# Supplementary material for: A new diversity oriented and metal-free approach to highly functionalized 3H-pyrimidin-4-ones
Source: Royal Society of Chemistry journal article supplement (doi:10.1039/c0ob00978d), 2011-01-01

**SUPPORTING INFORMATION**

**A new diversity oriented and metal-free approach to highly functionalized 3*H*-pyrimidin-4-ones**

Renata Riva,\* Luca Banfi, Andrea Basso, and Paola Zito

*Università di Genova, Dipartimento di Chimica e Chimica Industriale, Via Dodecaneso 31, 16146-Genova (Italy)*

[riva@chimica.unige.it](mailto:riva@chimica.unige.it)

**Contents:** Copies of  $^1\text{H}$  and  $^{13}\text{C}$  NMR spectra

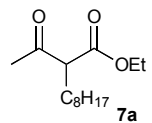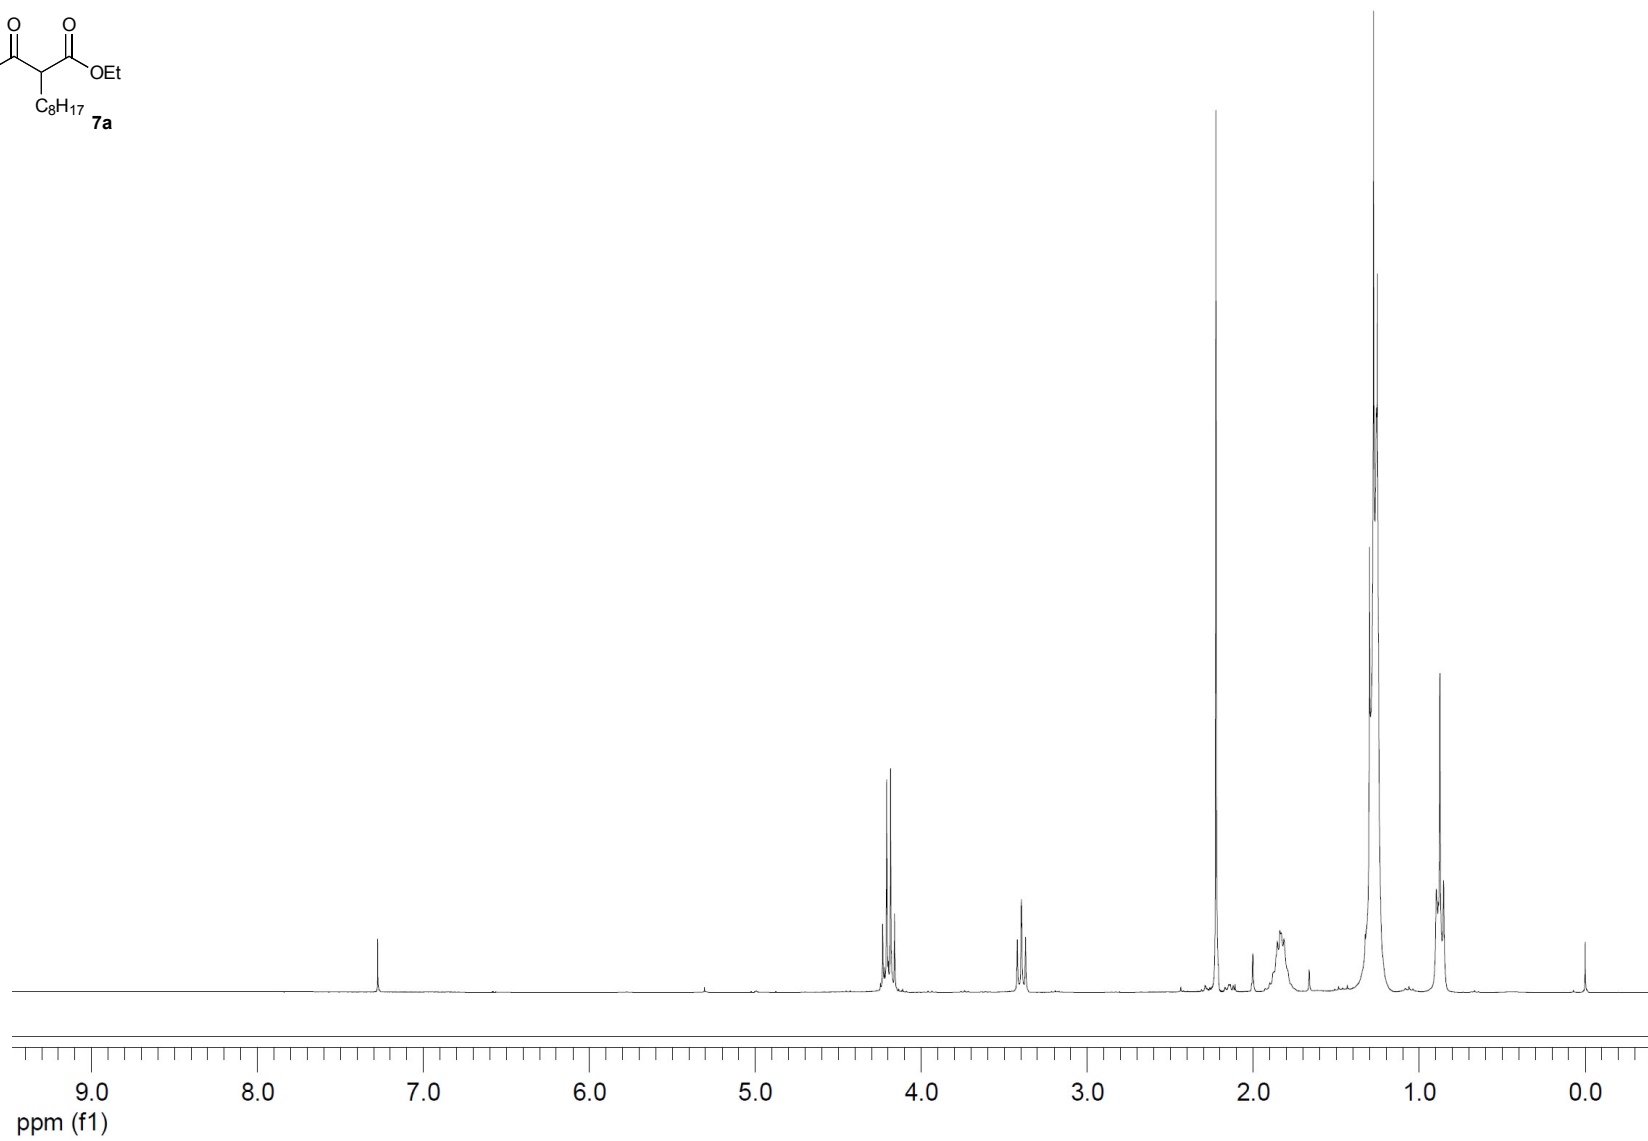

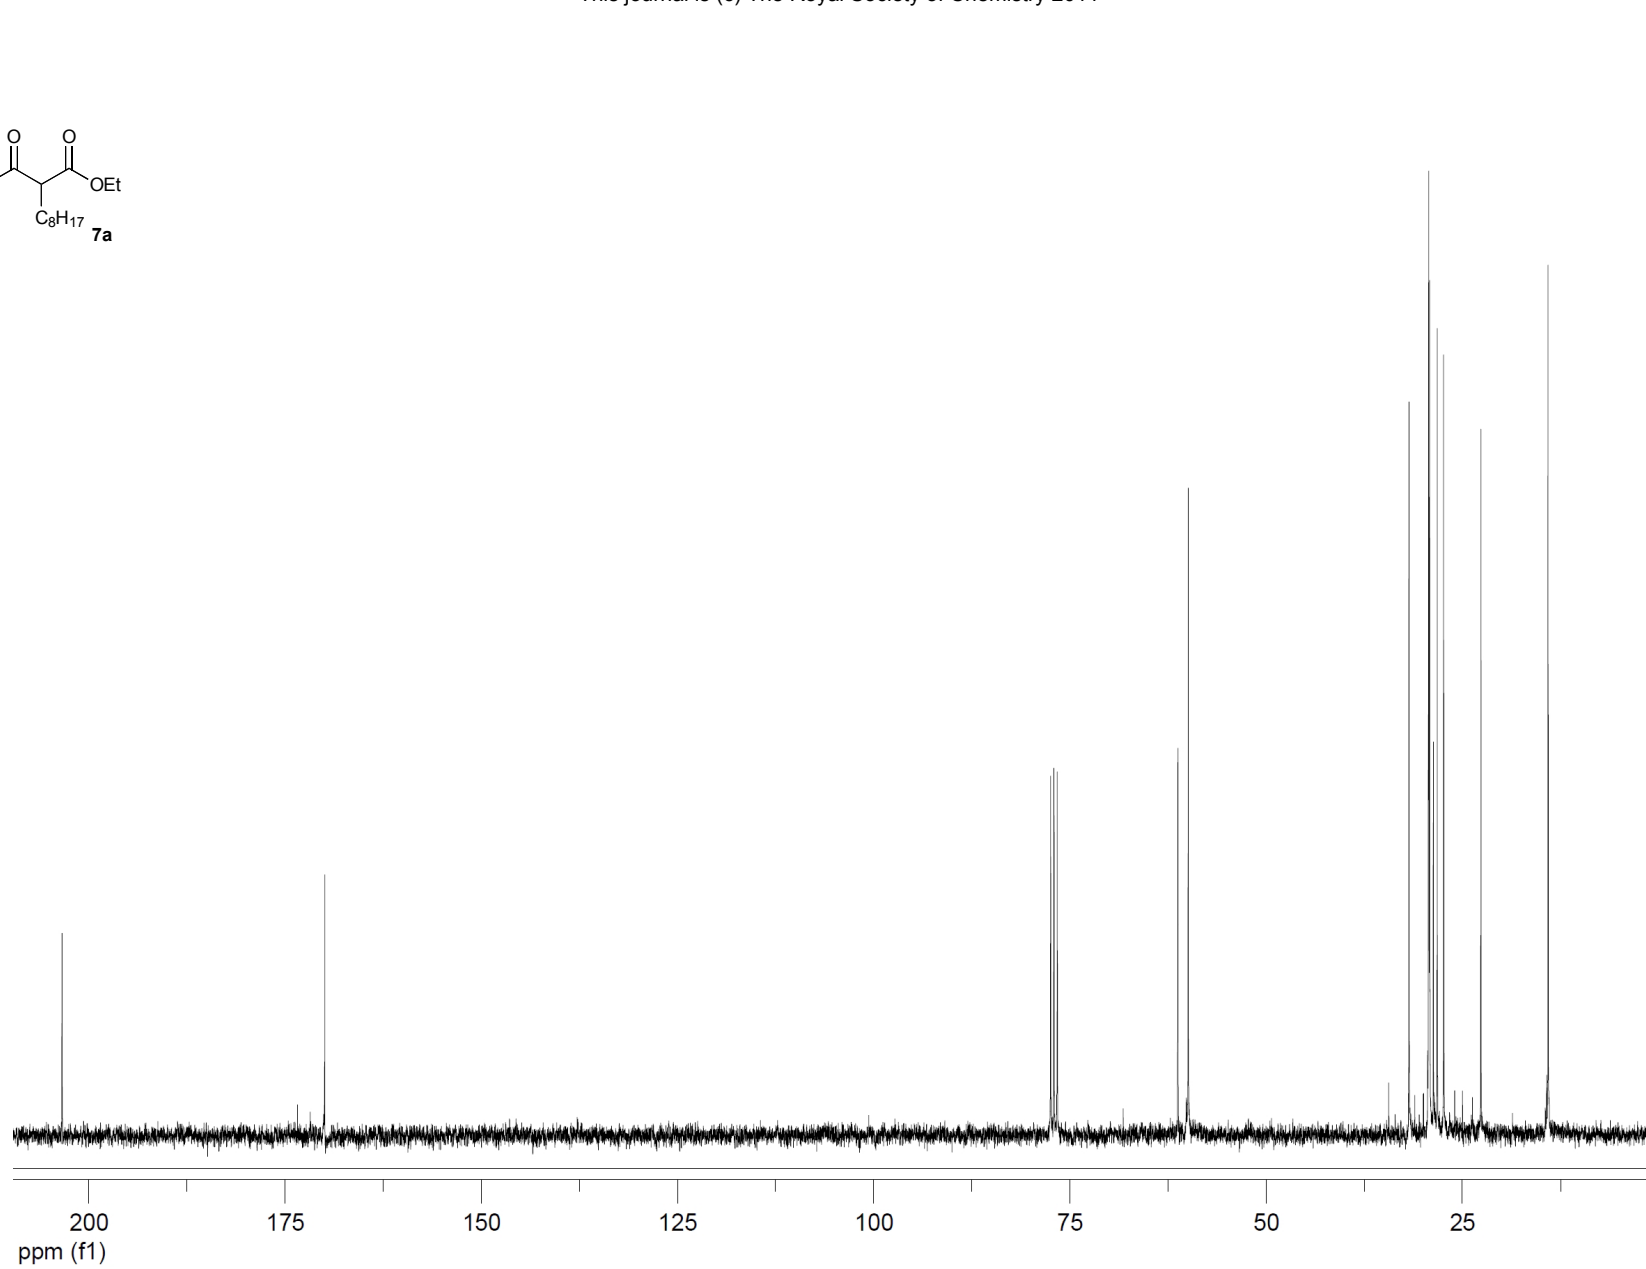

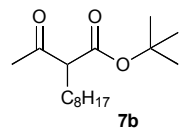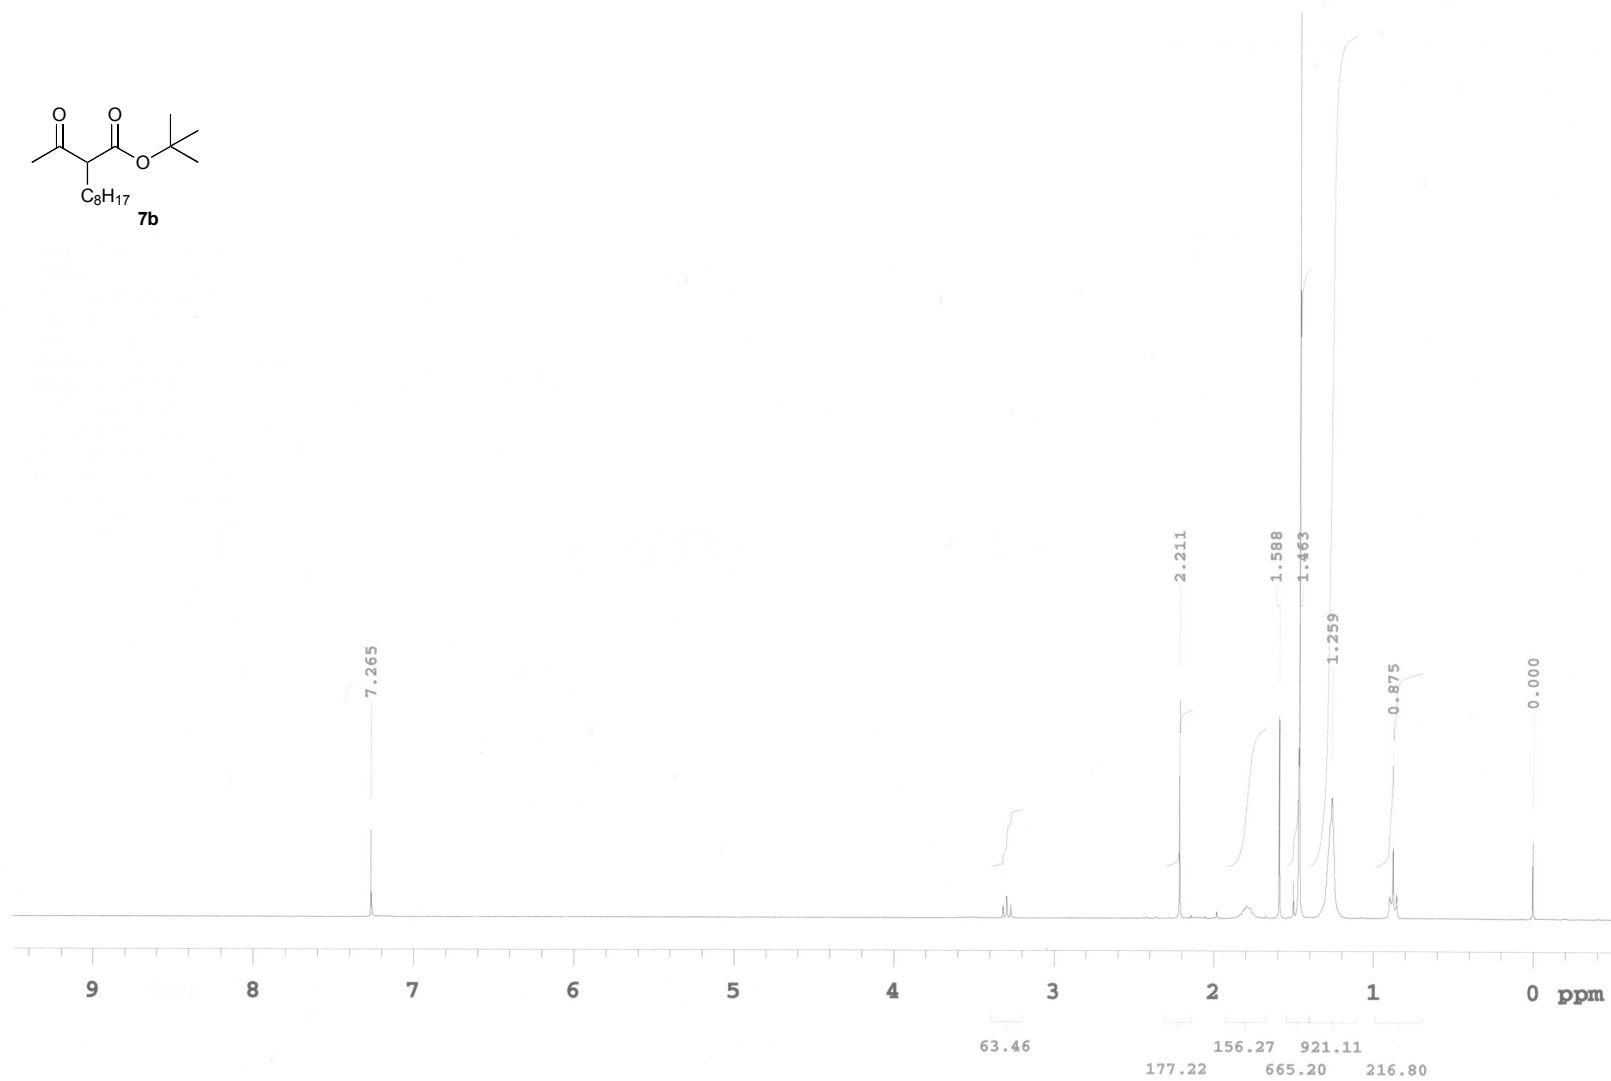



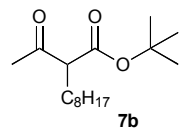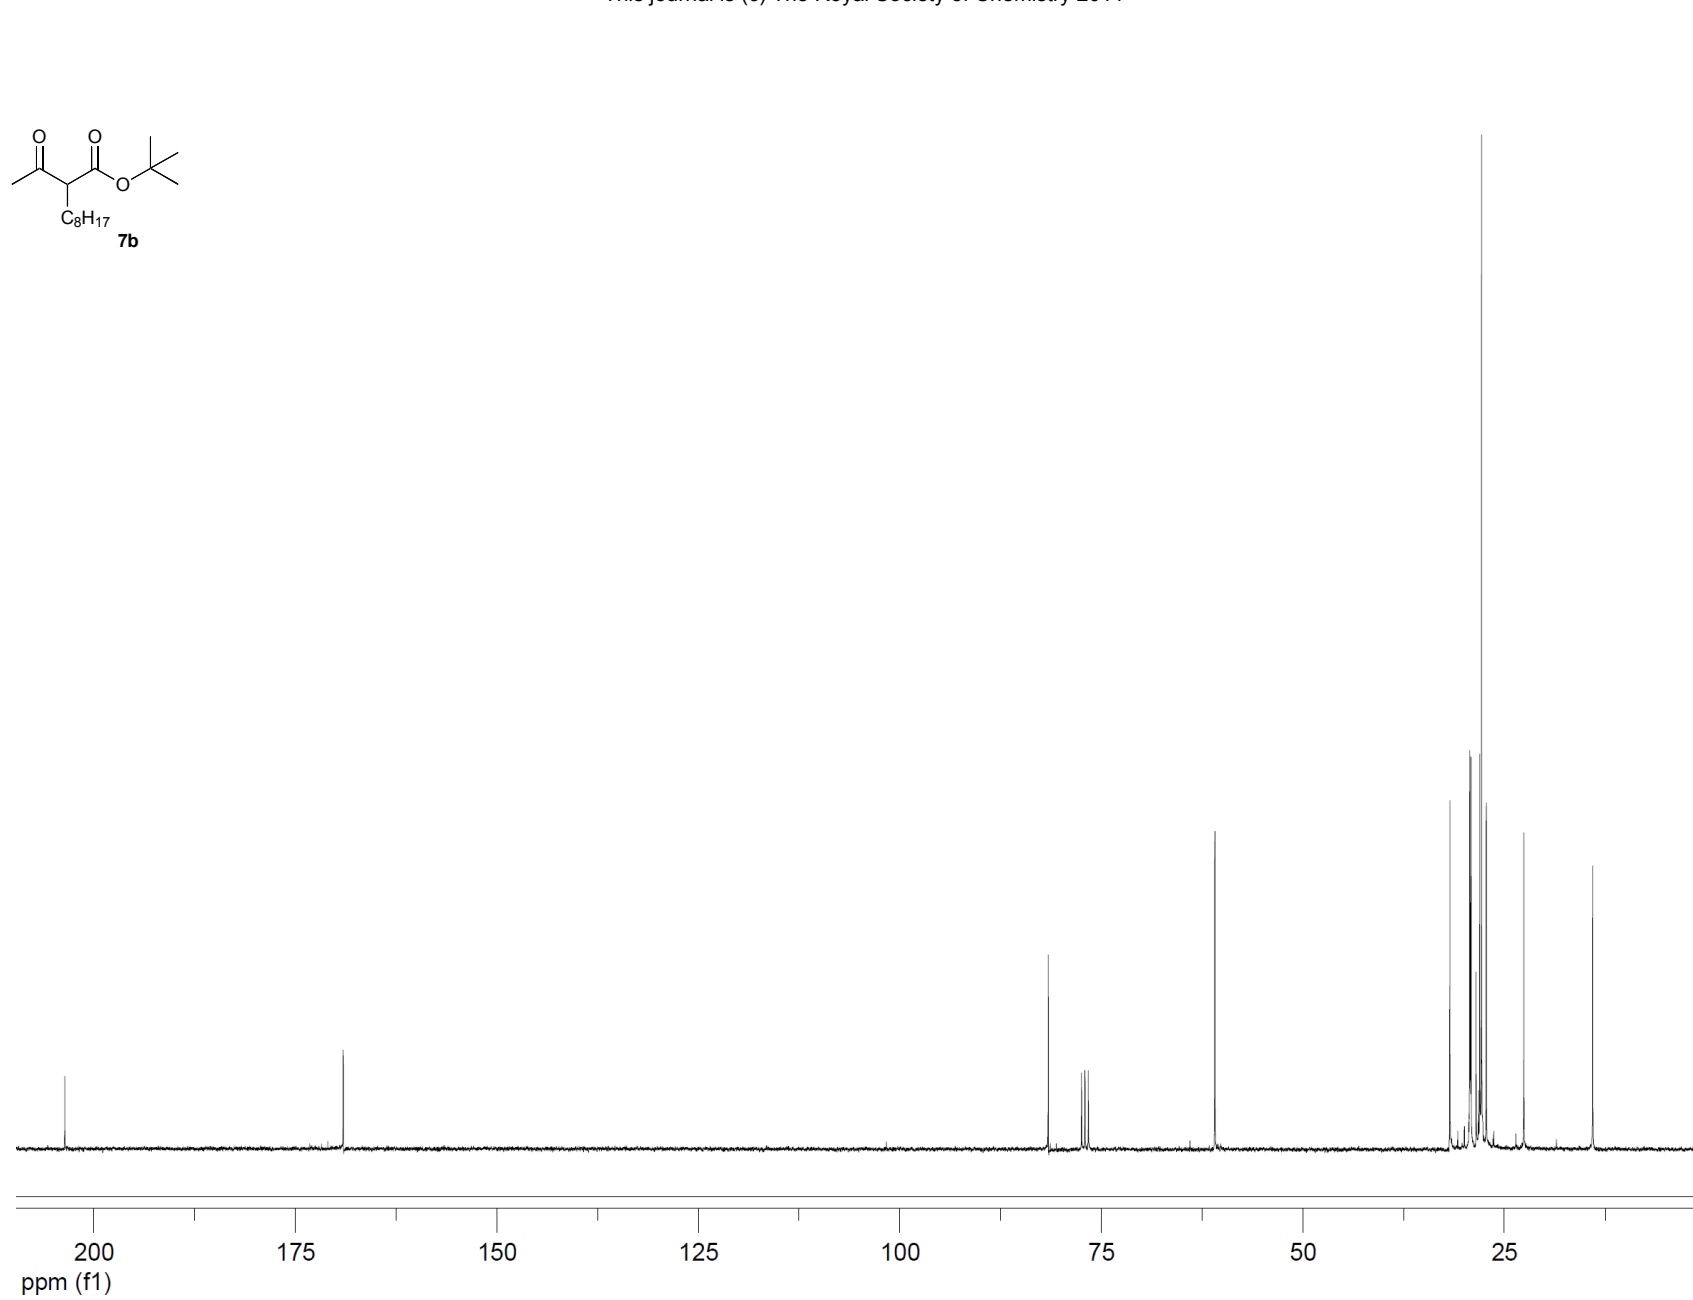

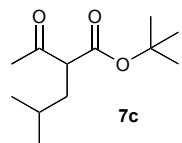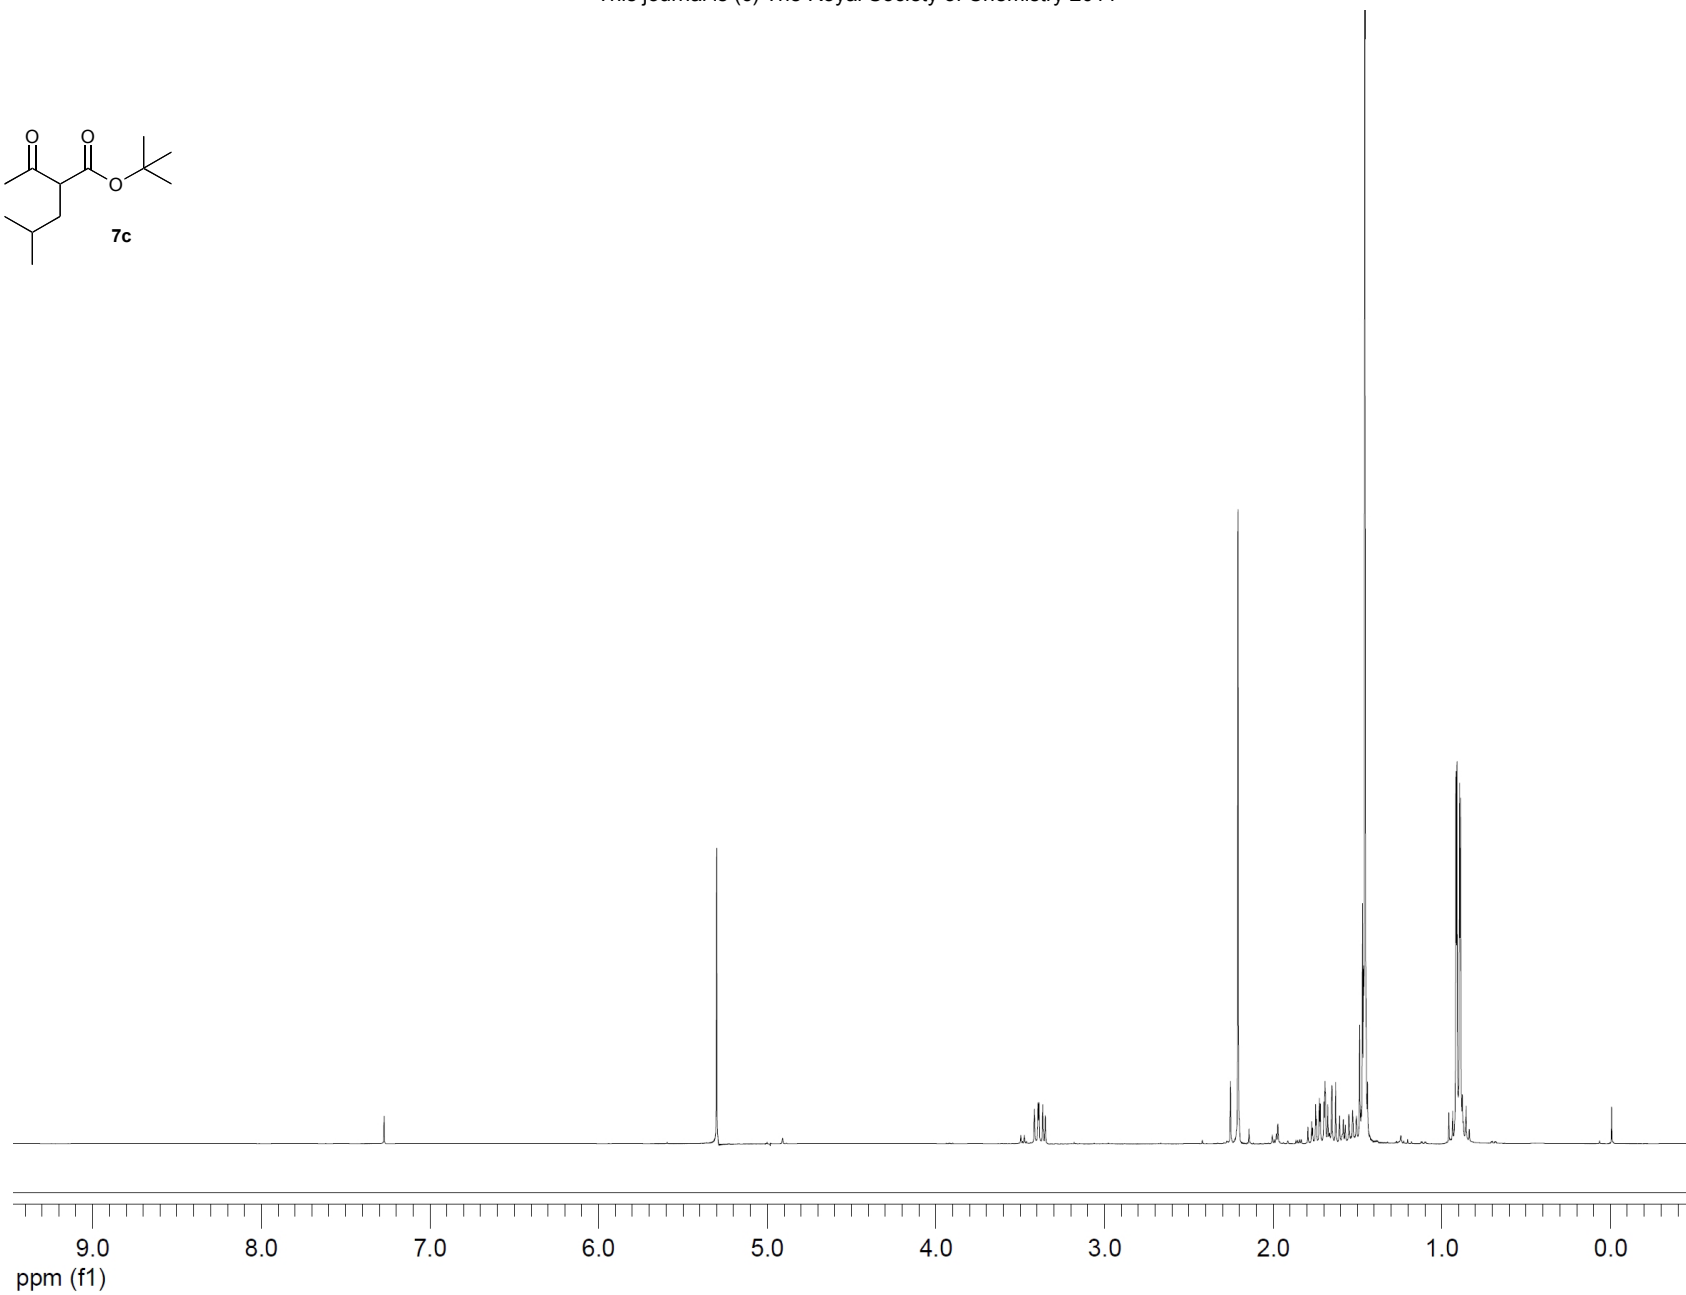

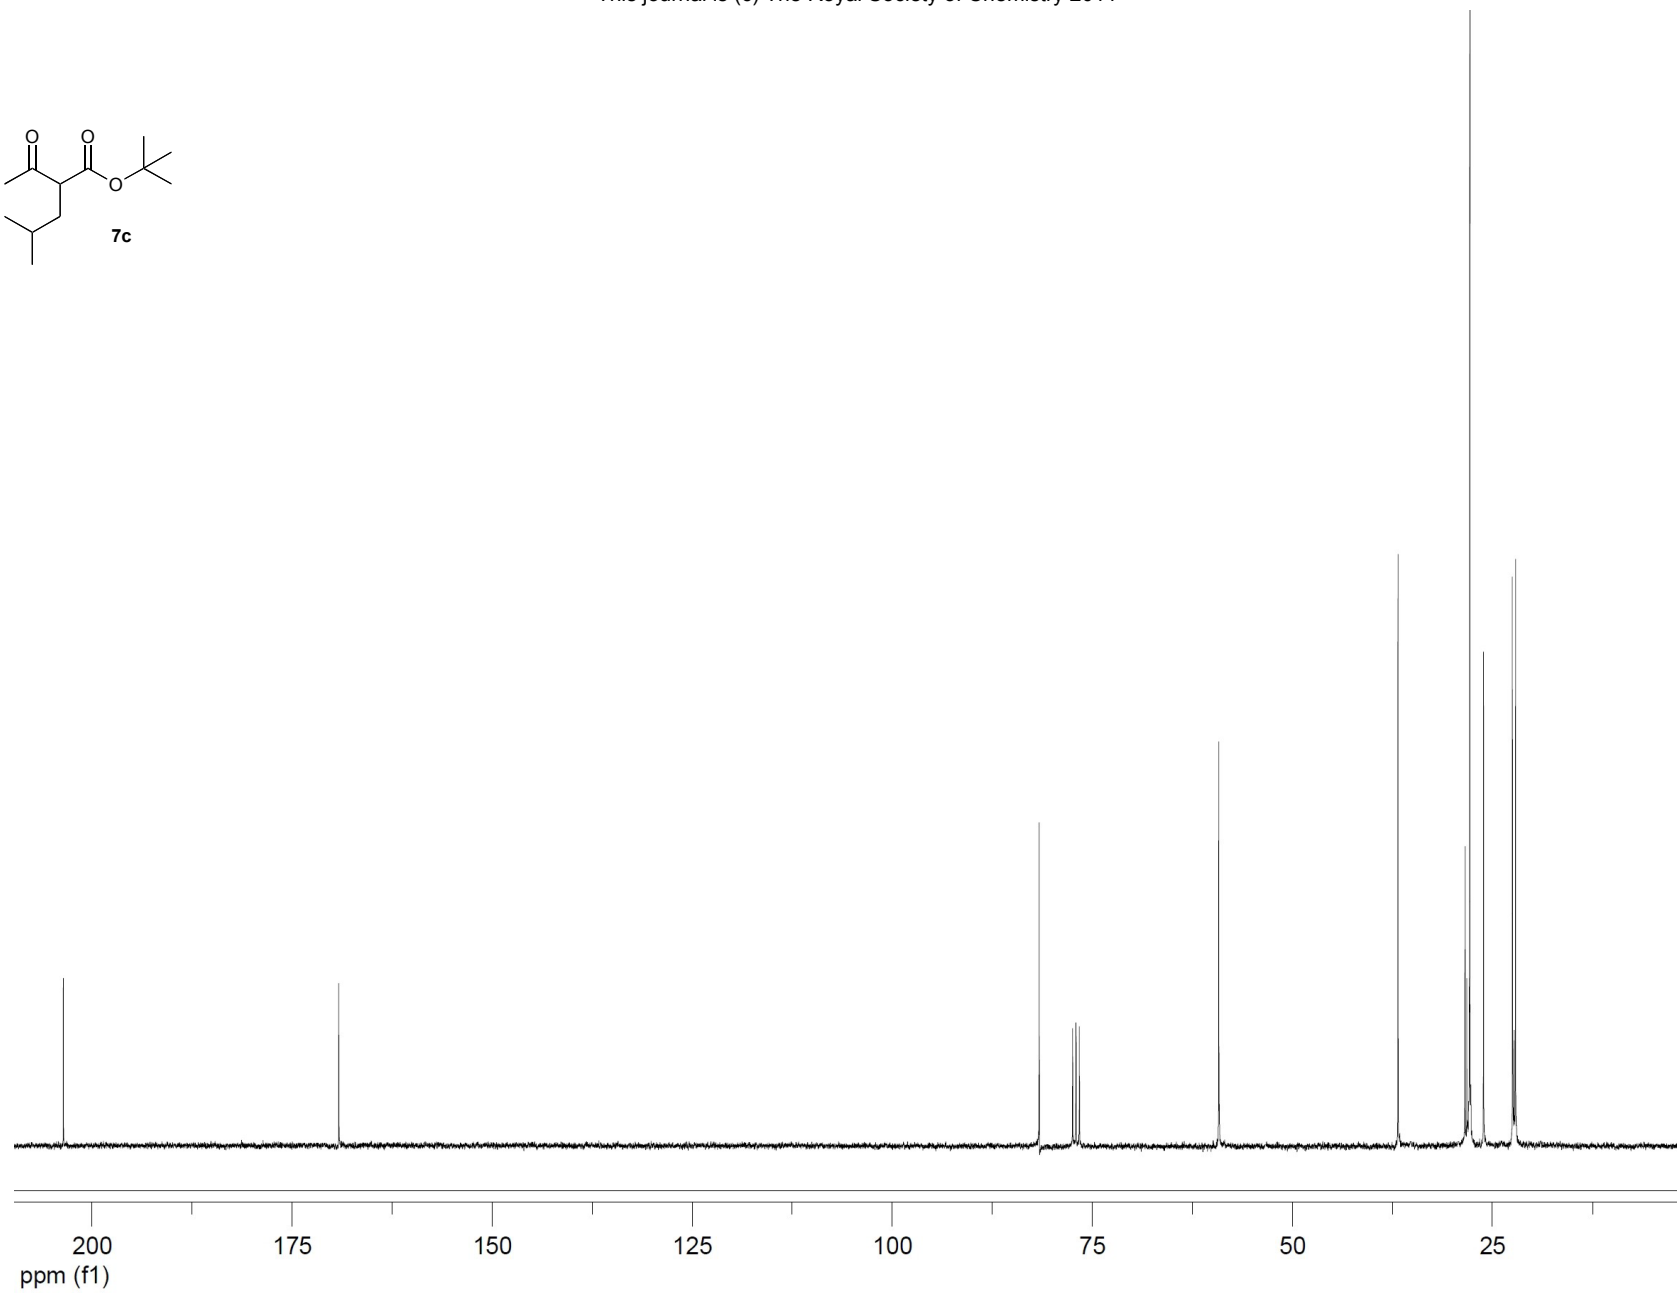

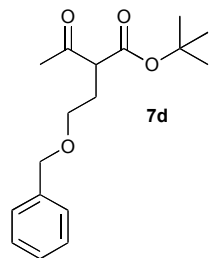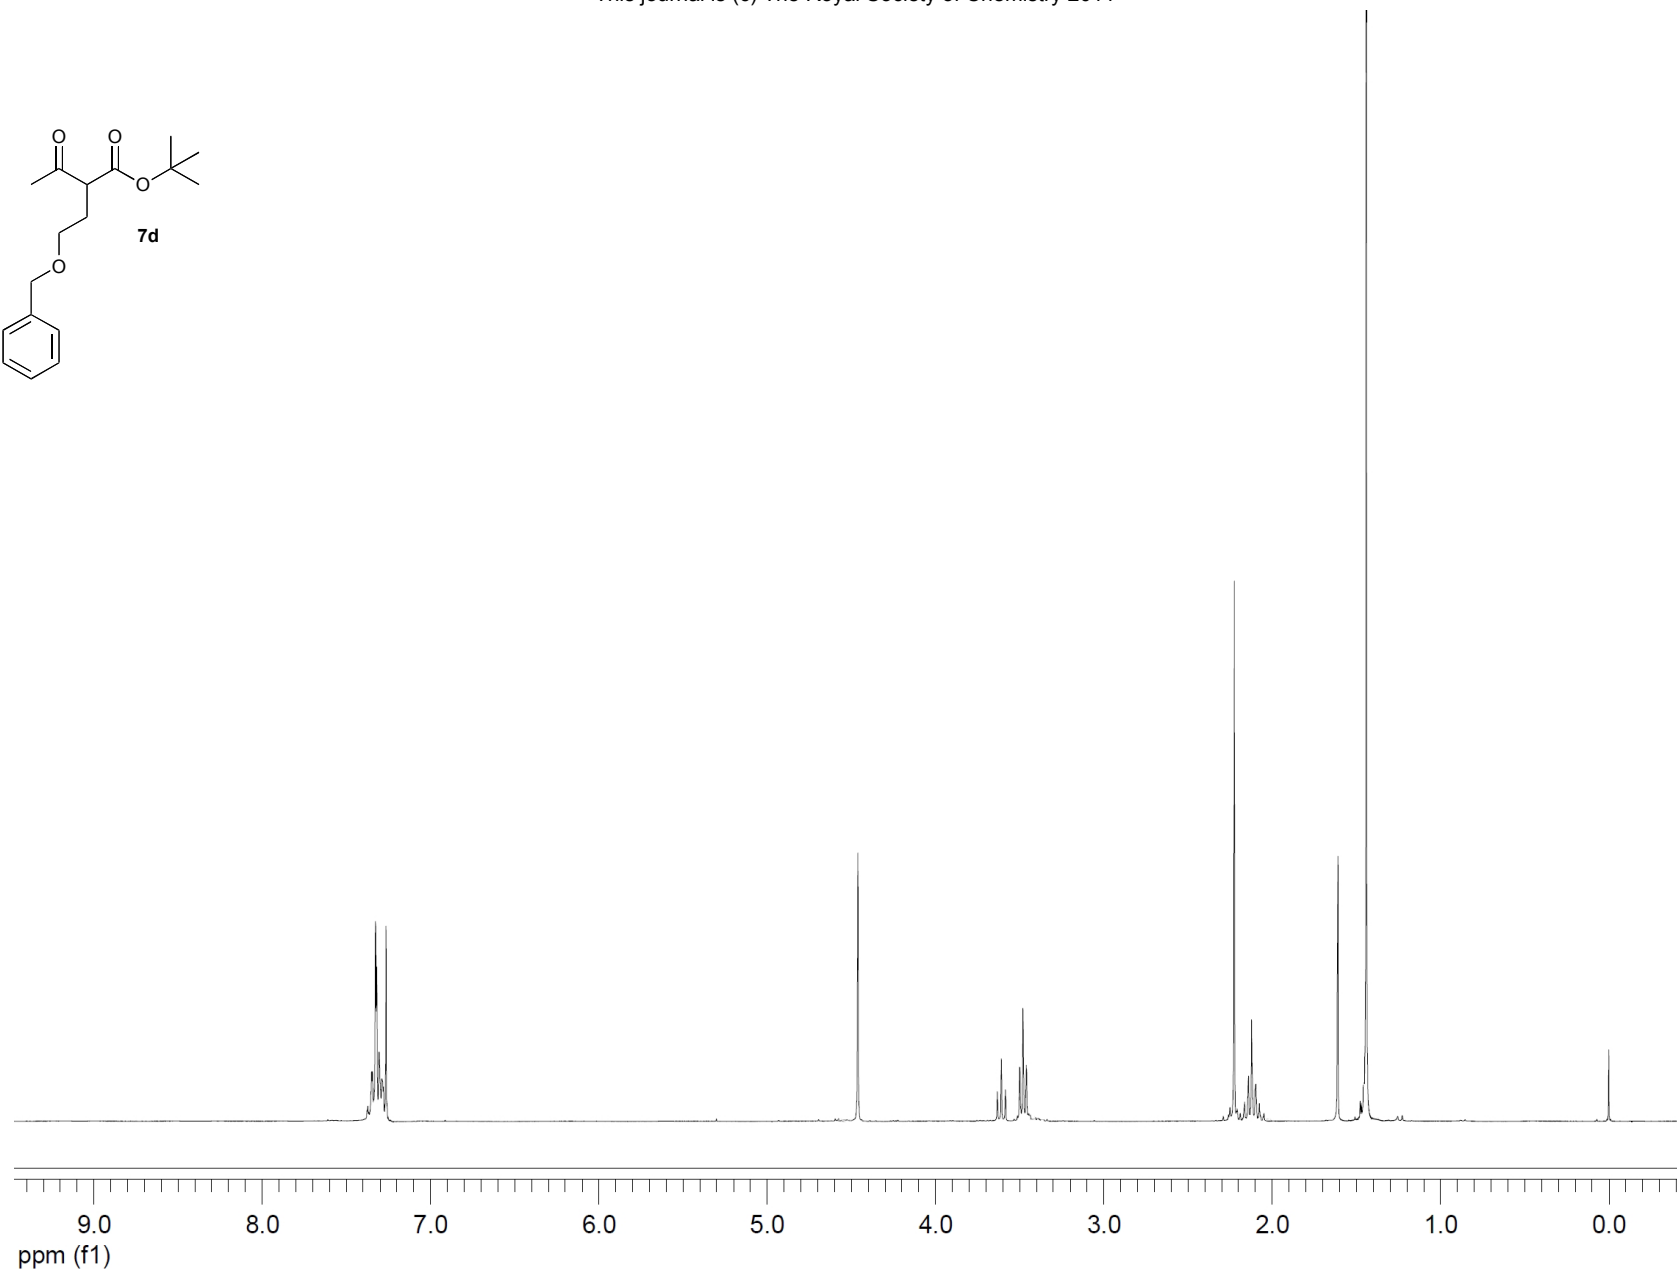

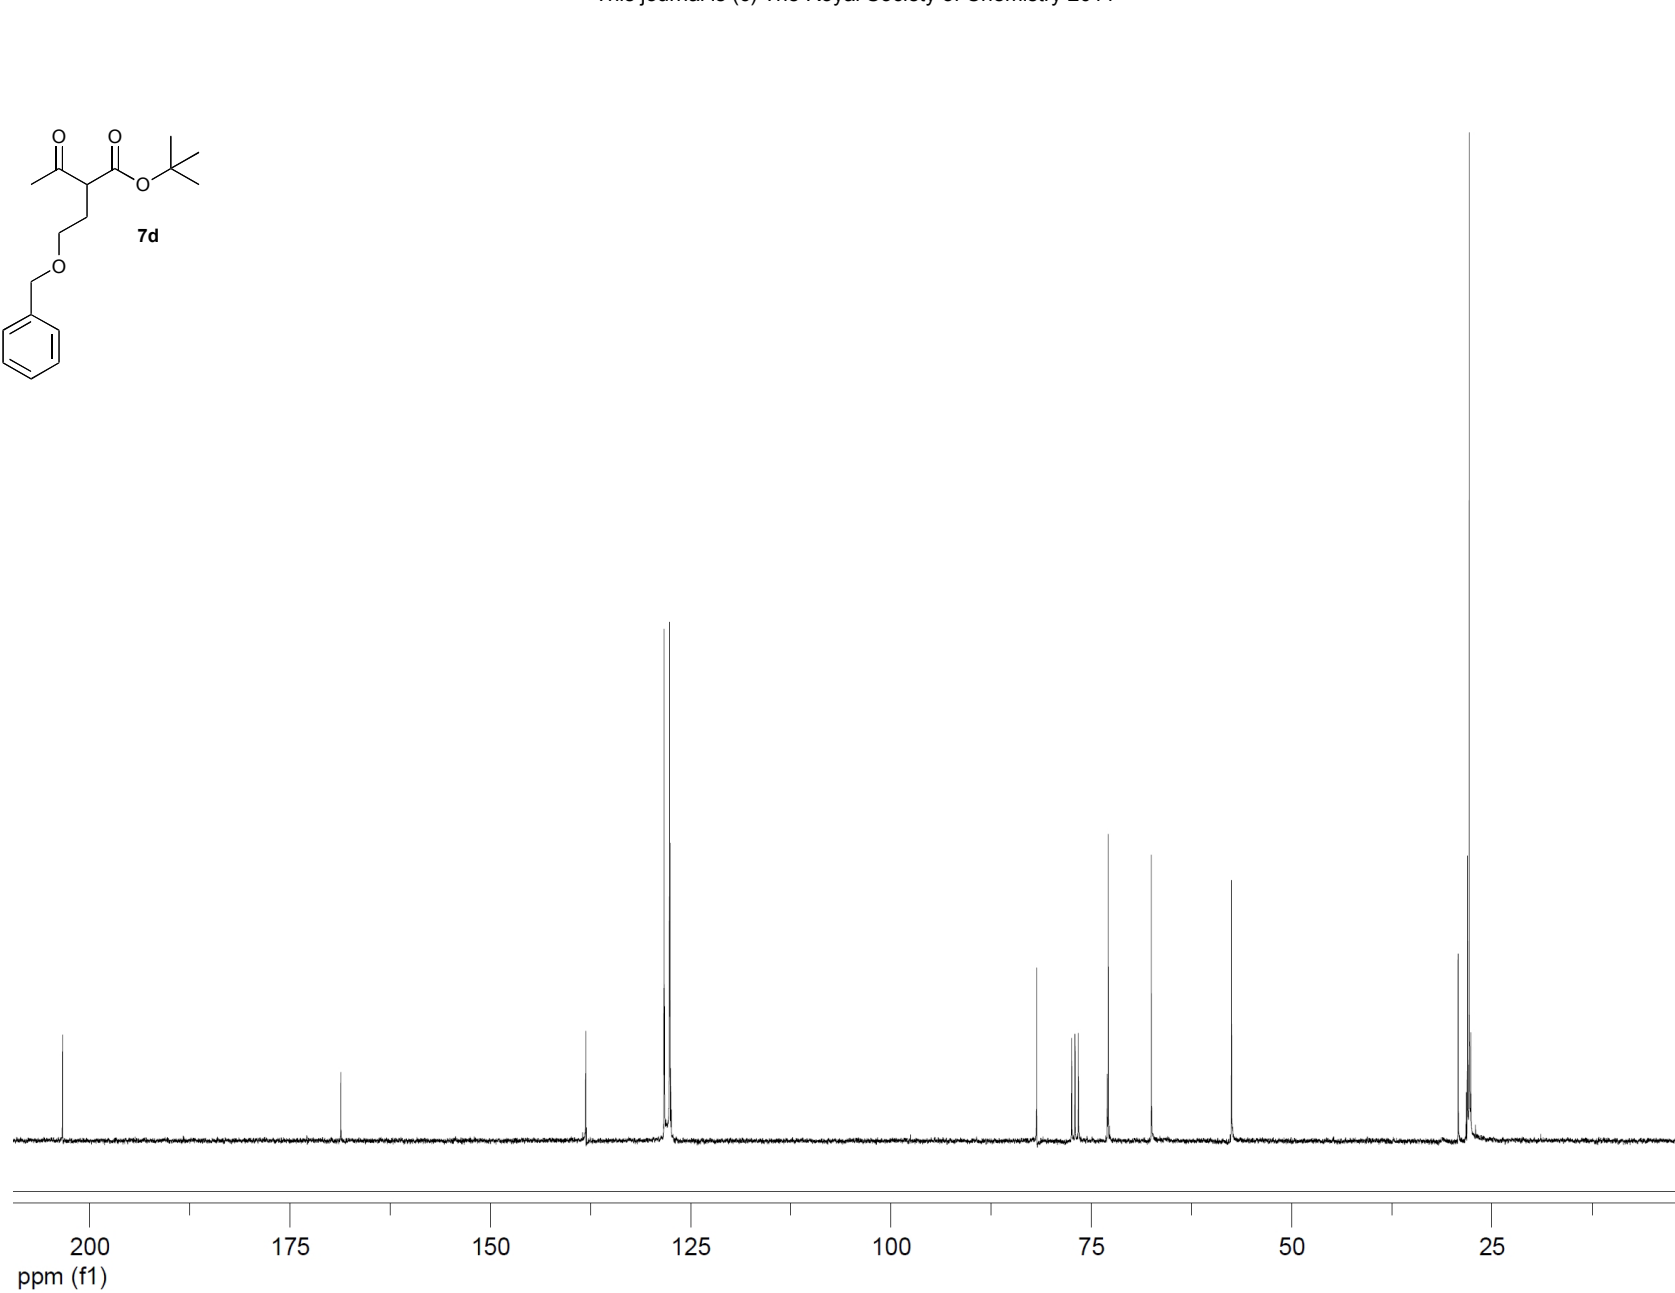

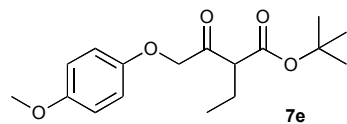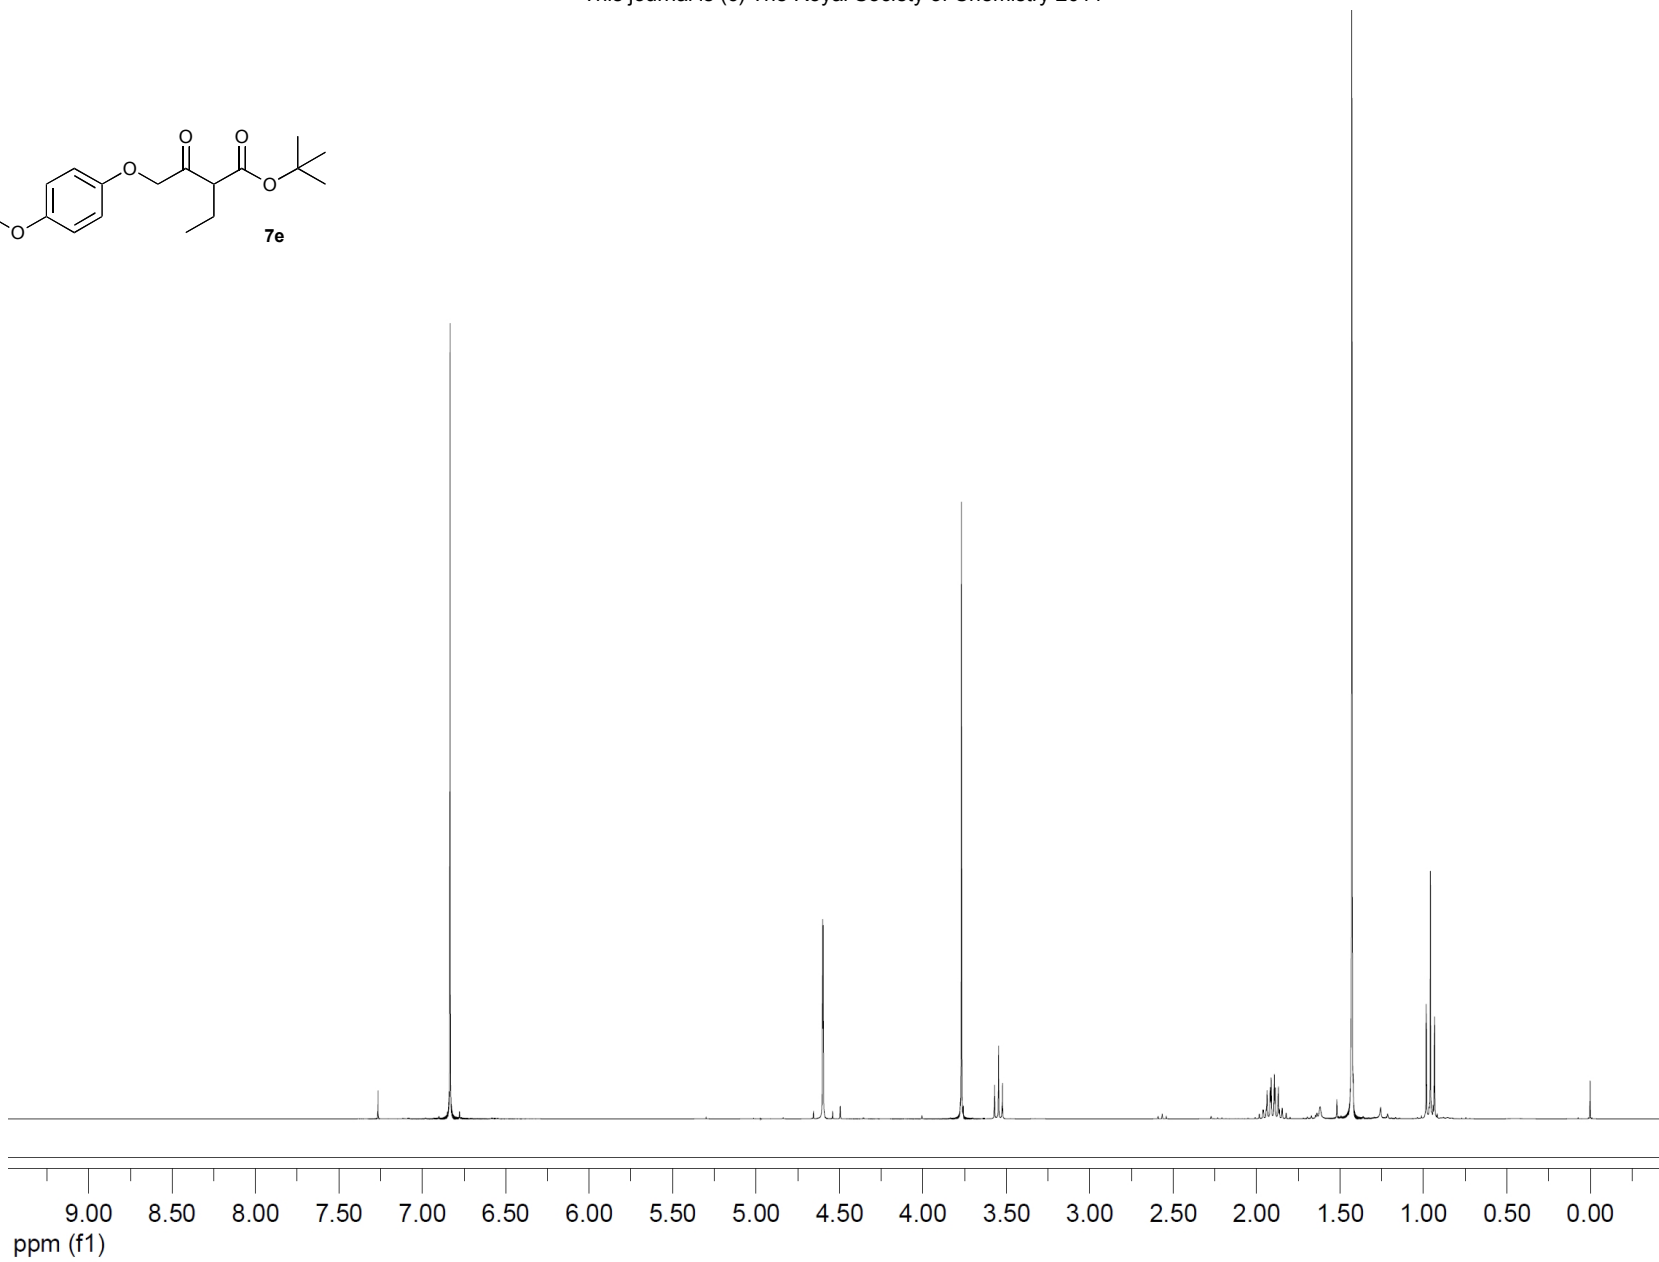

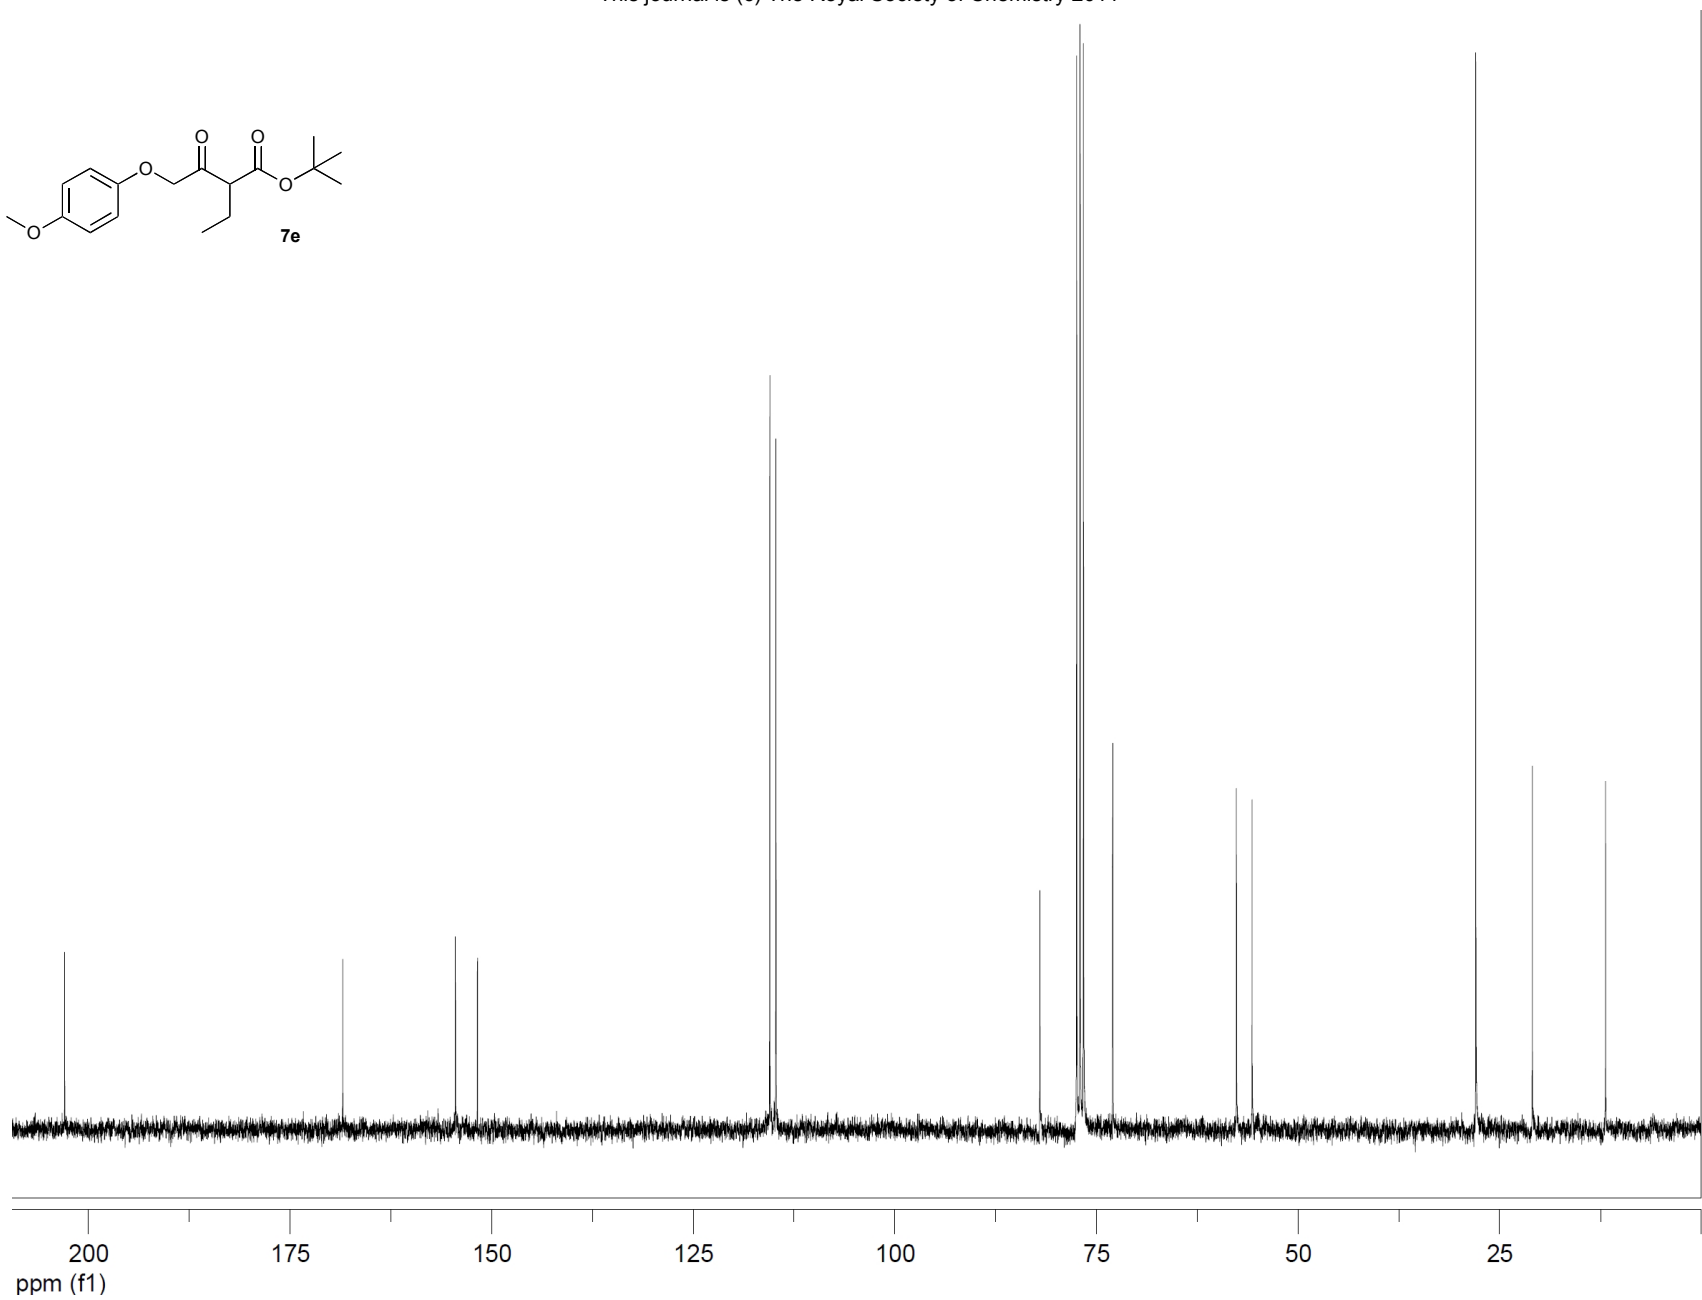

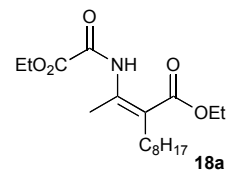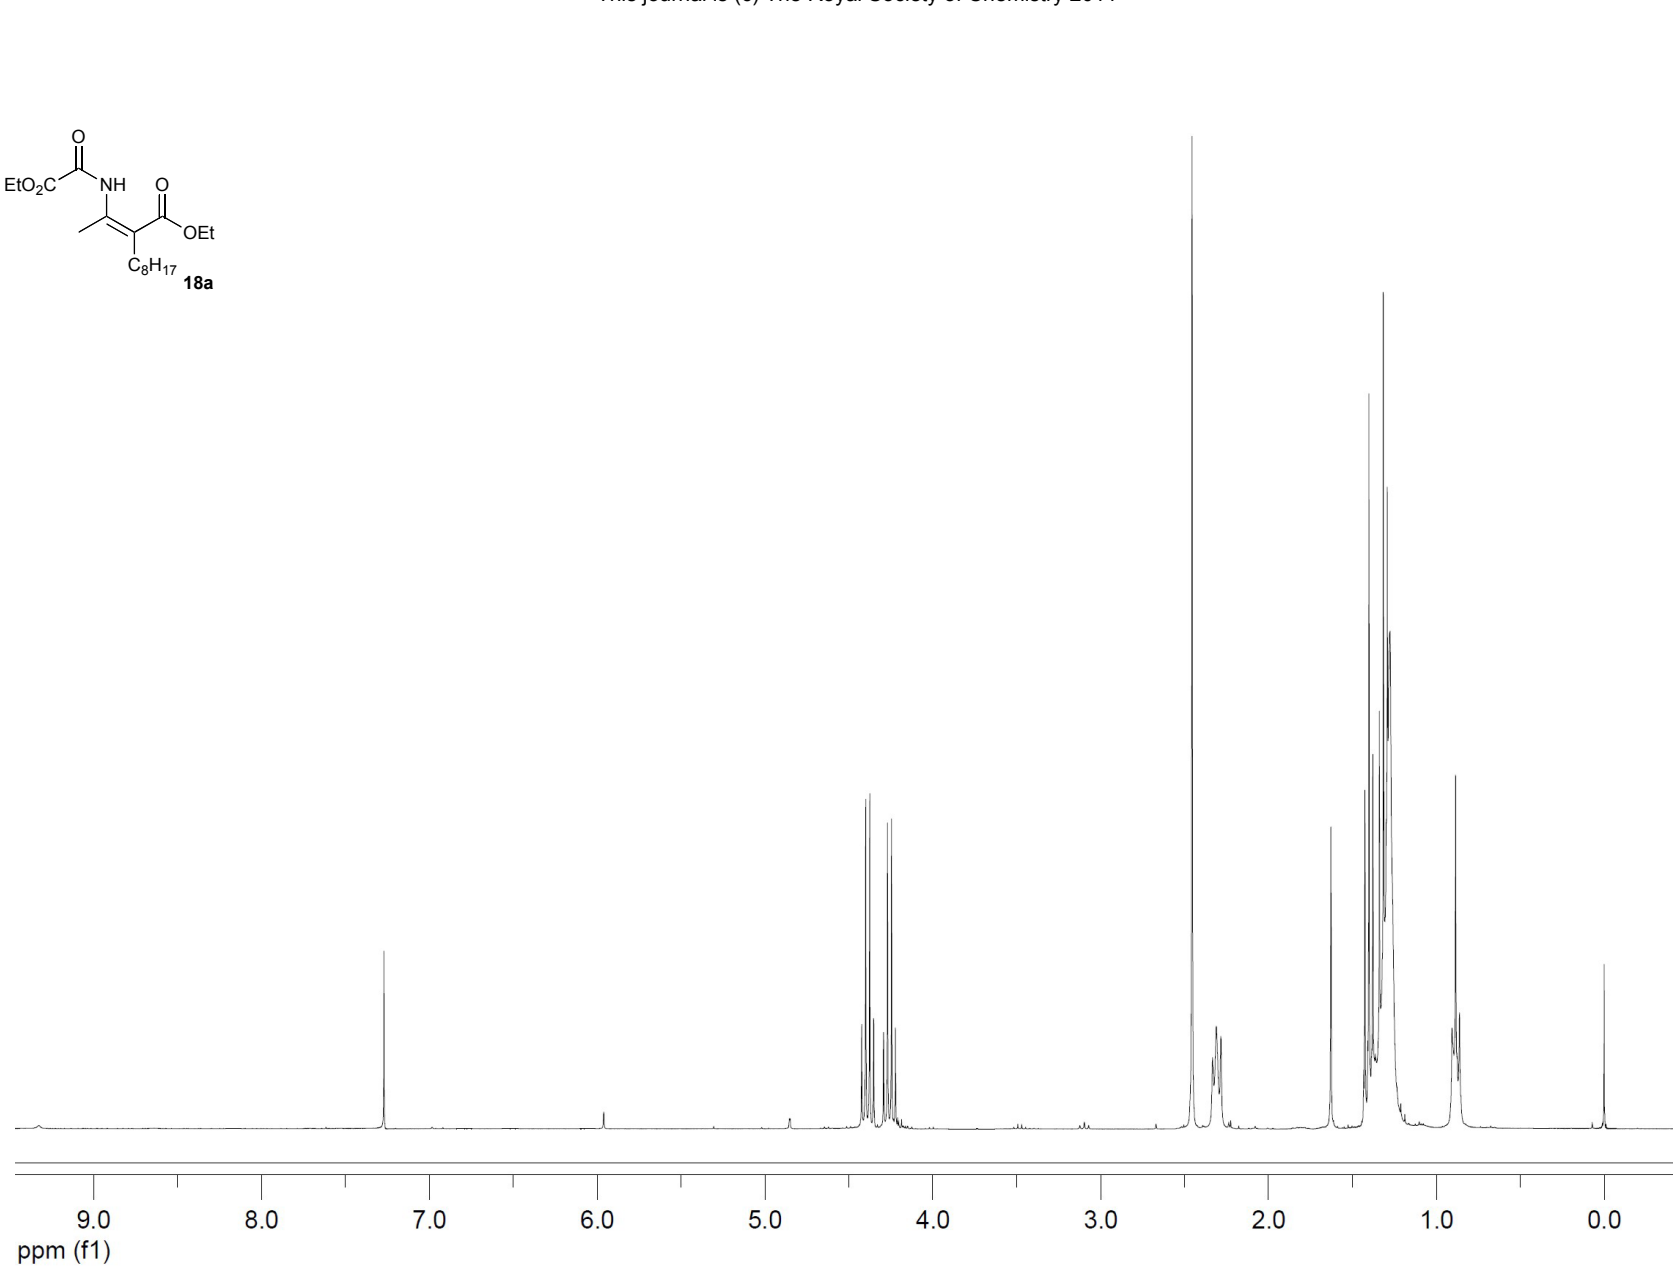



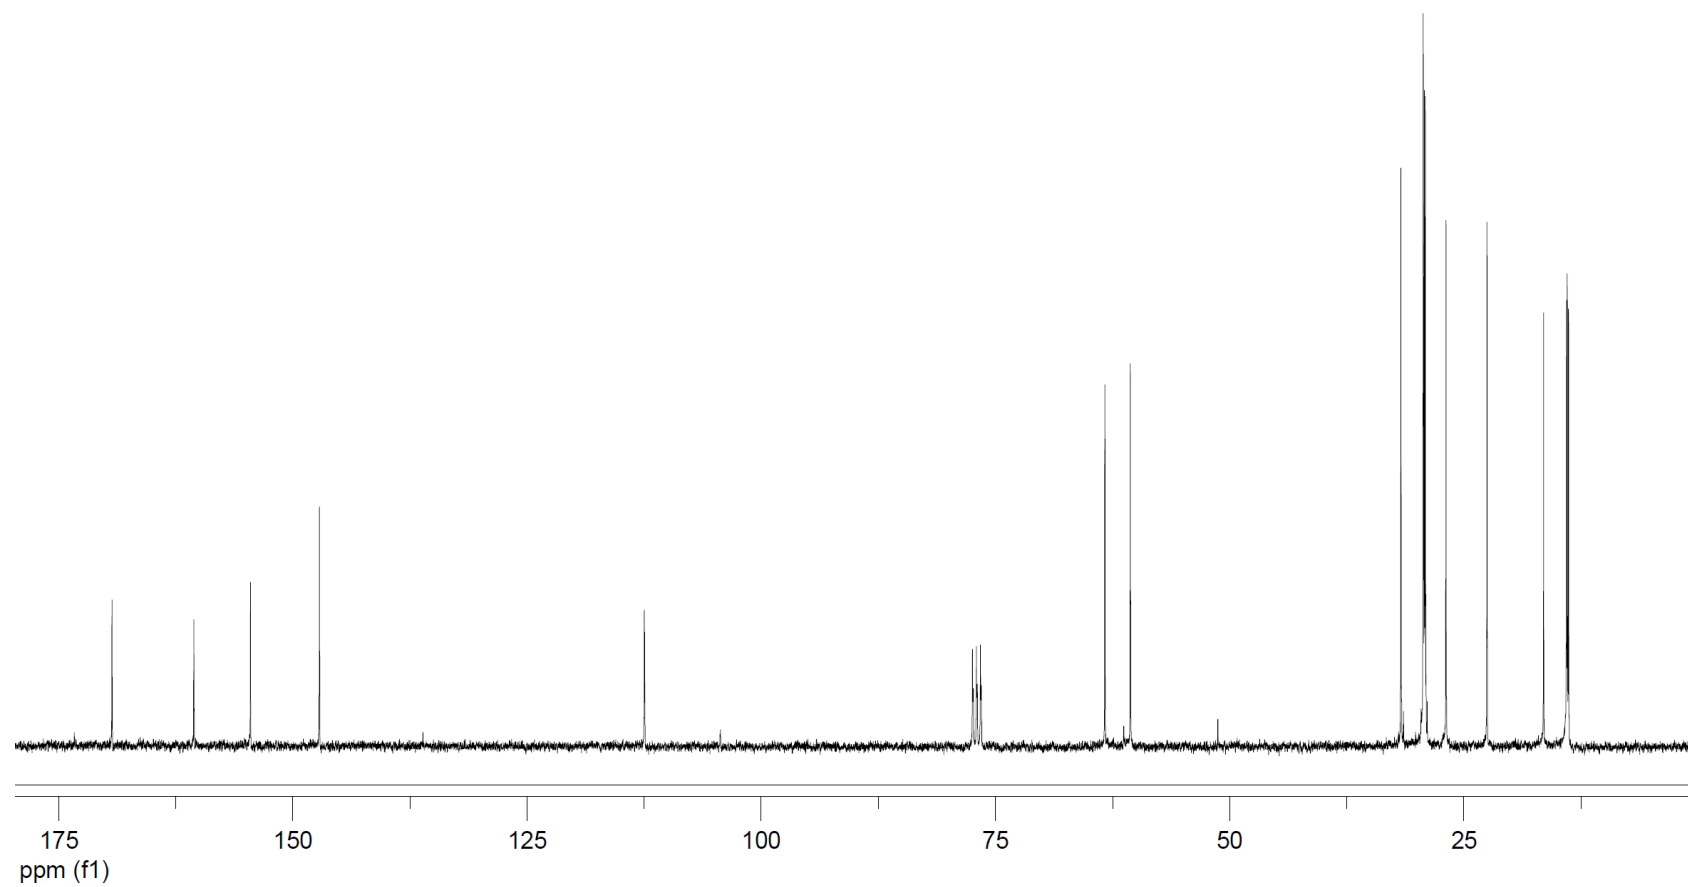

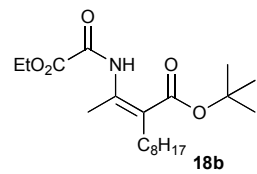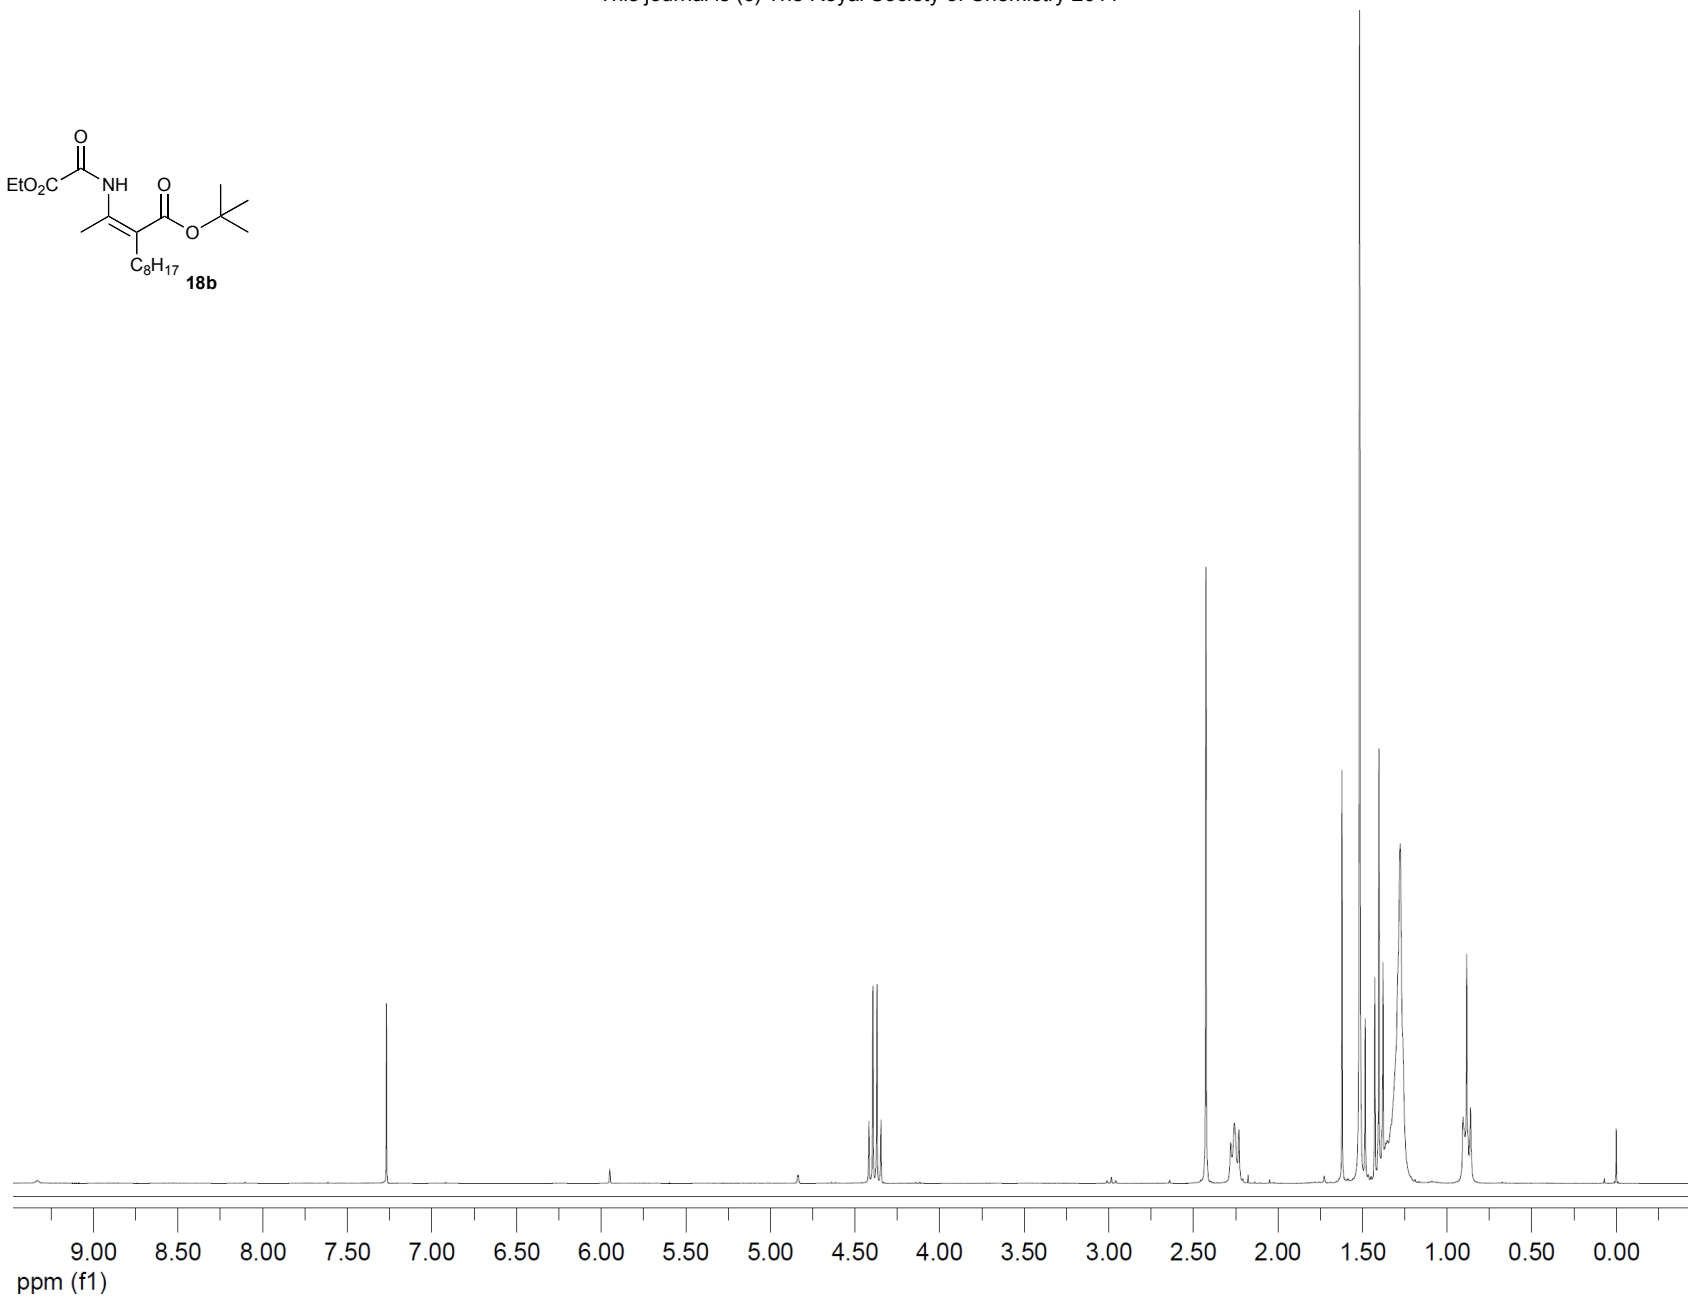

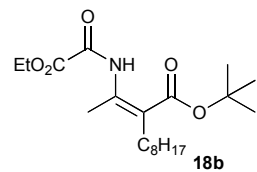

175  
ppm (f1)

150

125

100

75

50

25

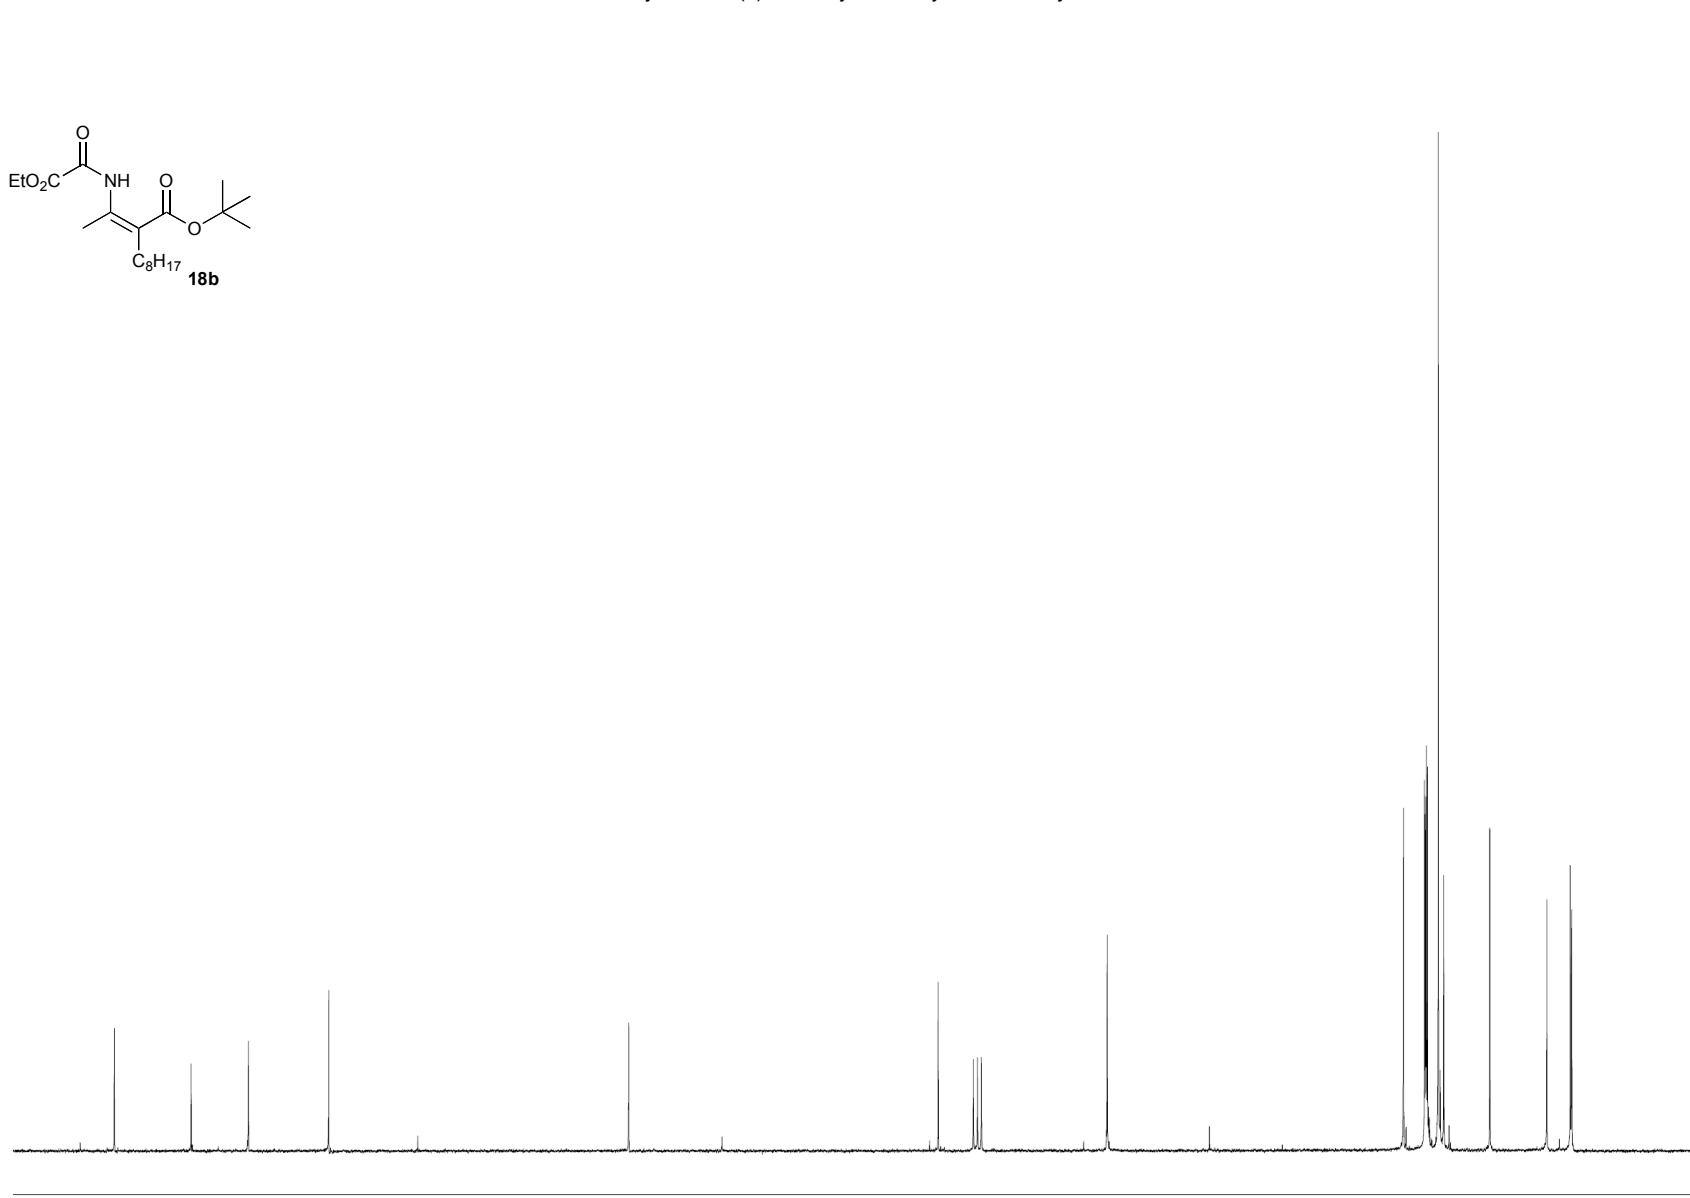

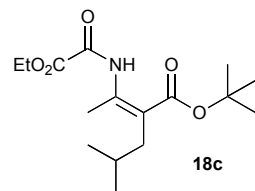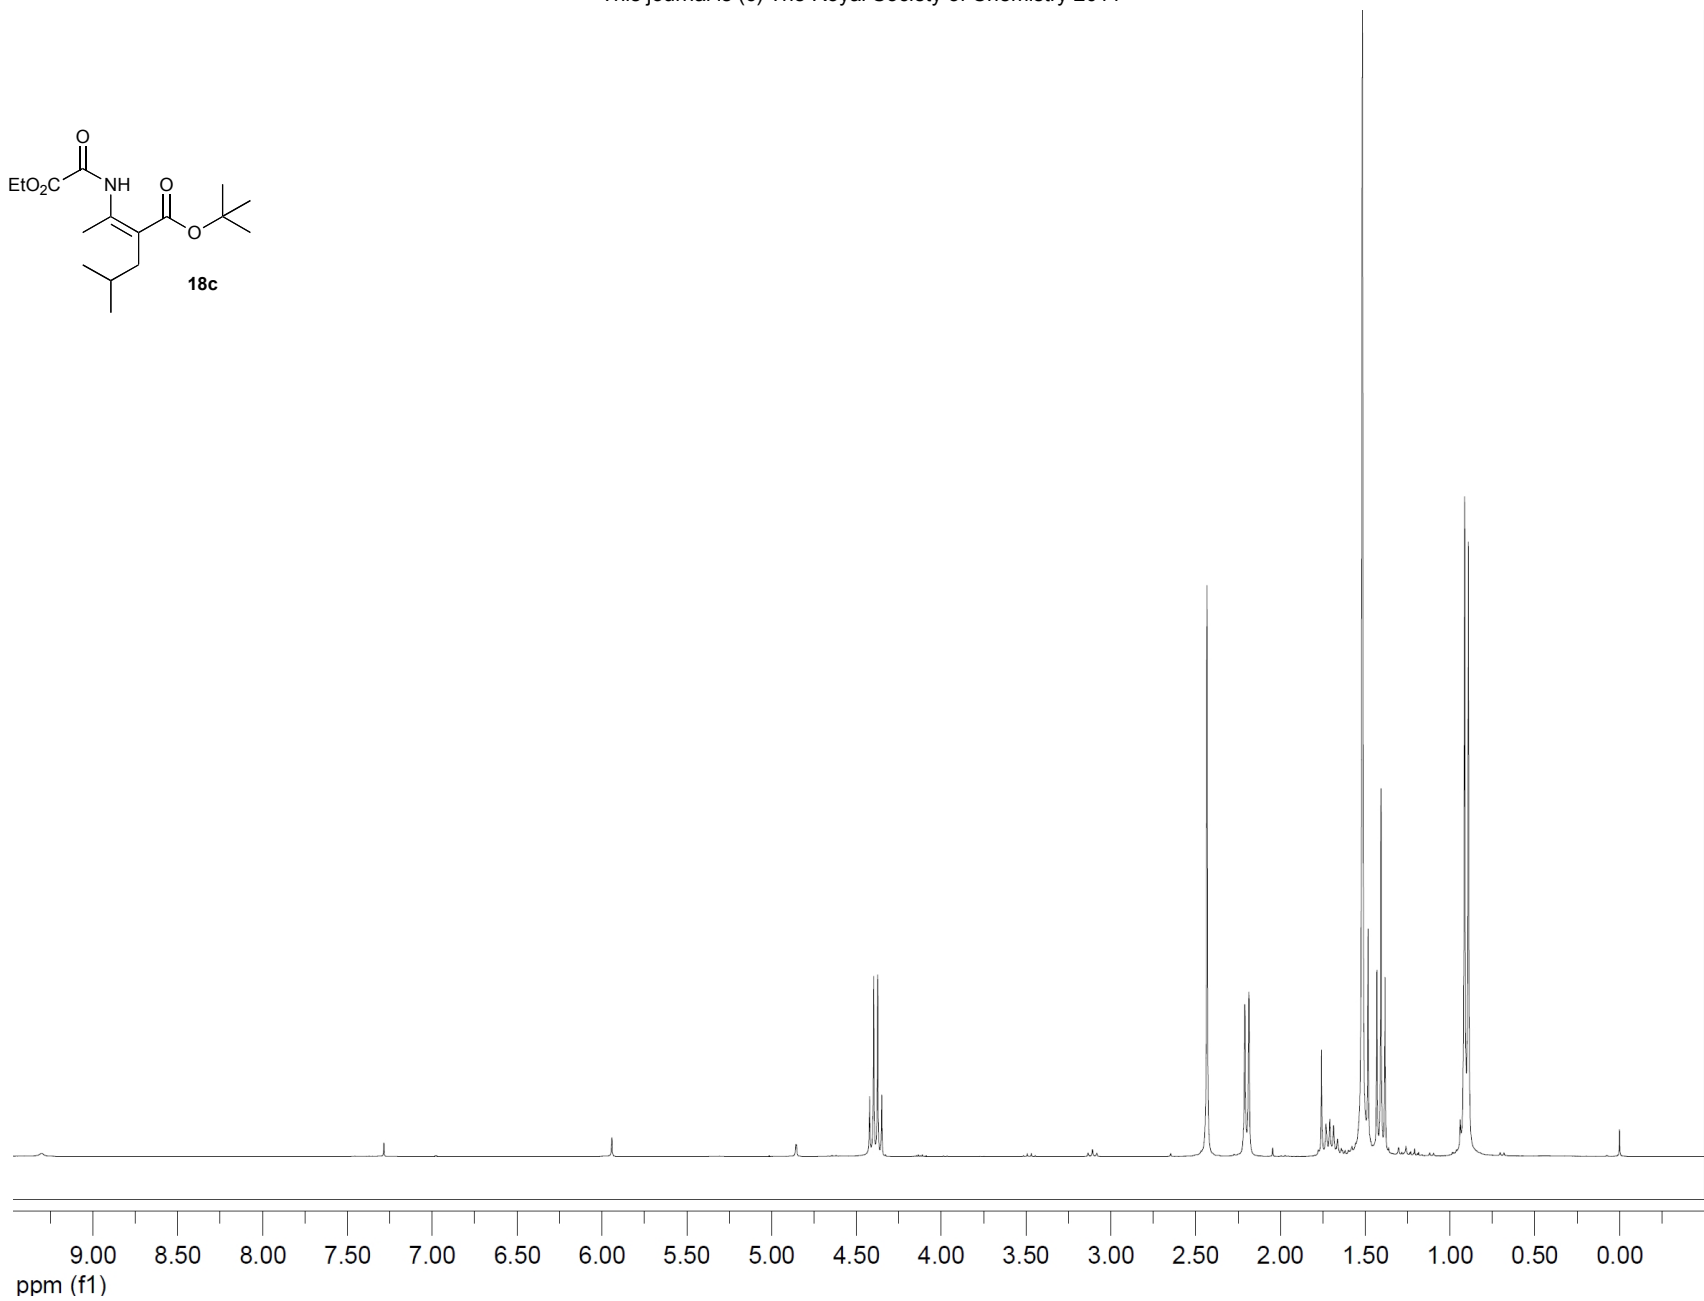

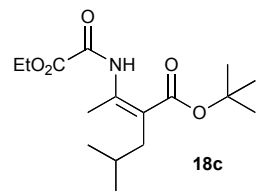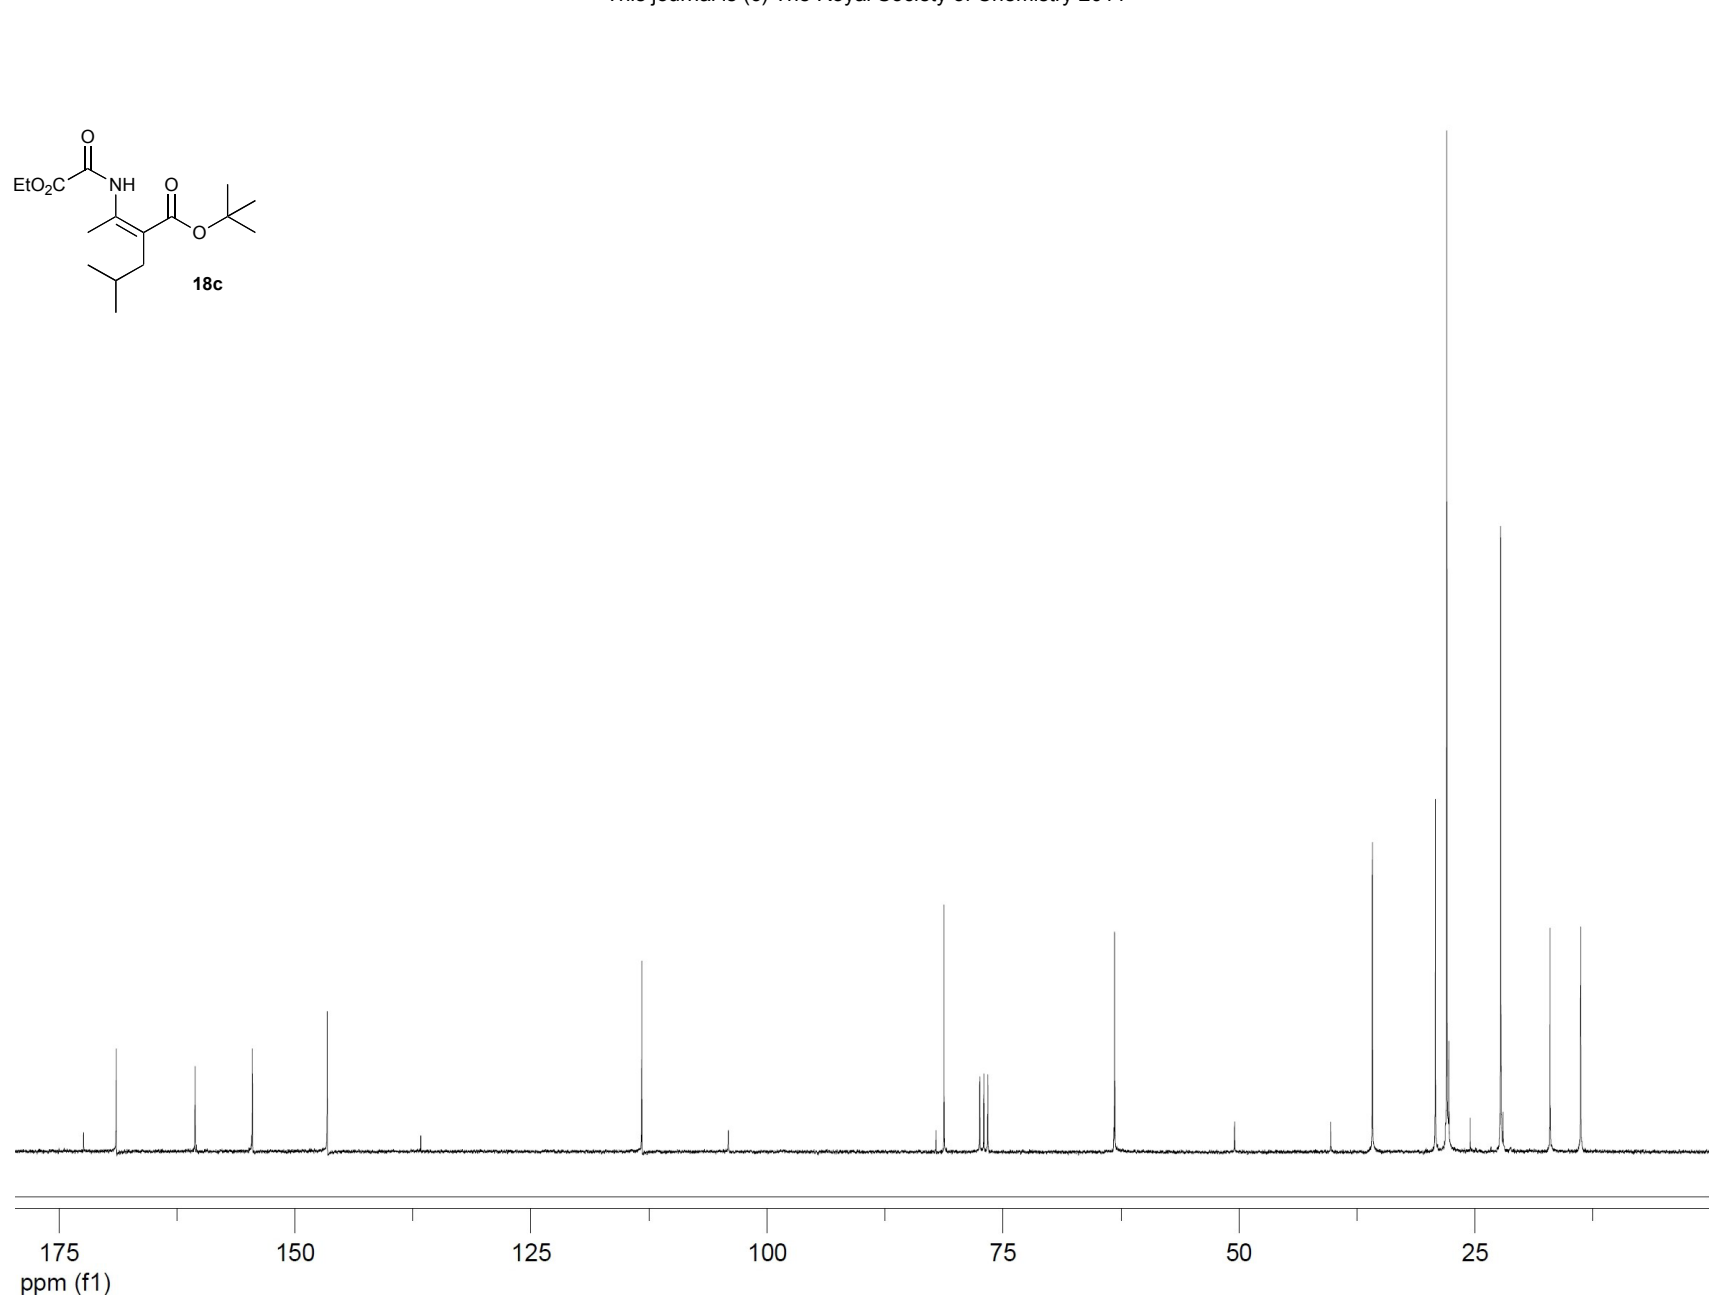

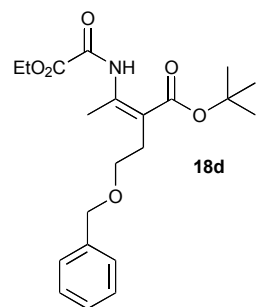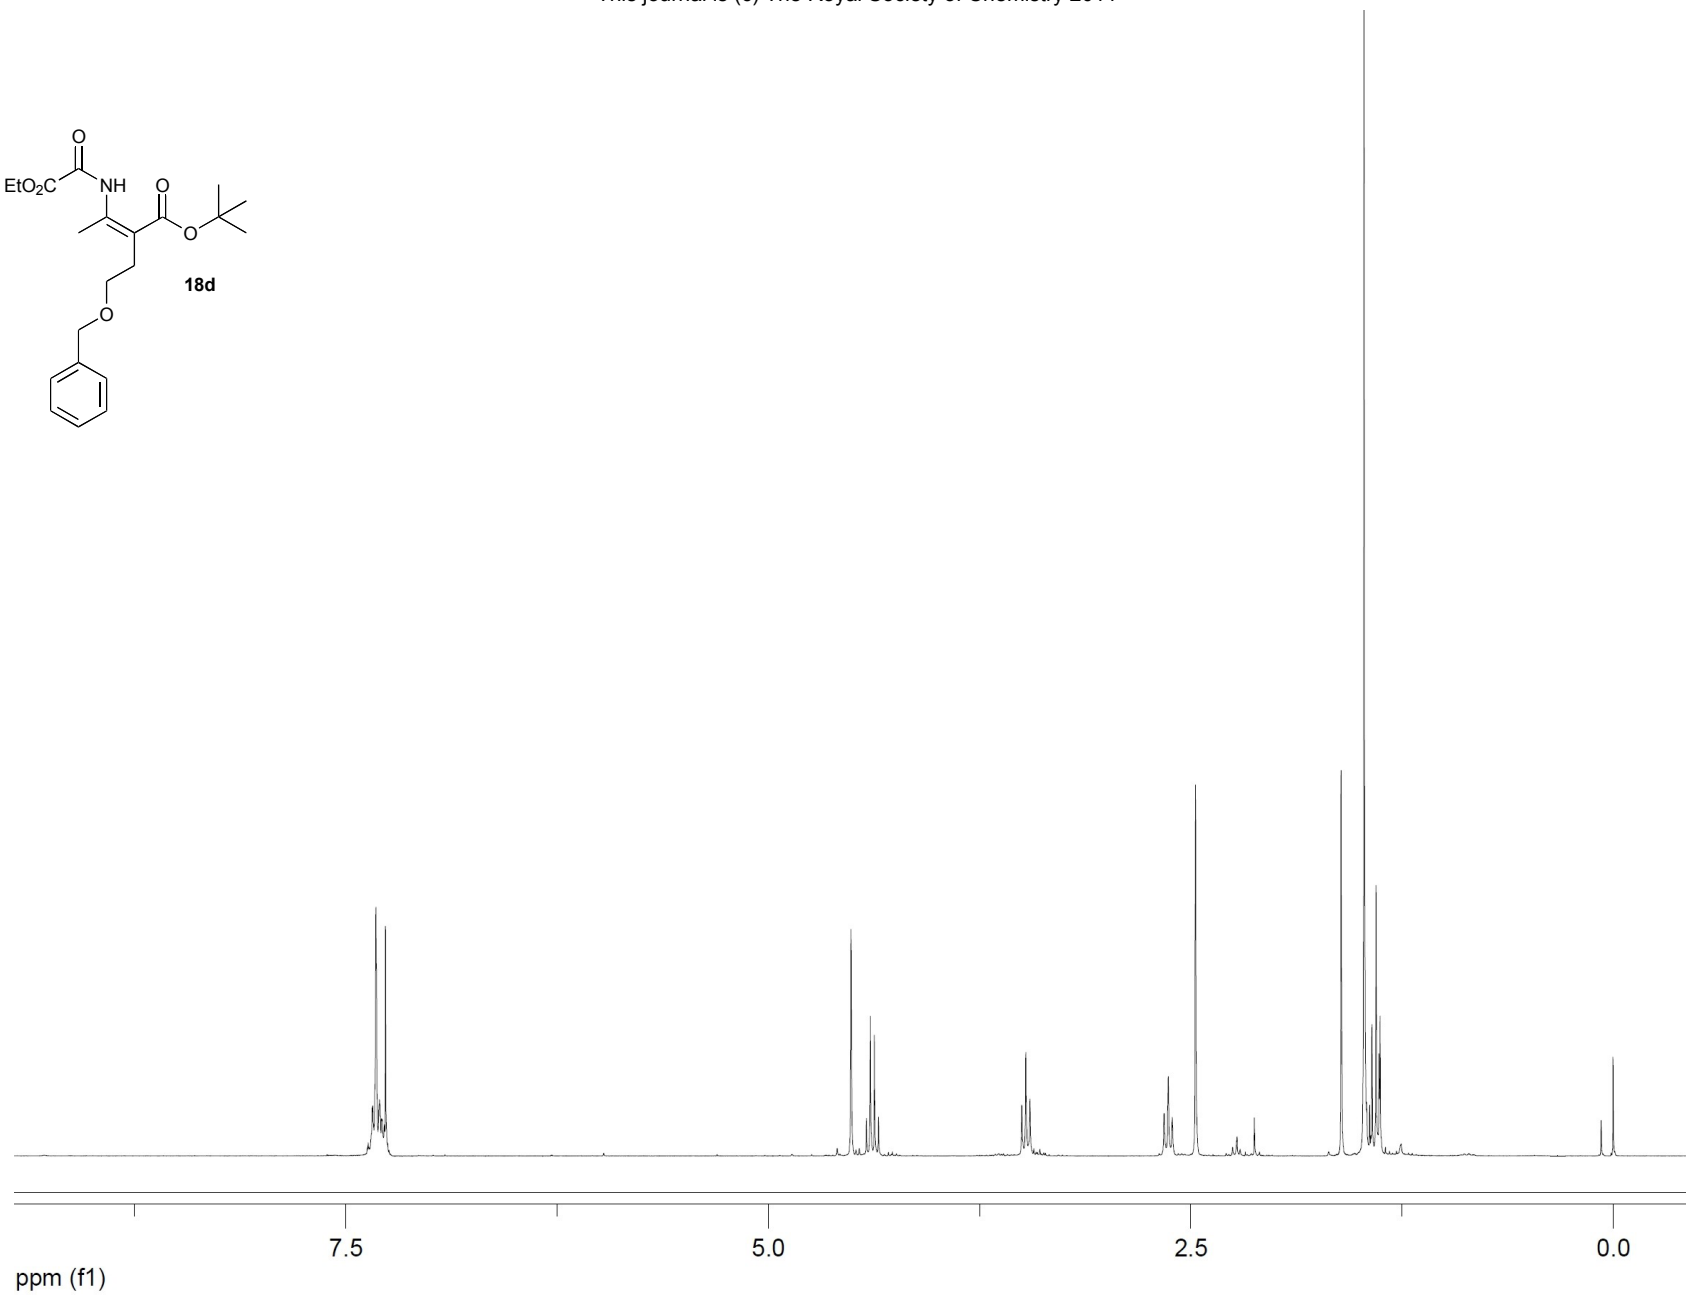

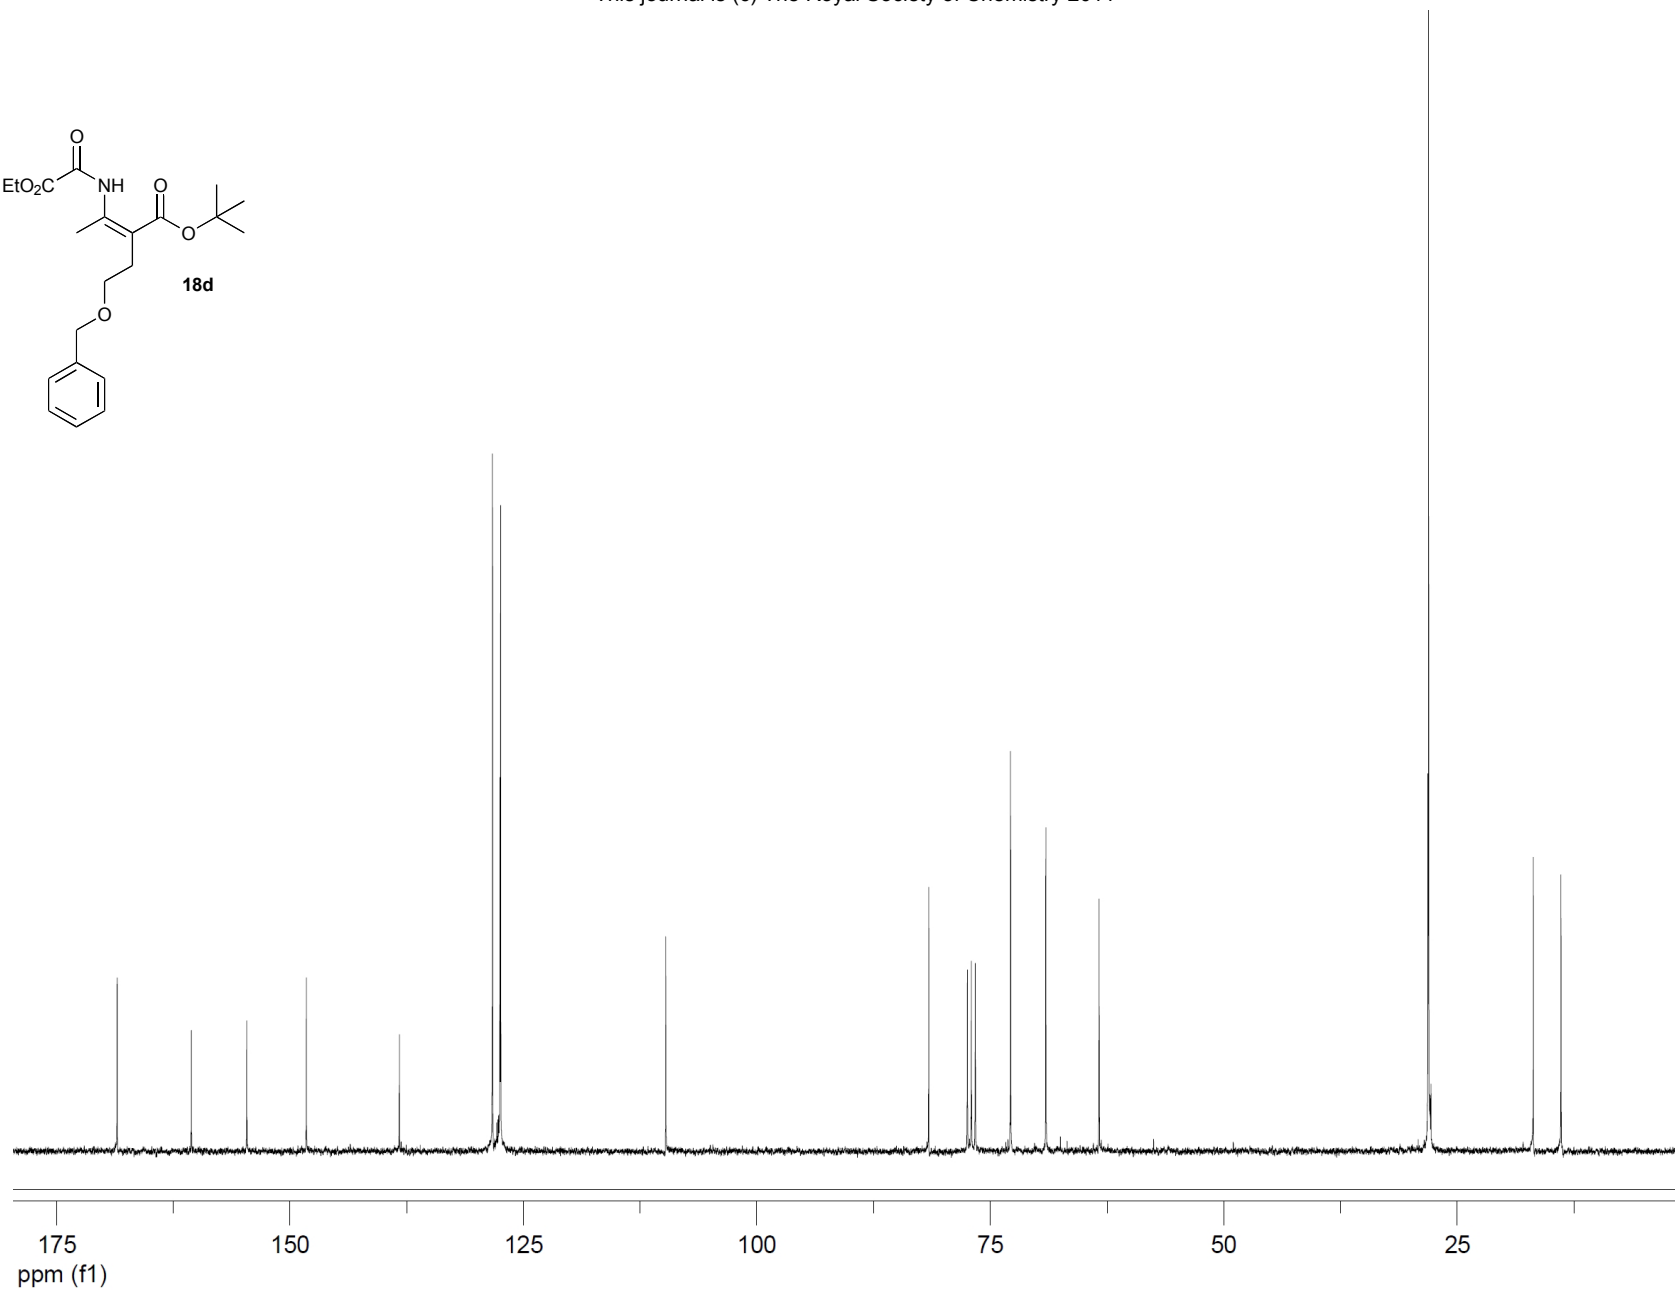

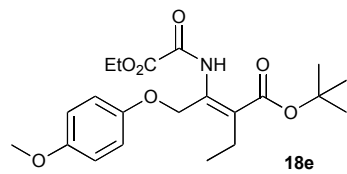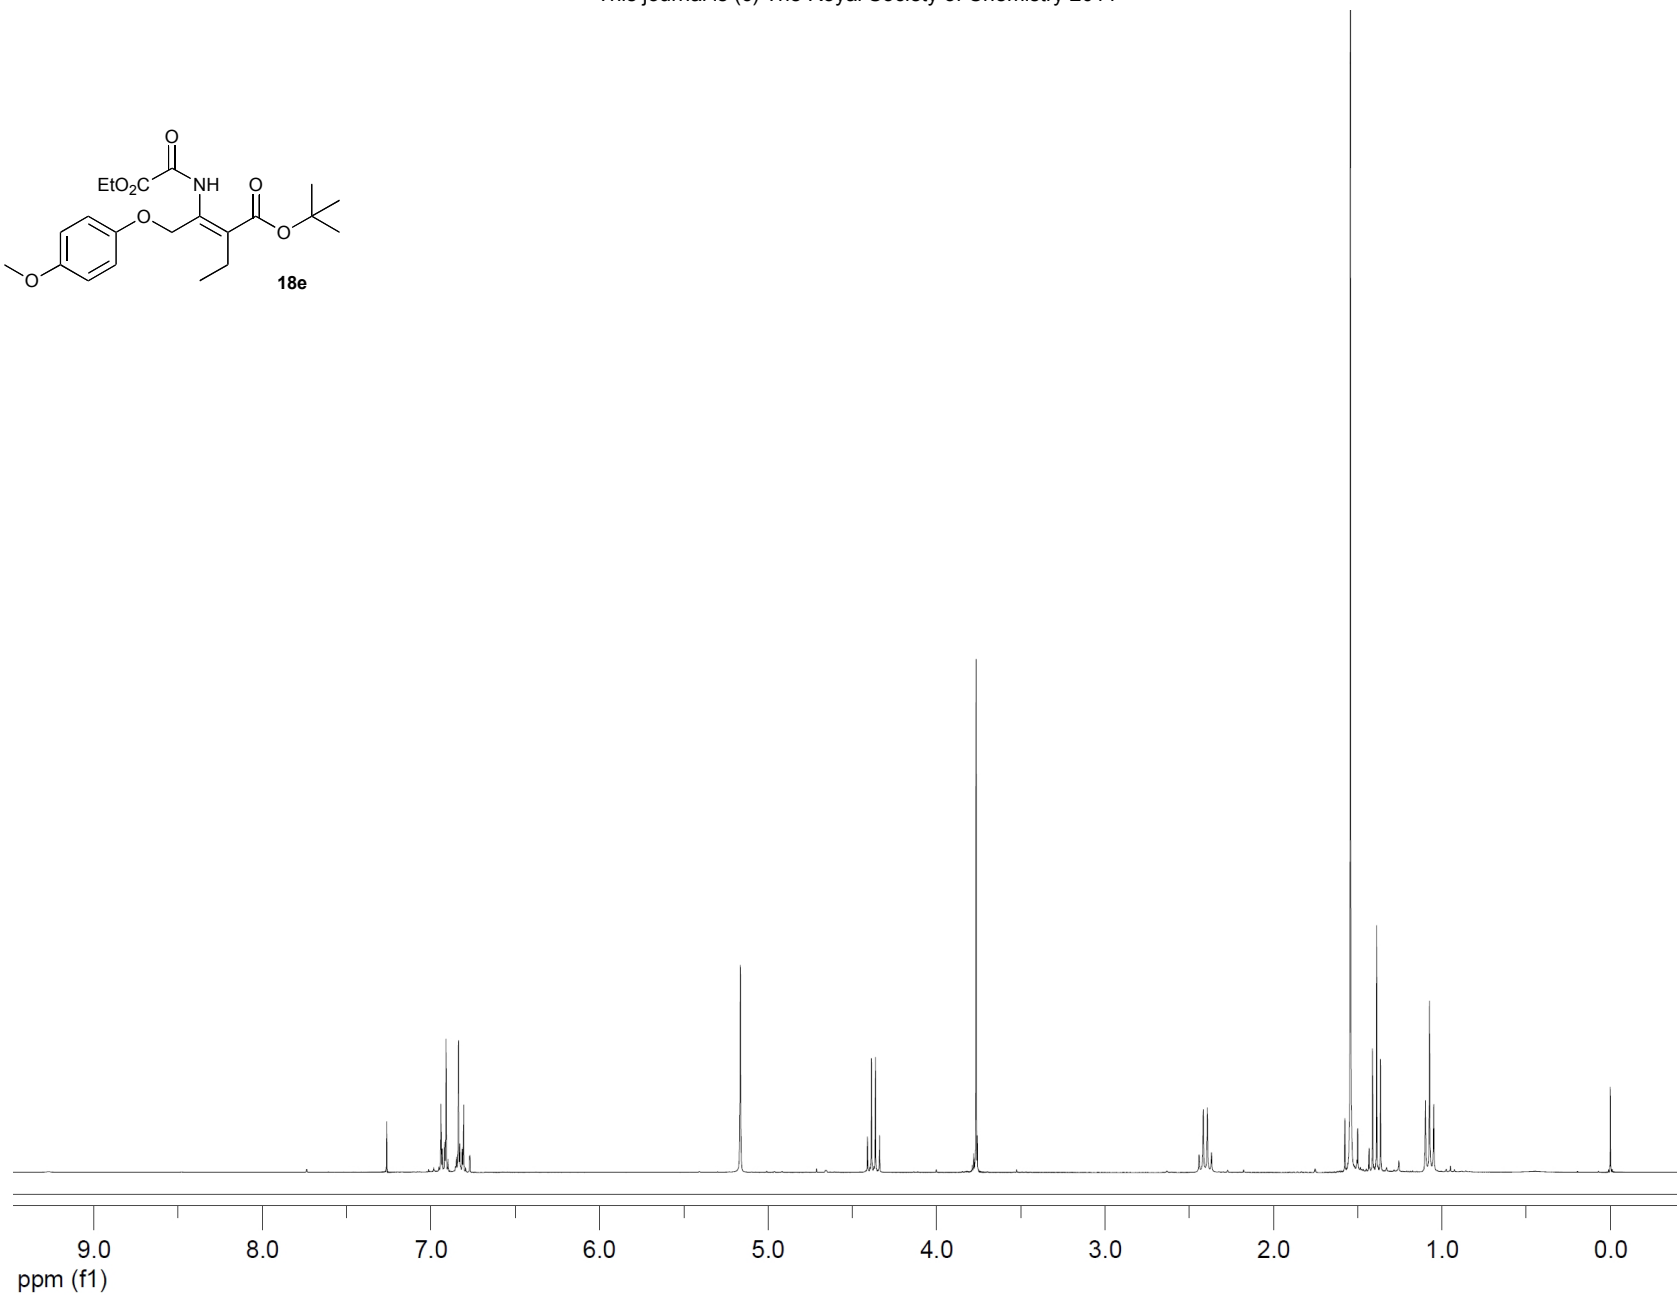



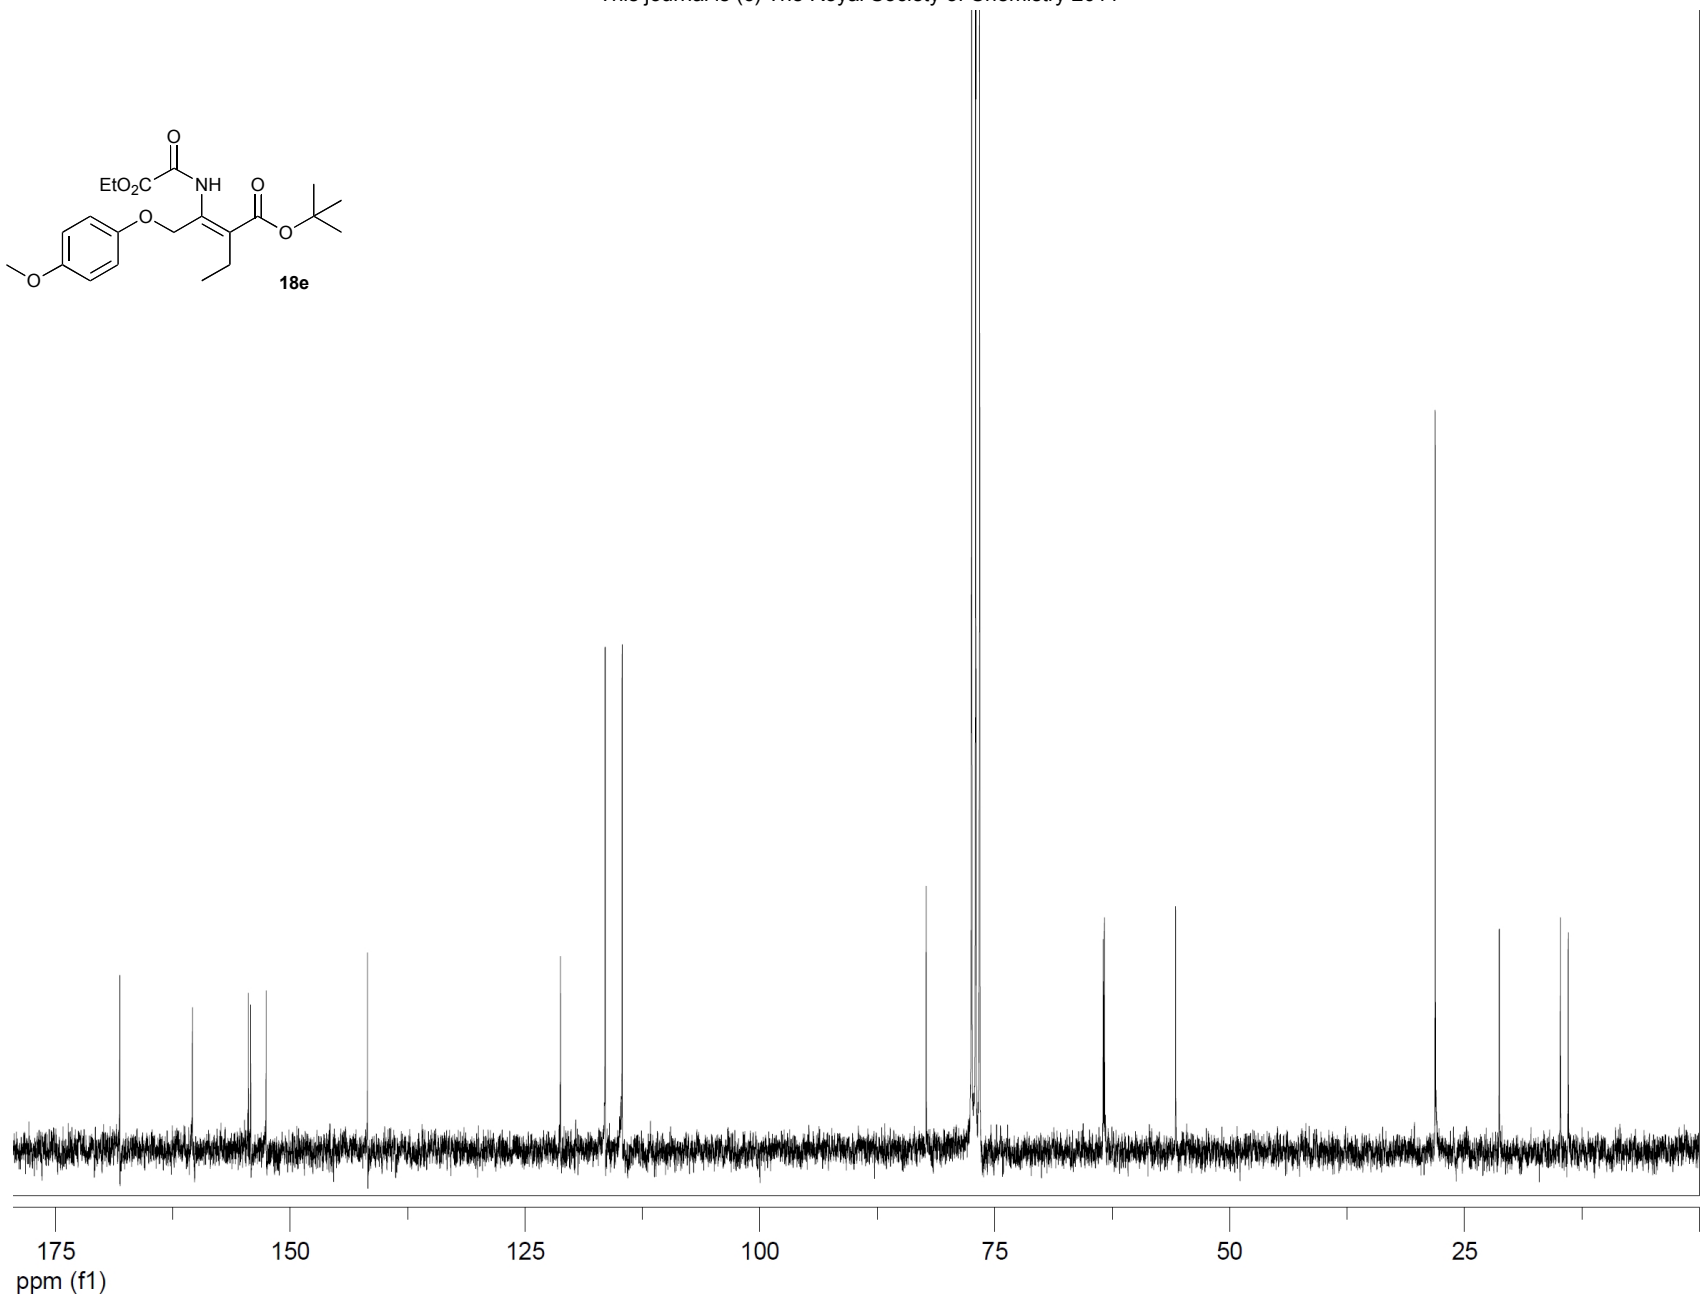

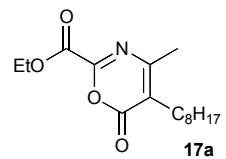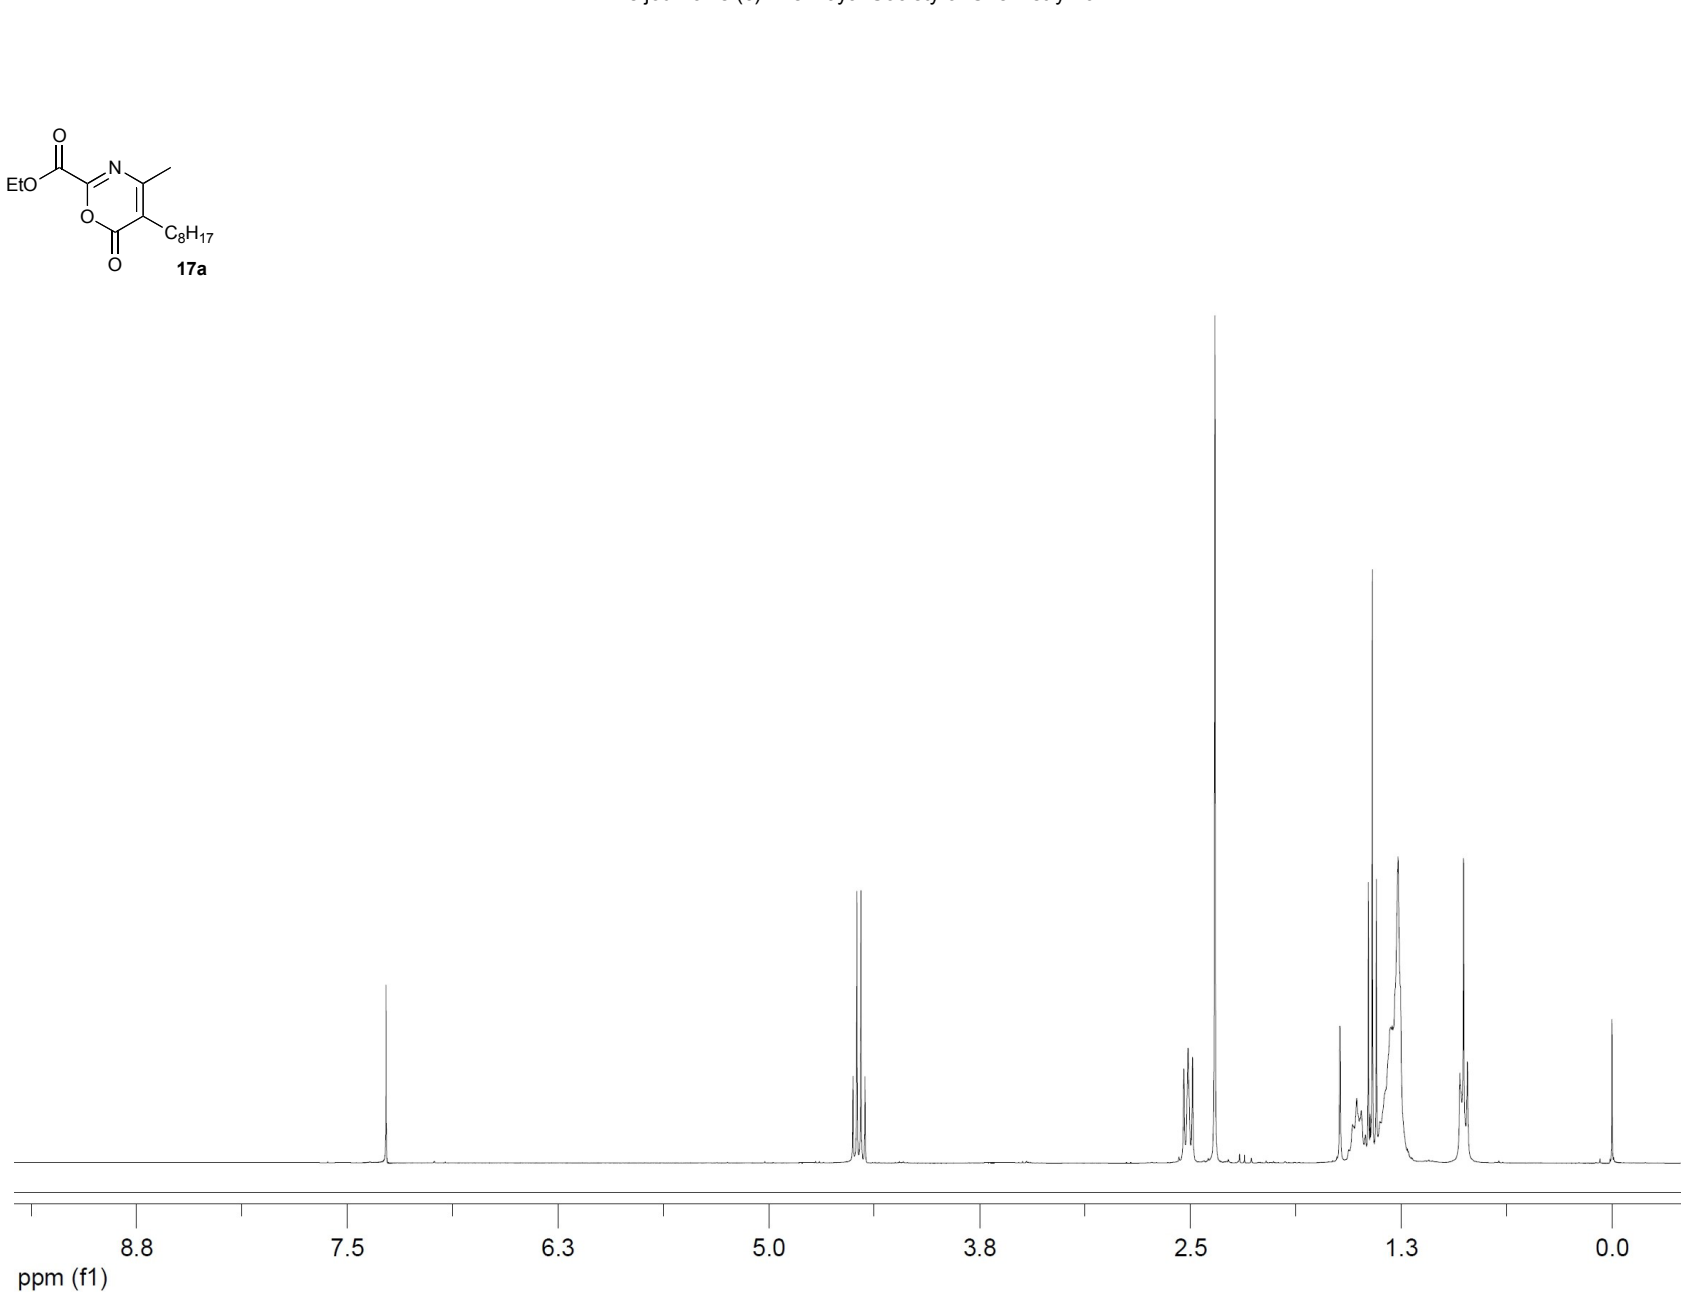

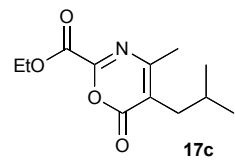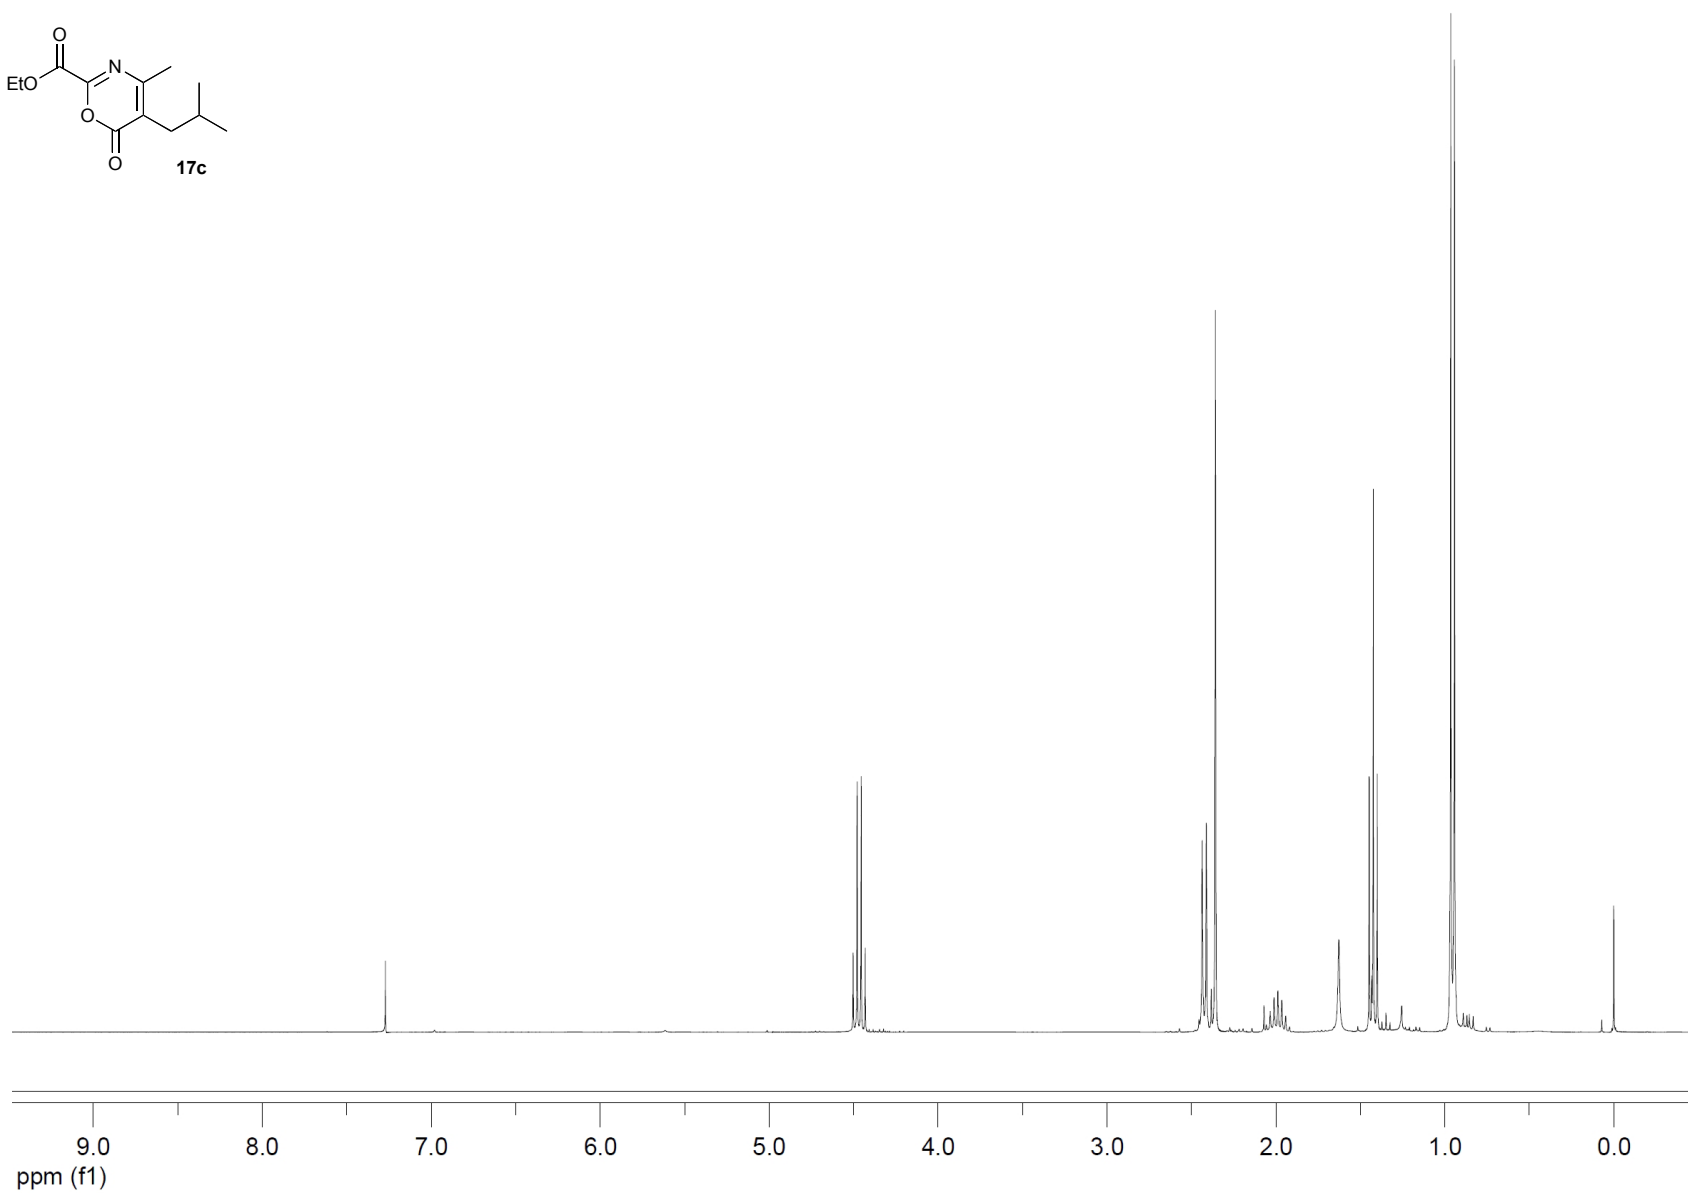

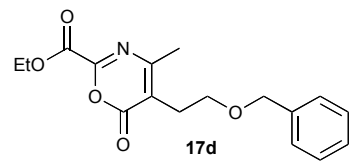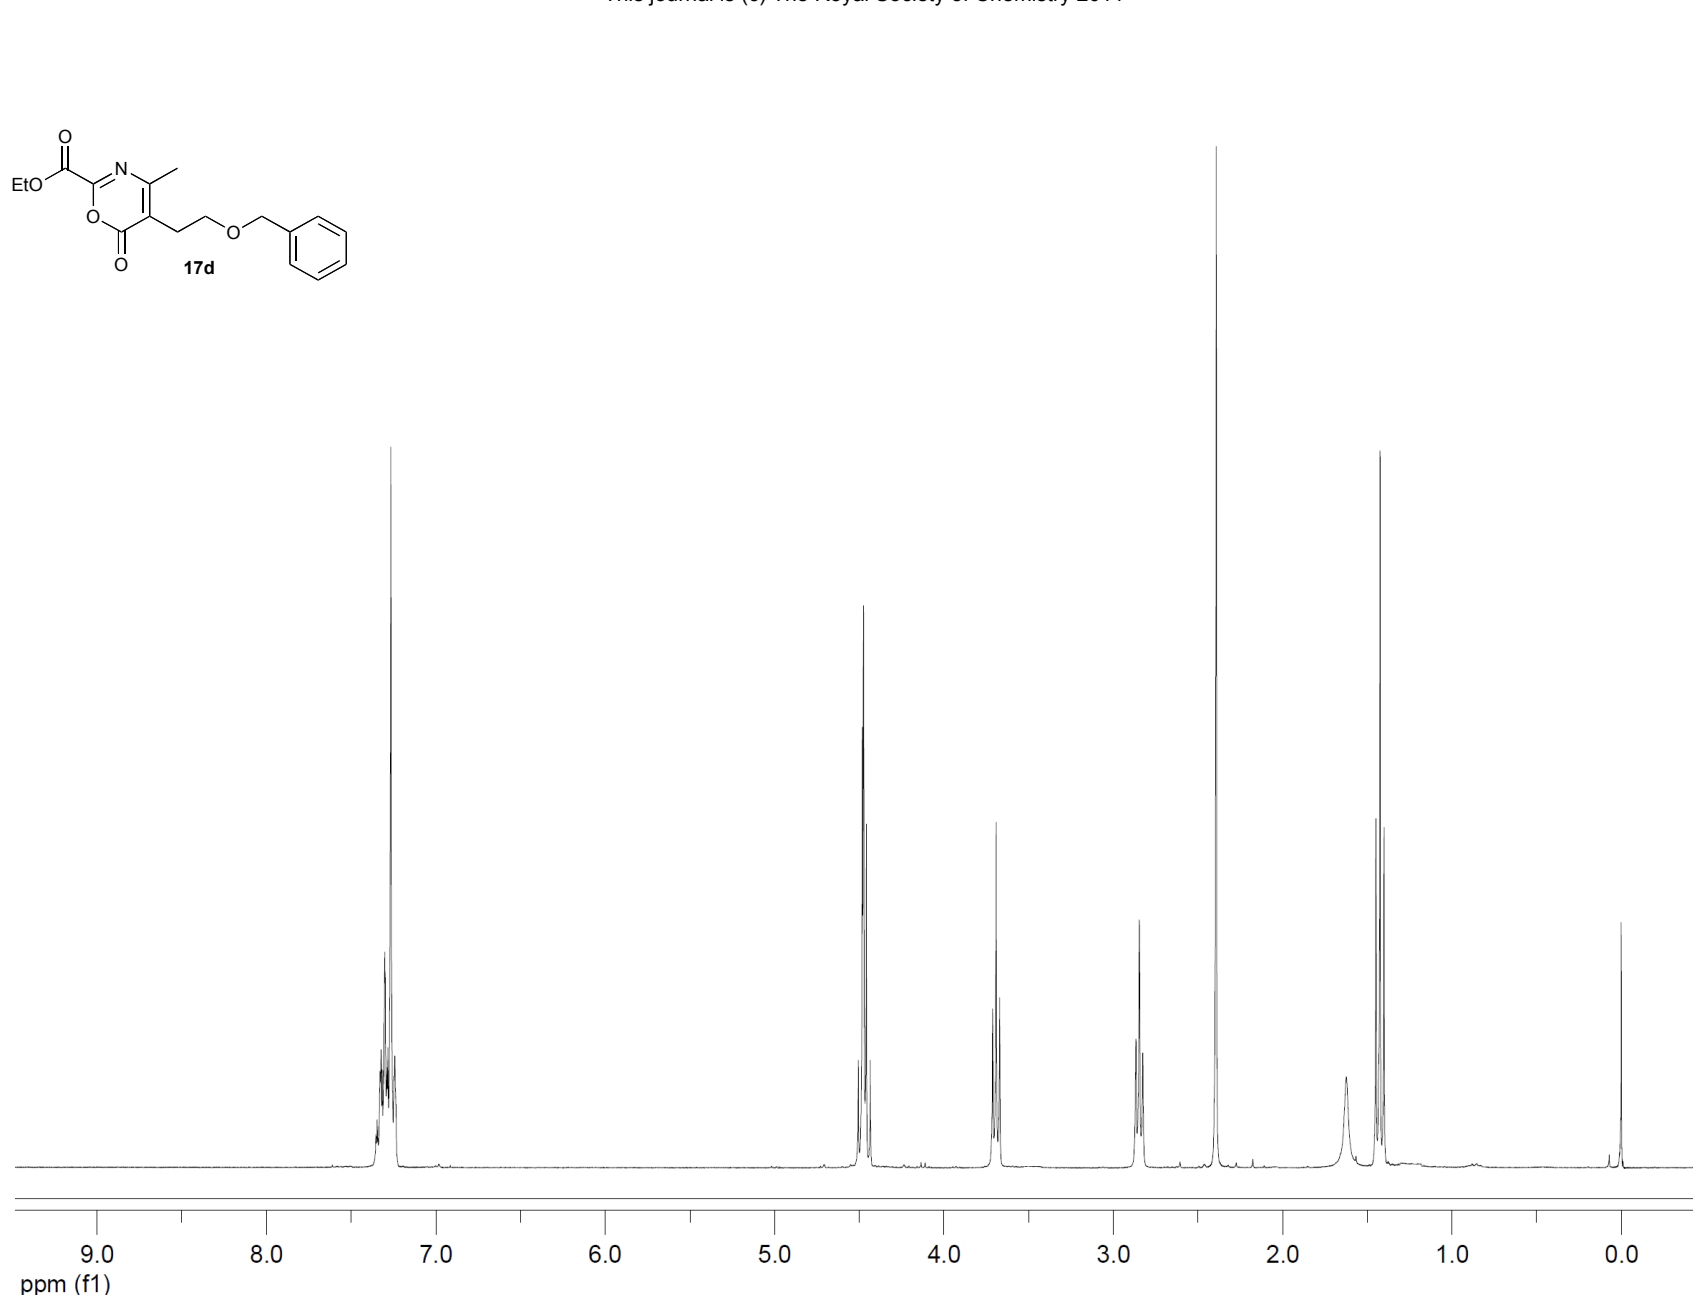

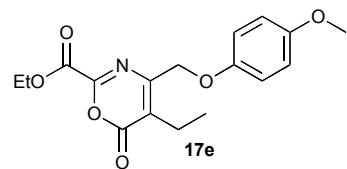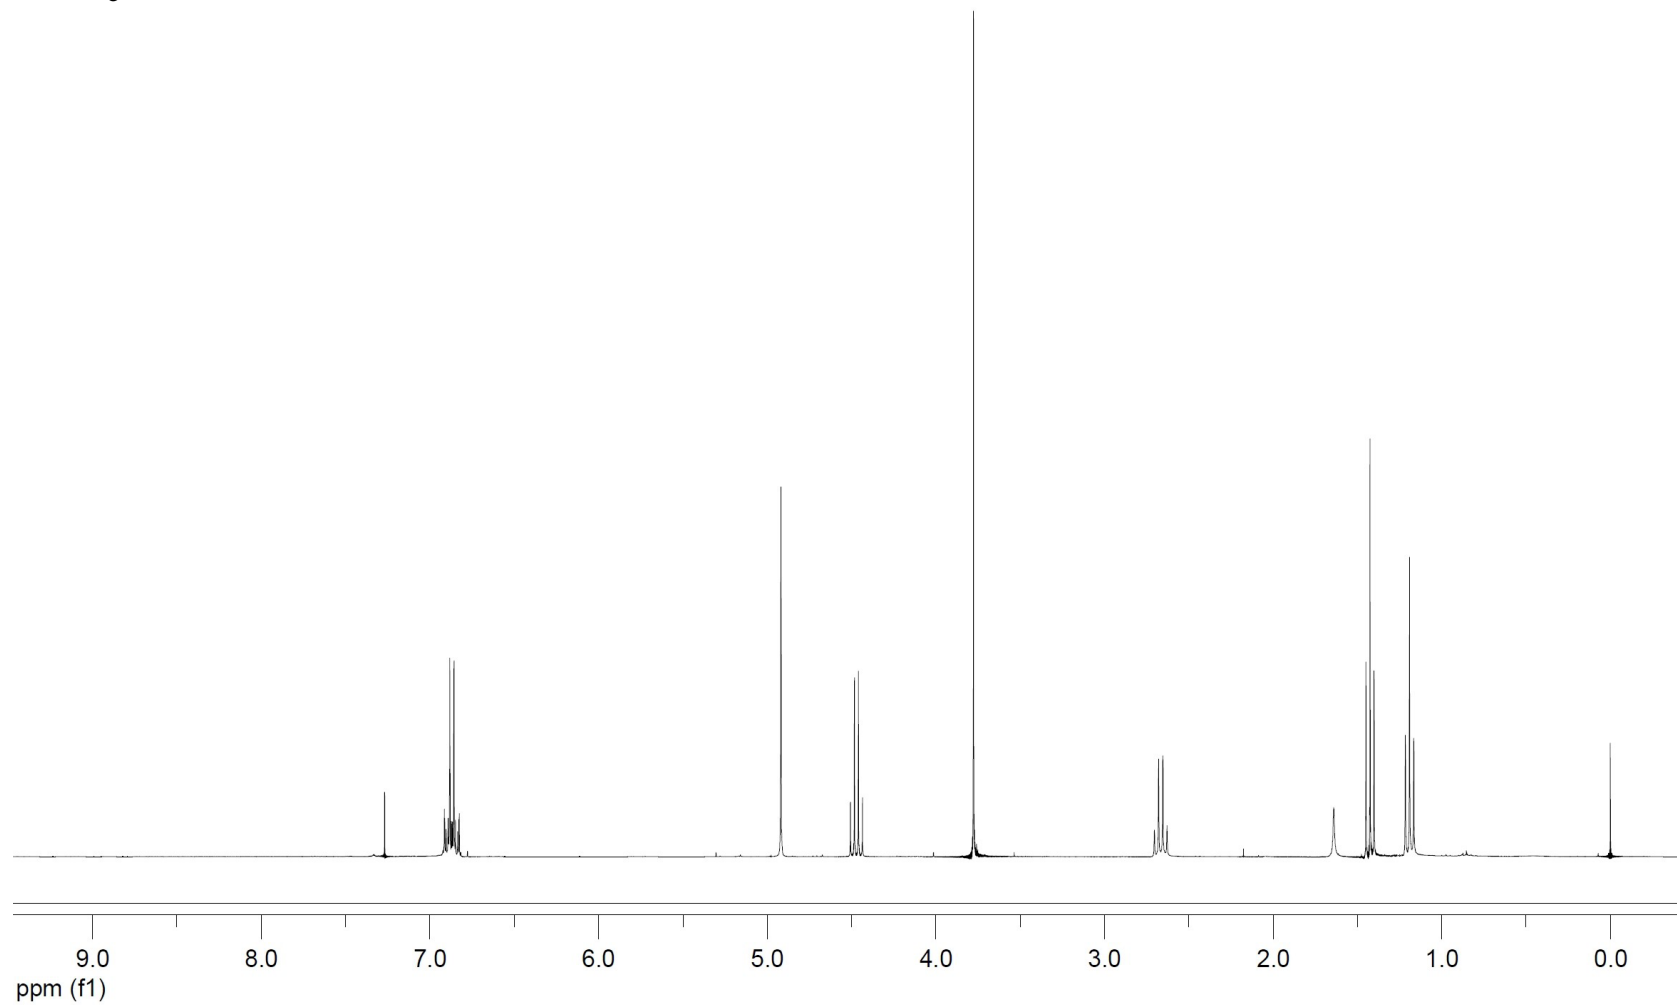

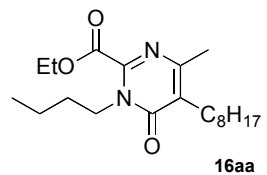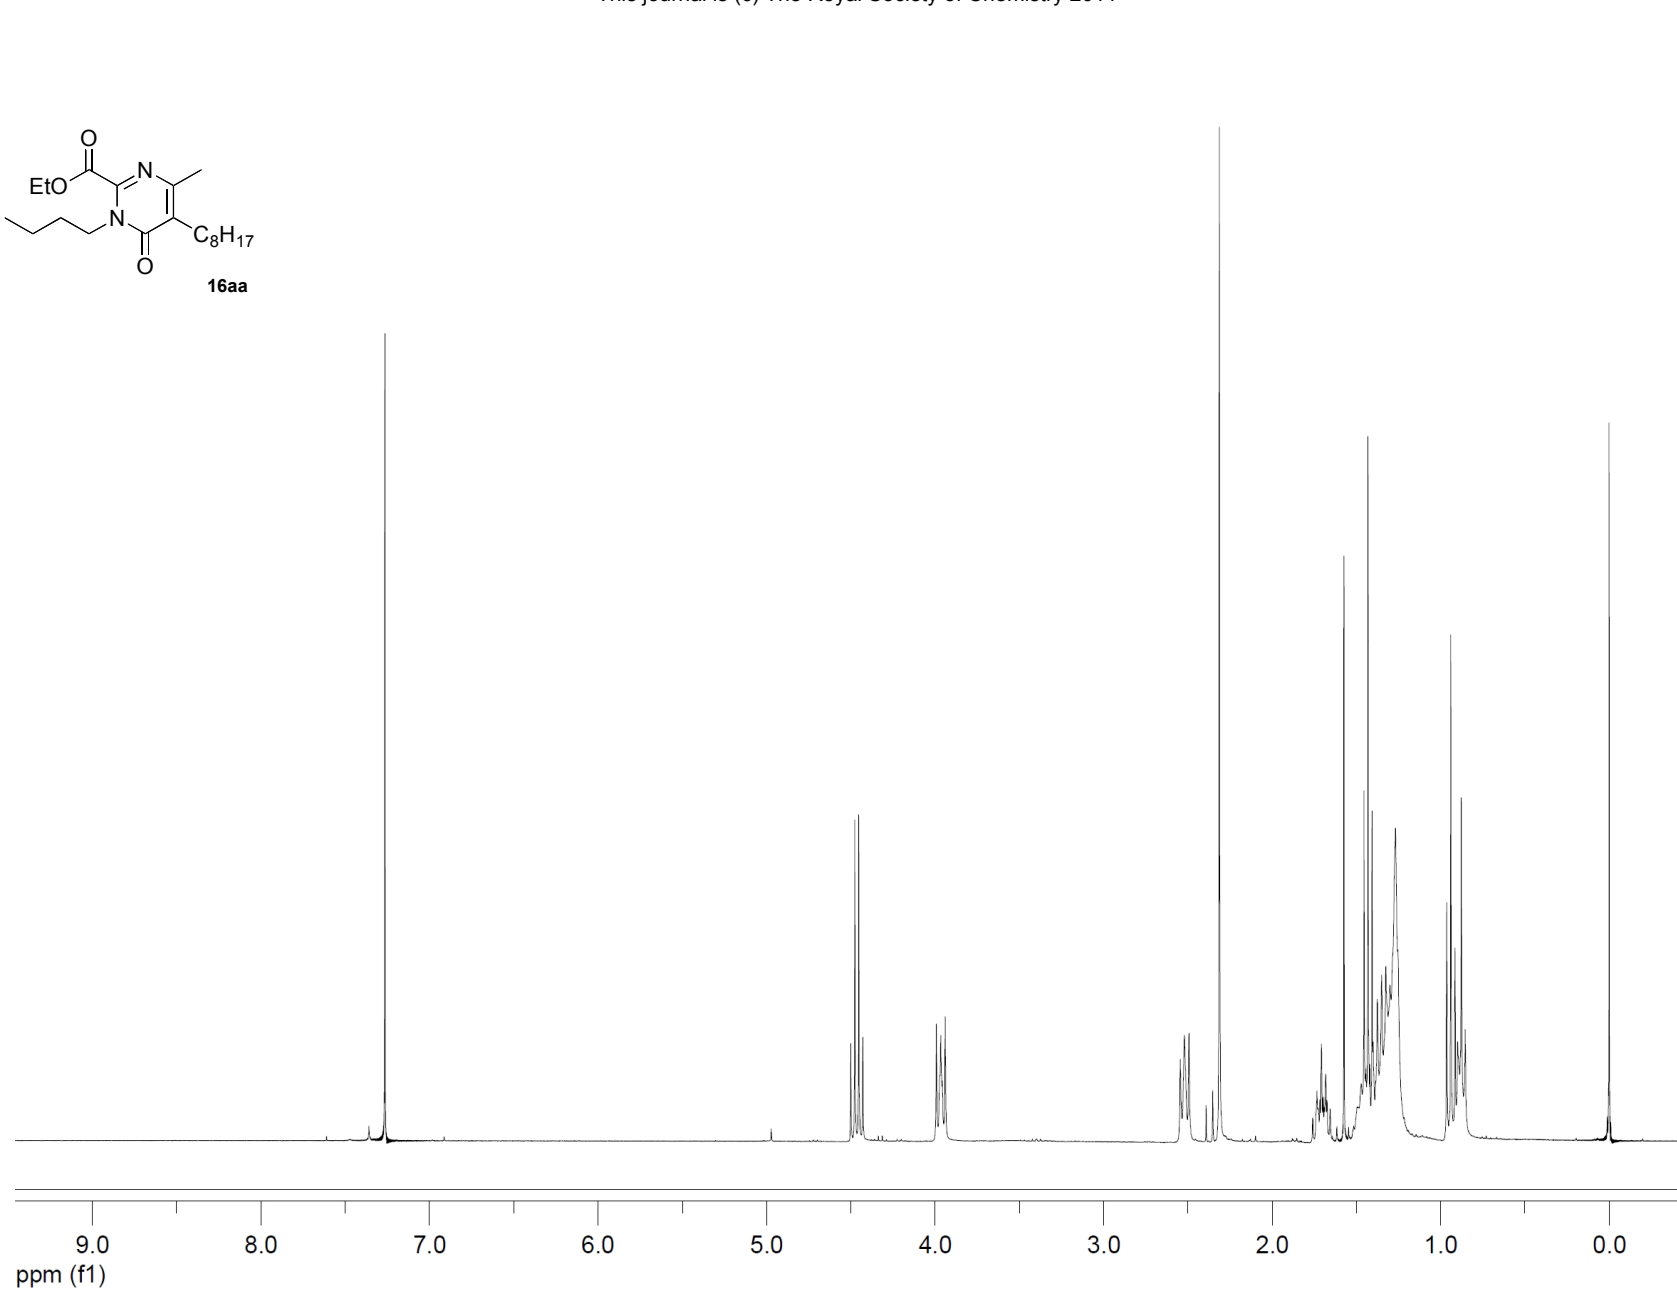

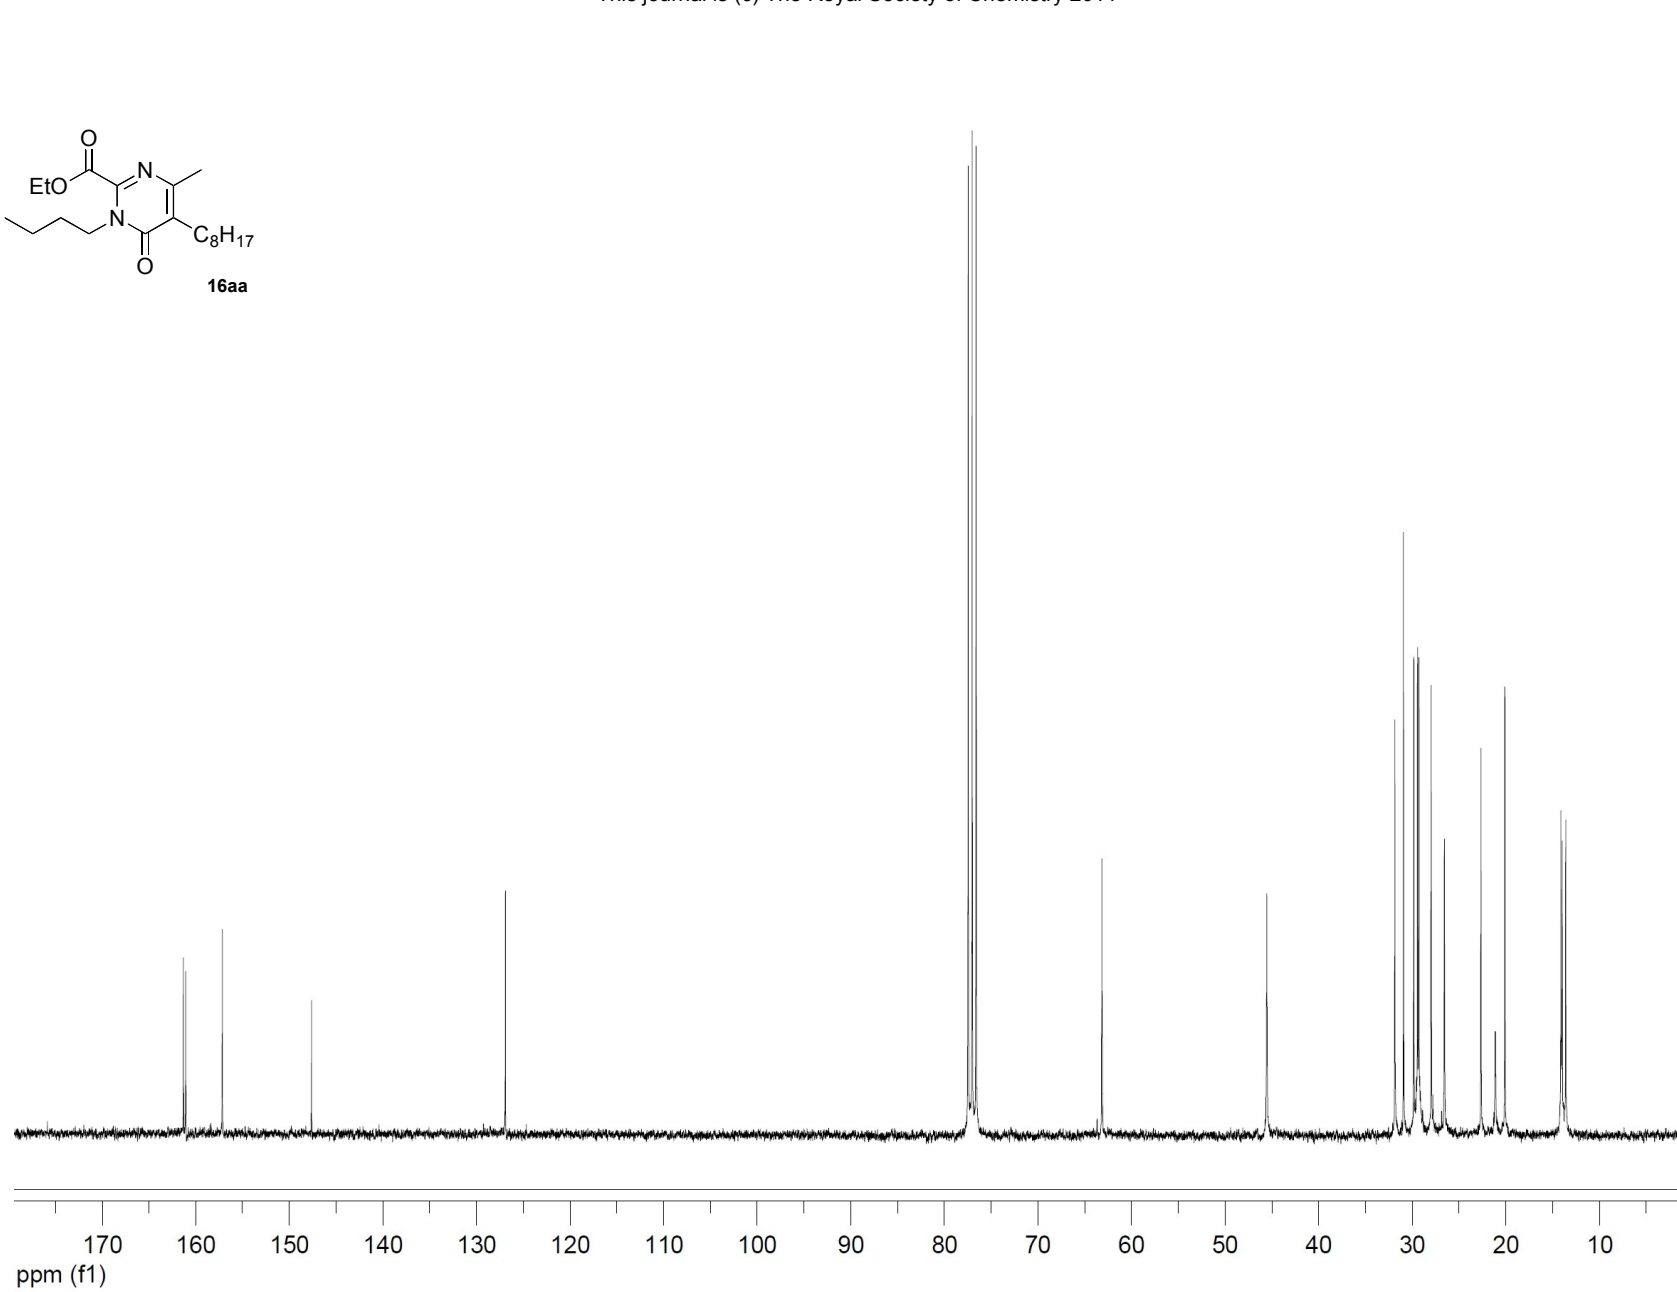

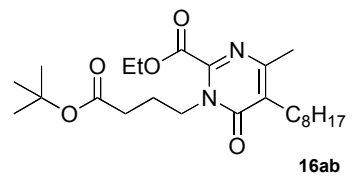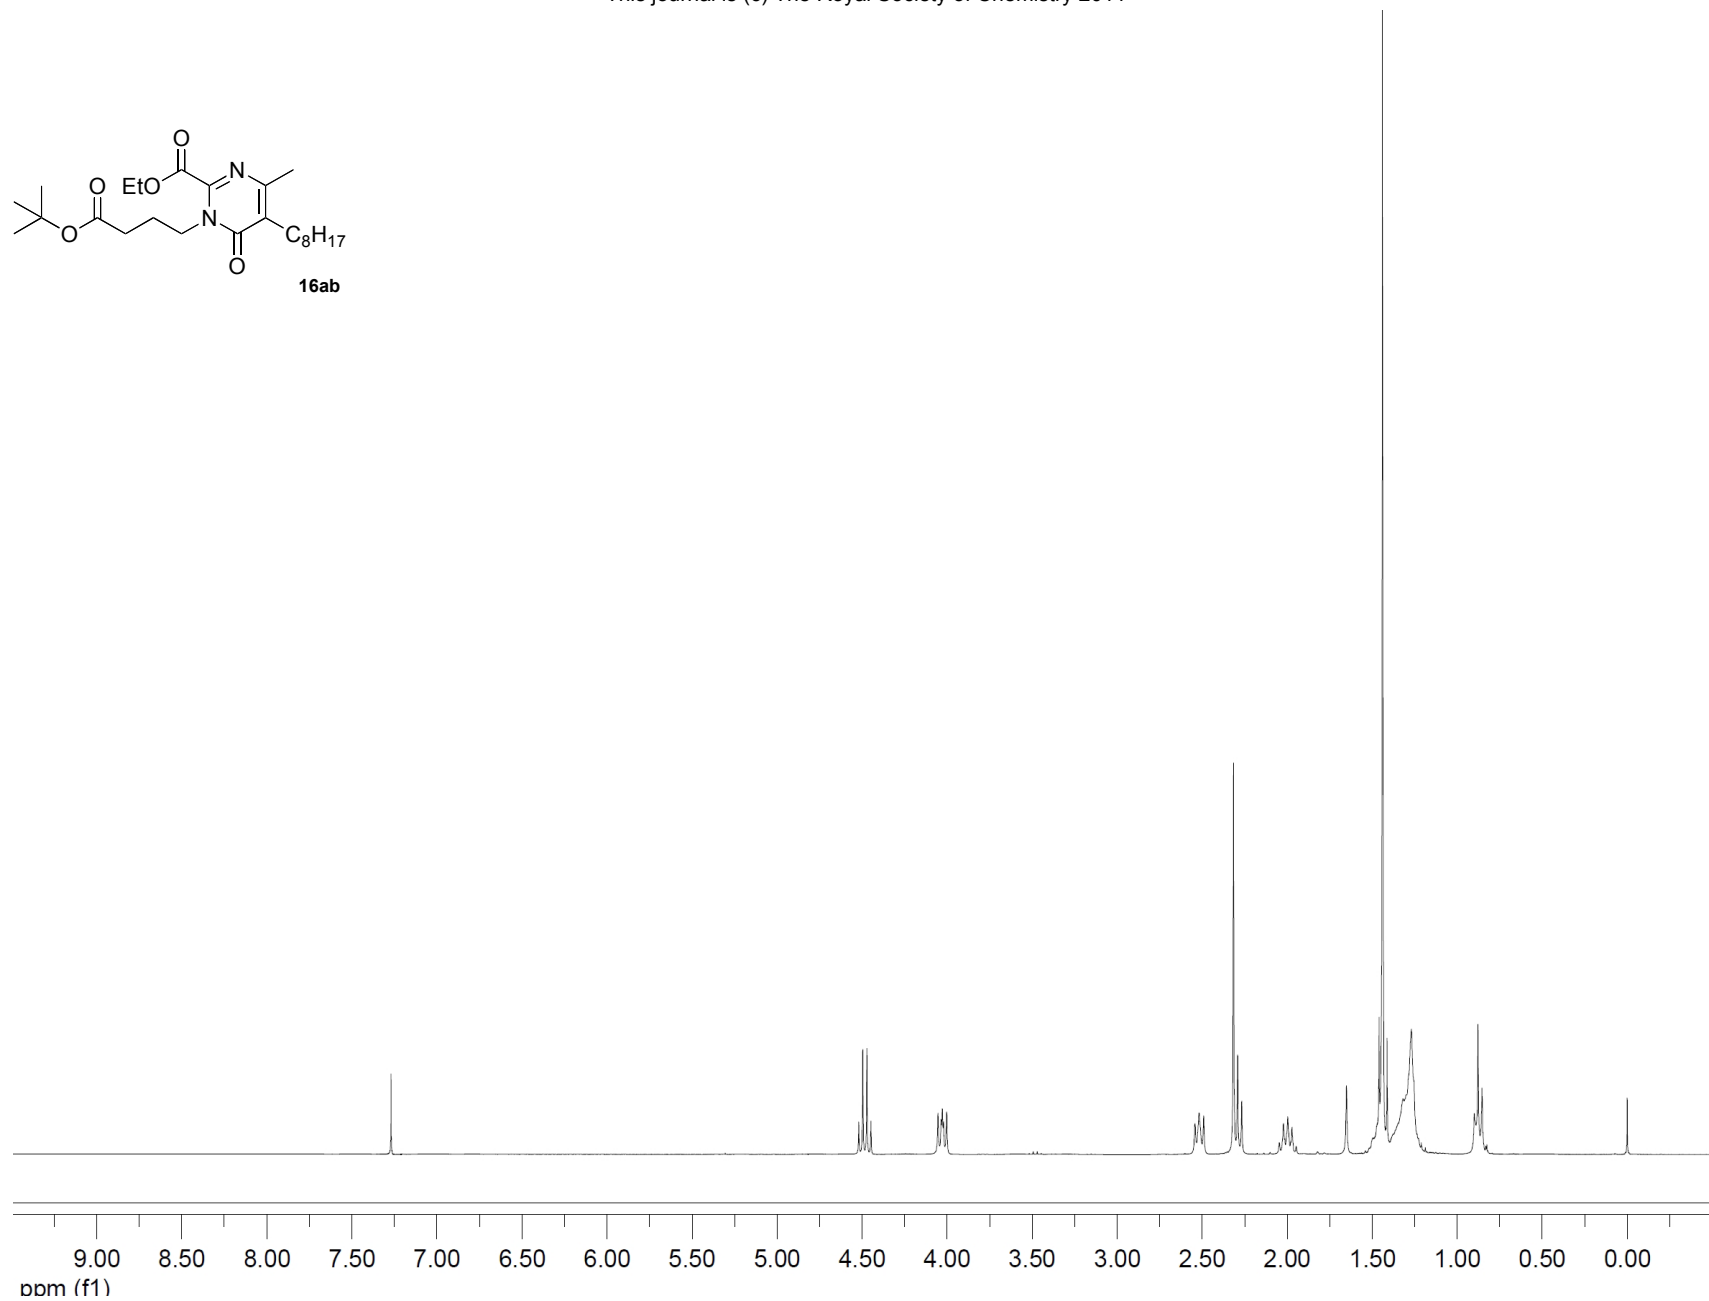



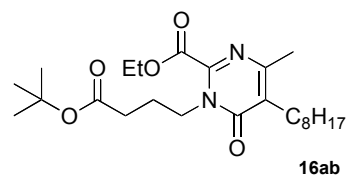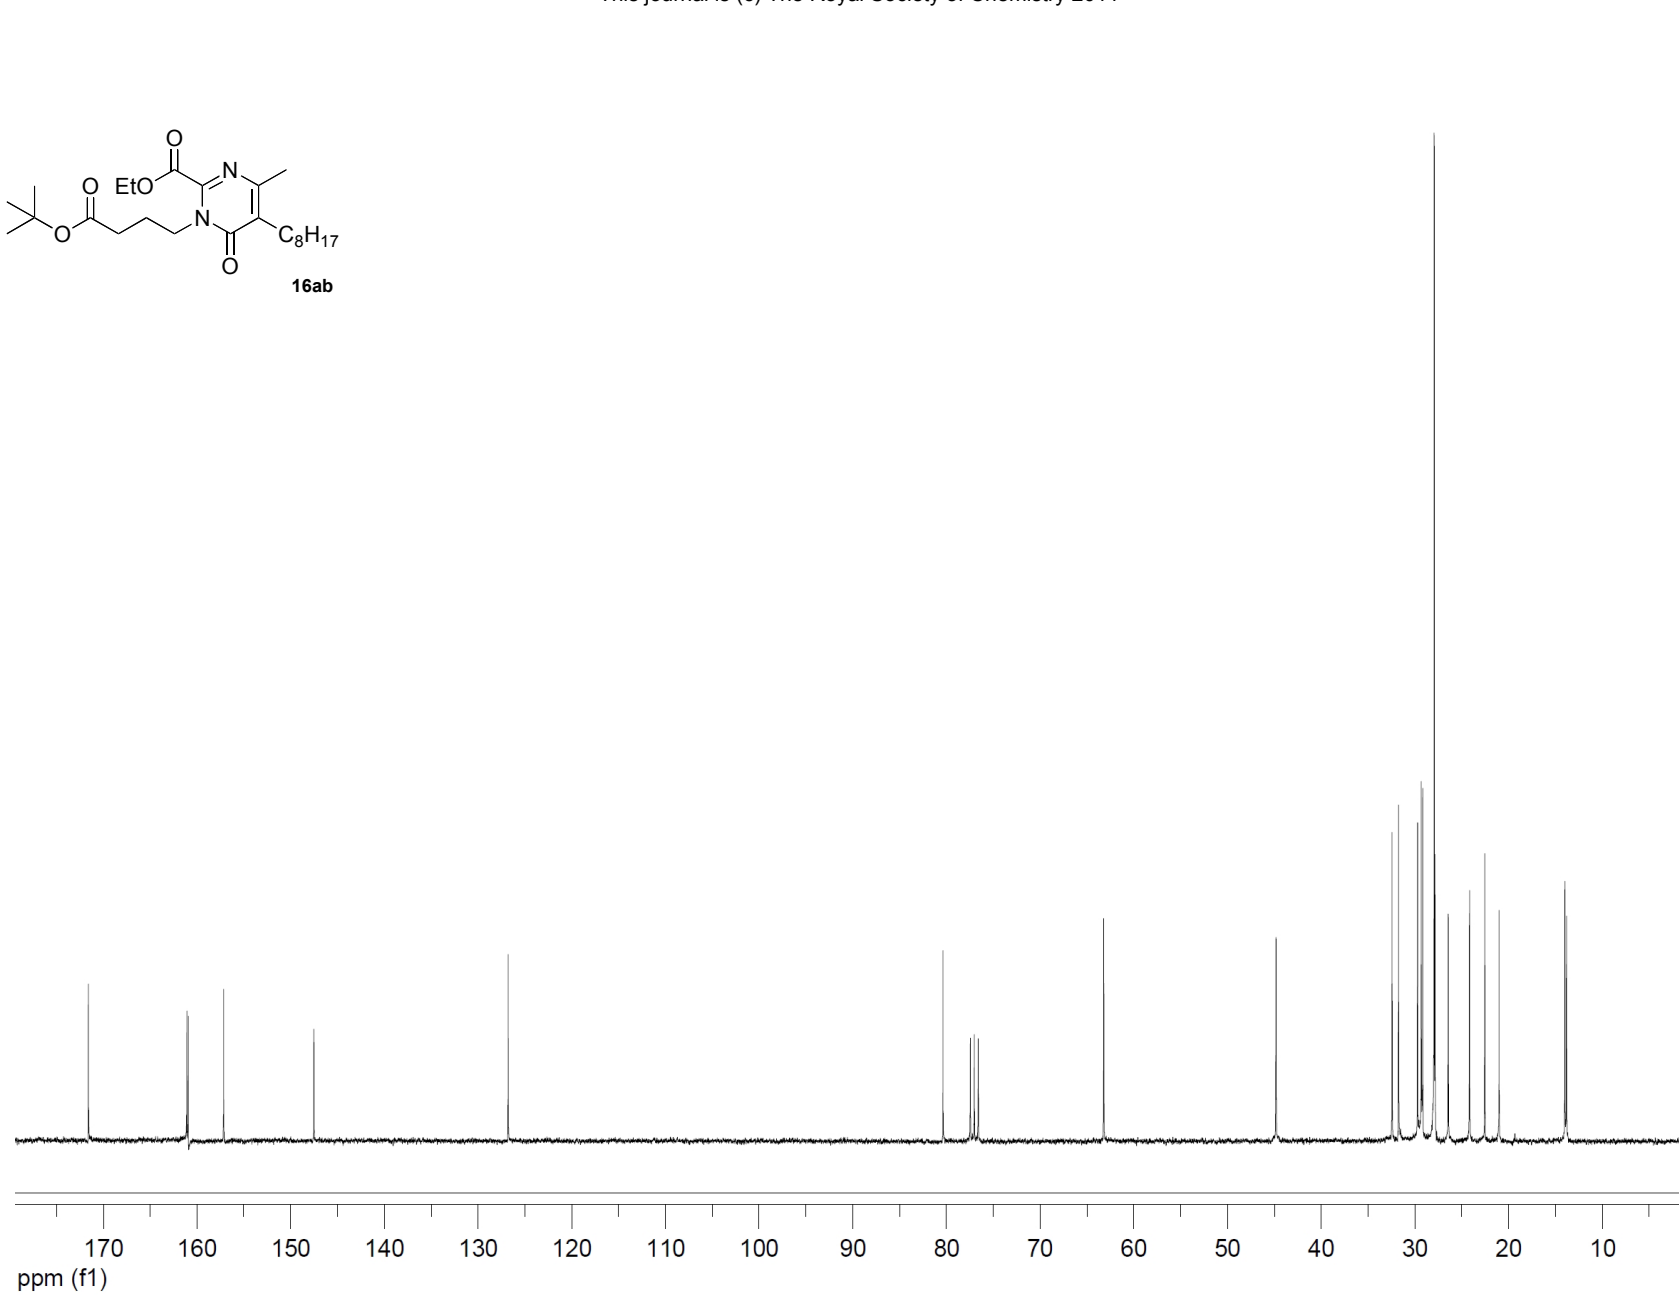

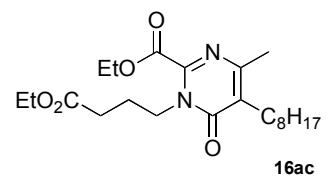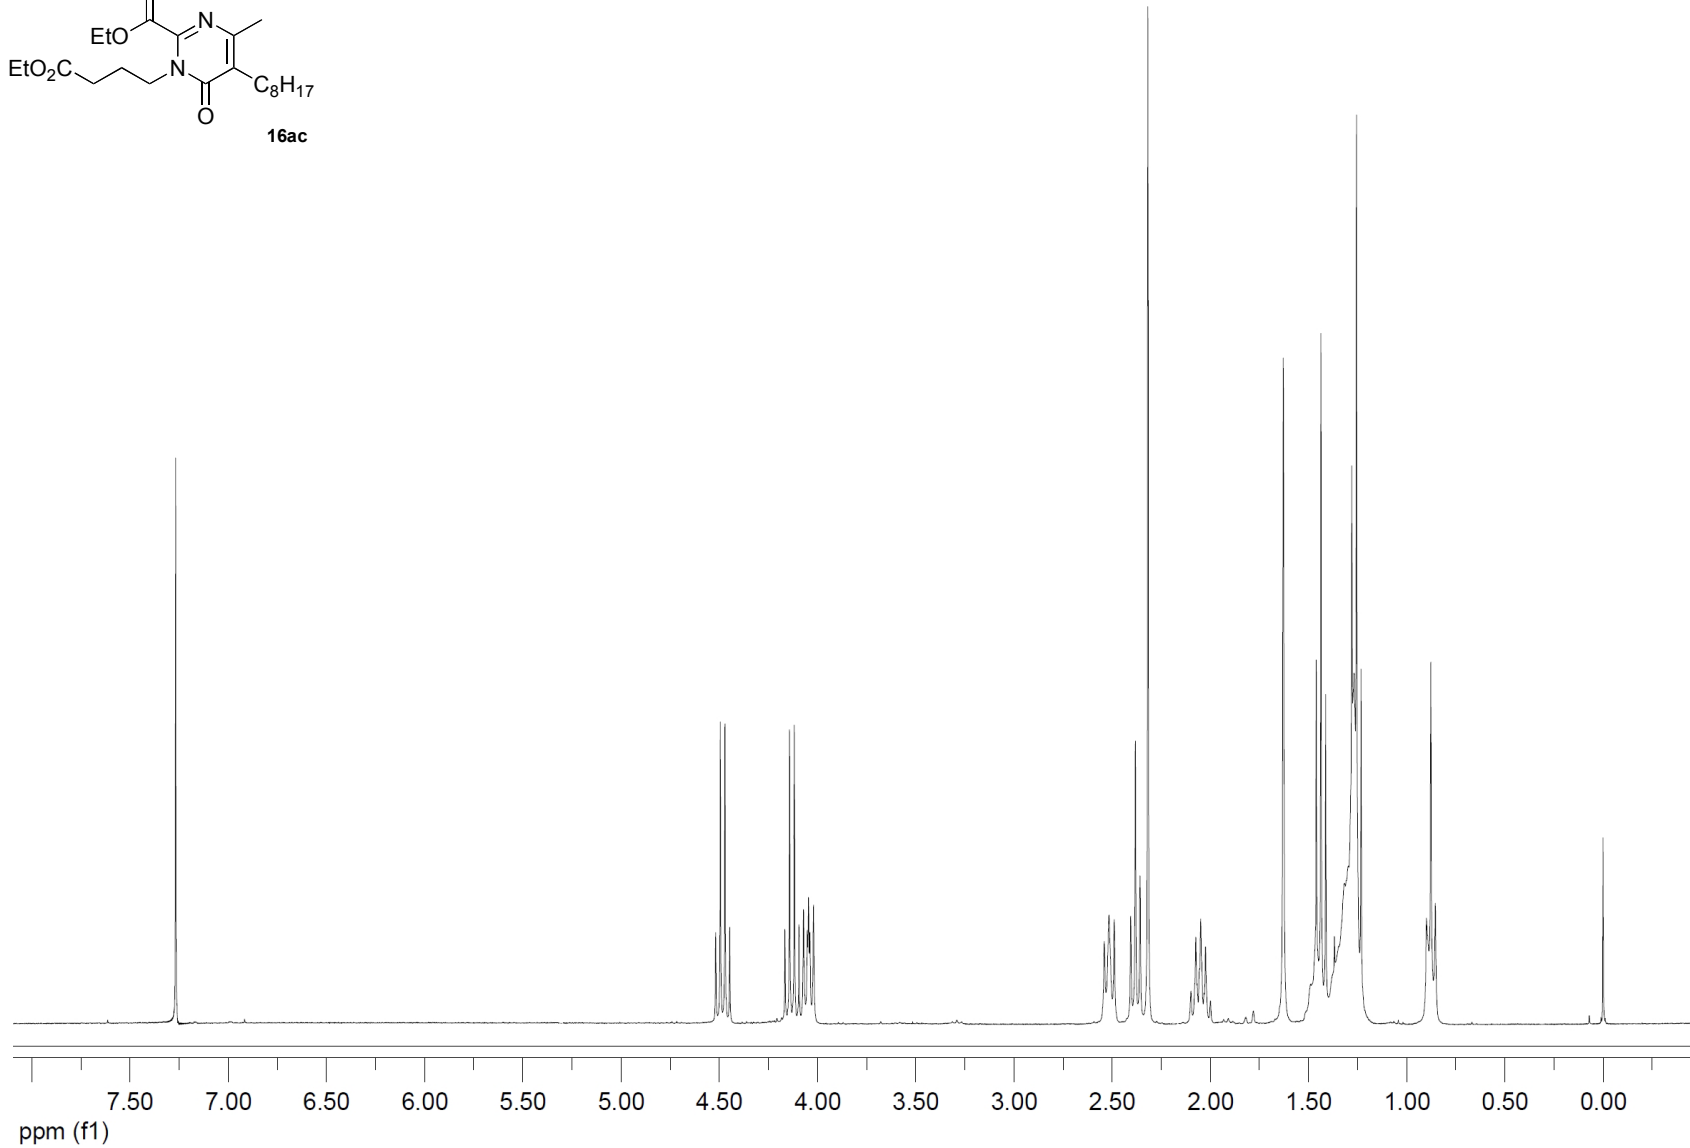

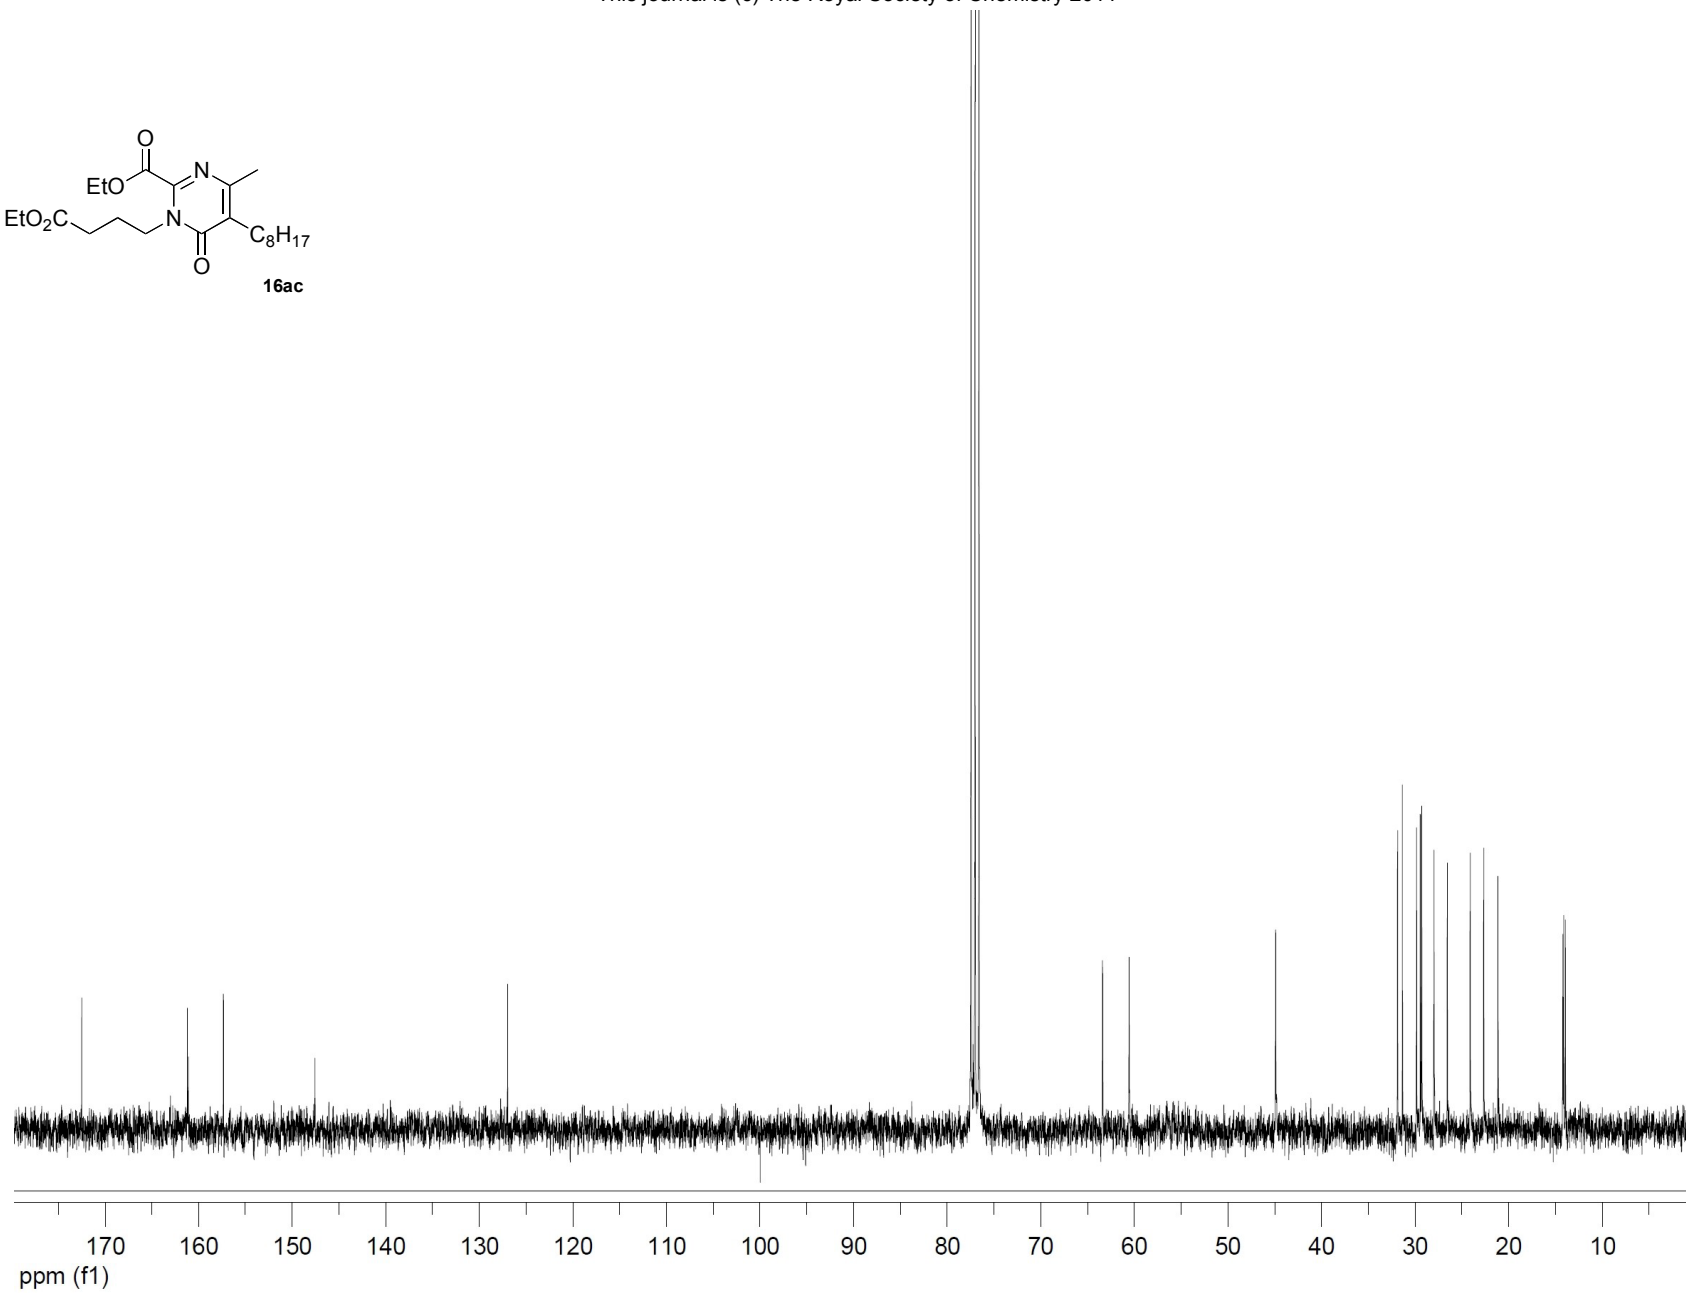

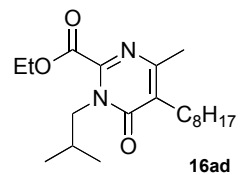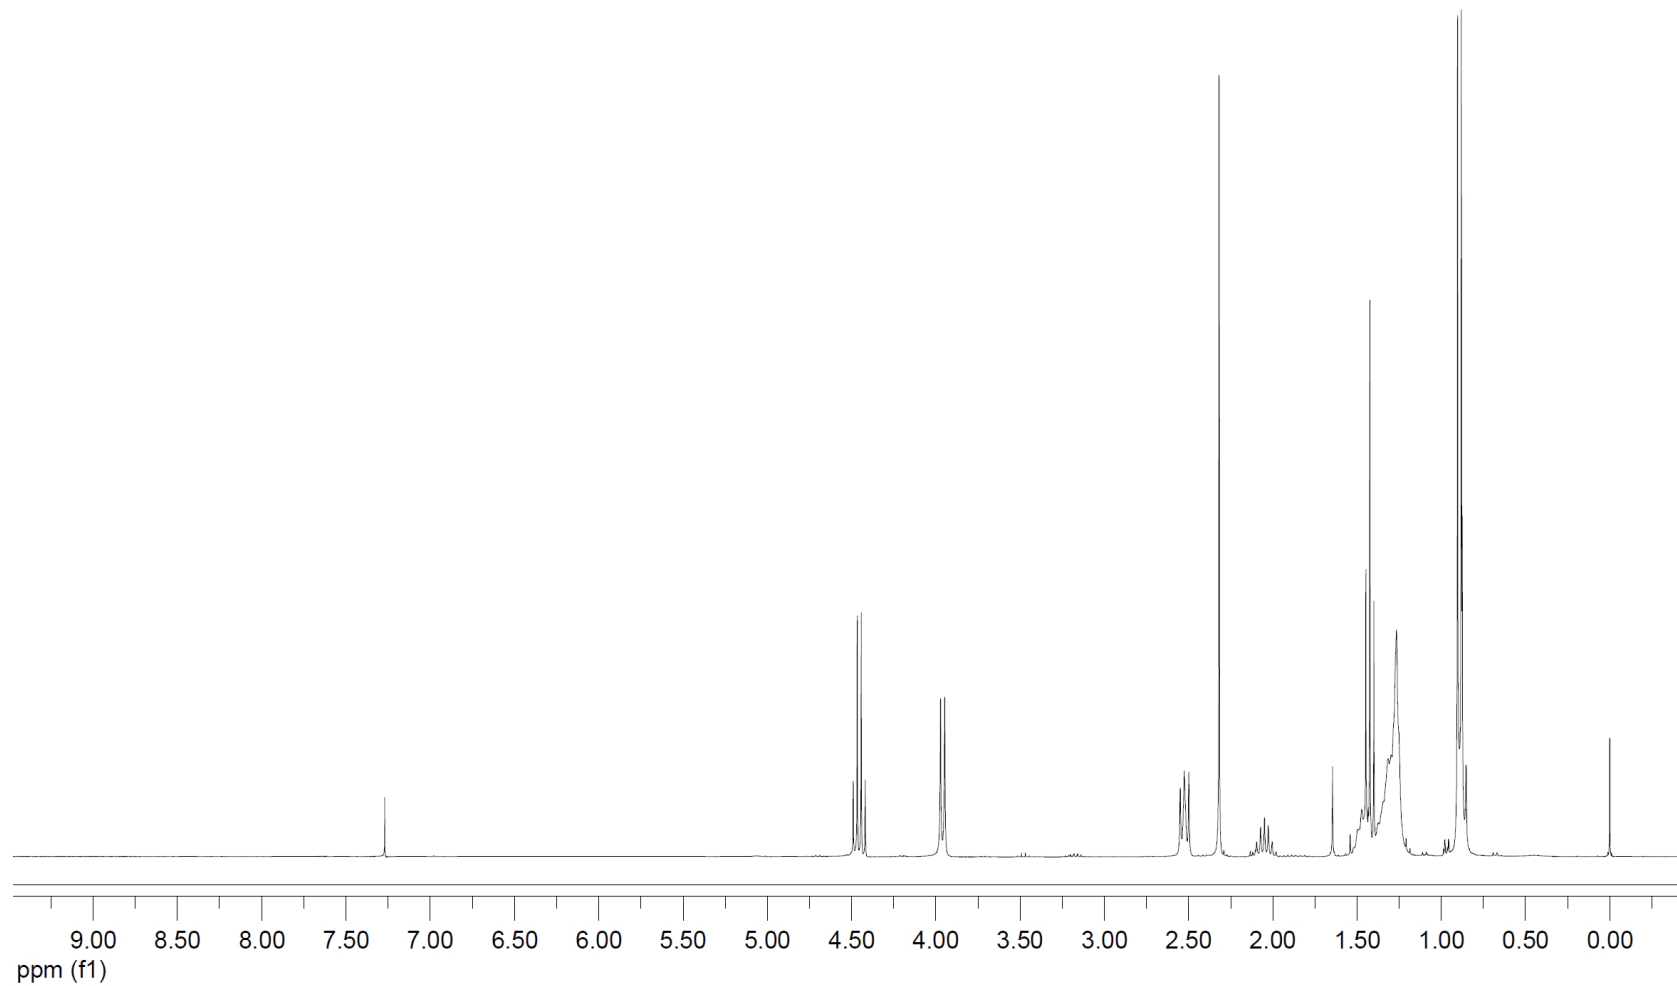

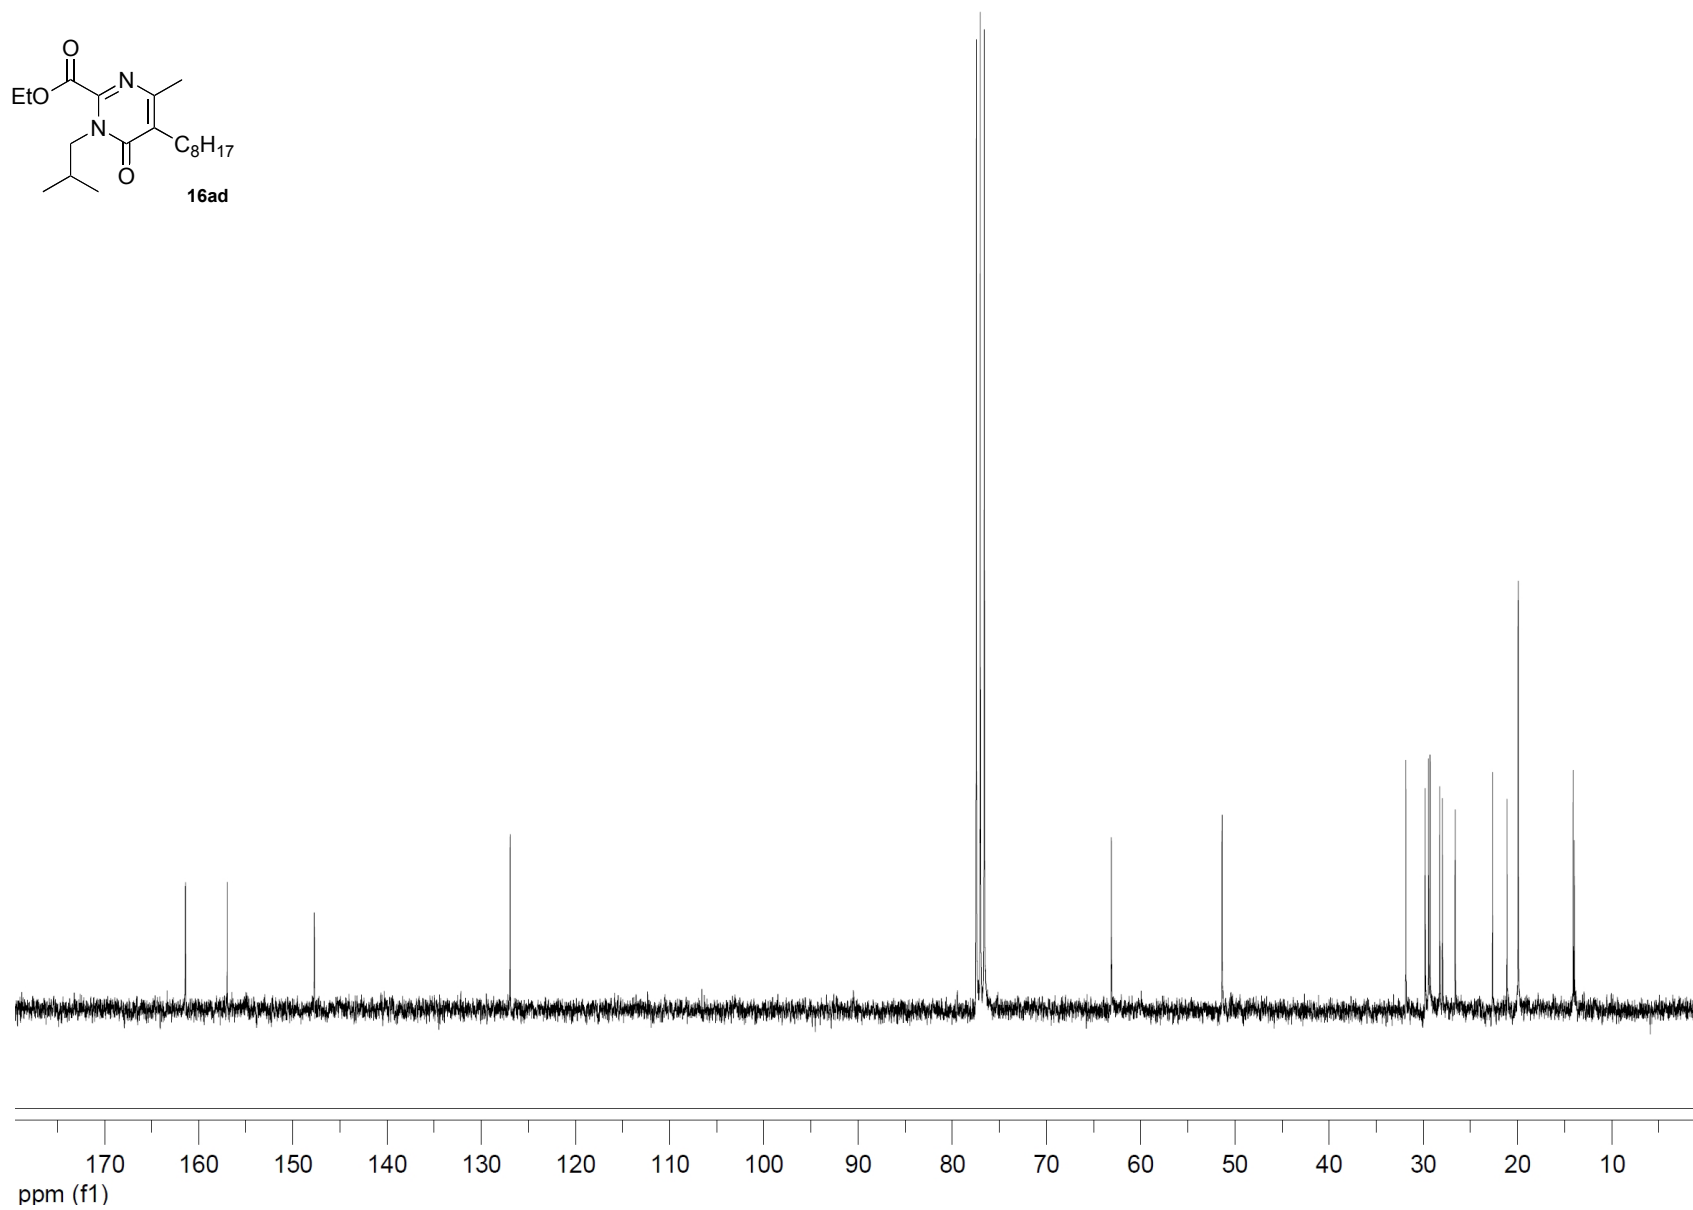



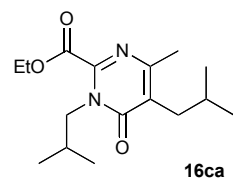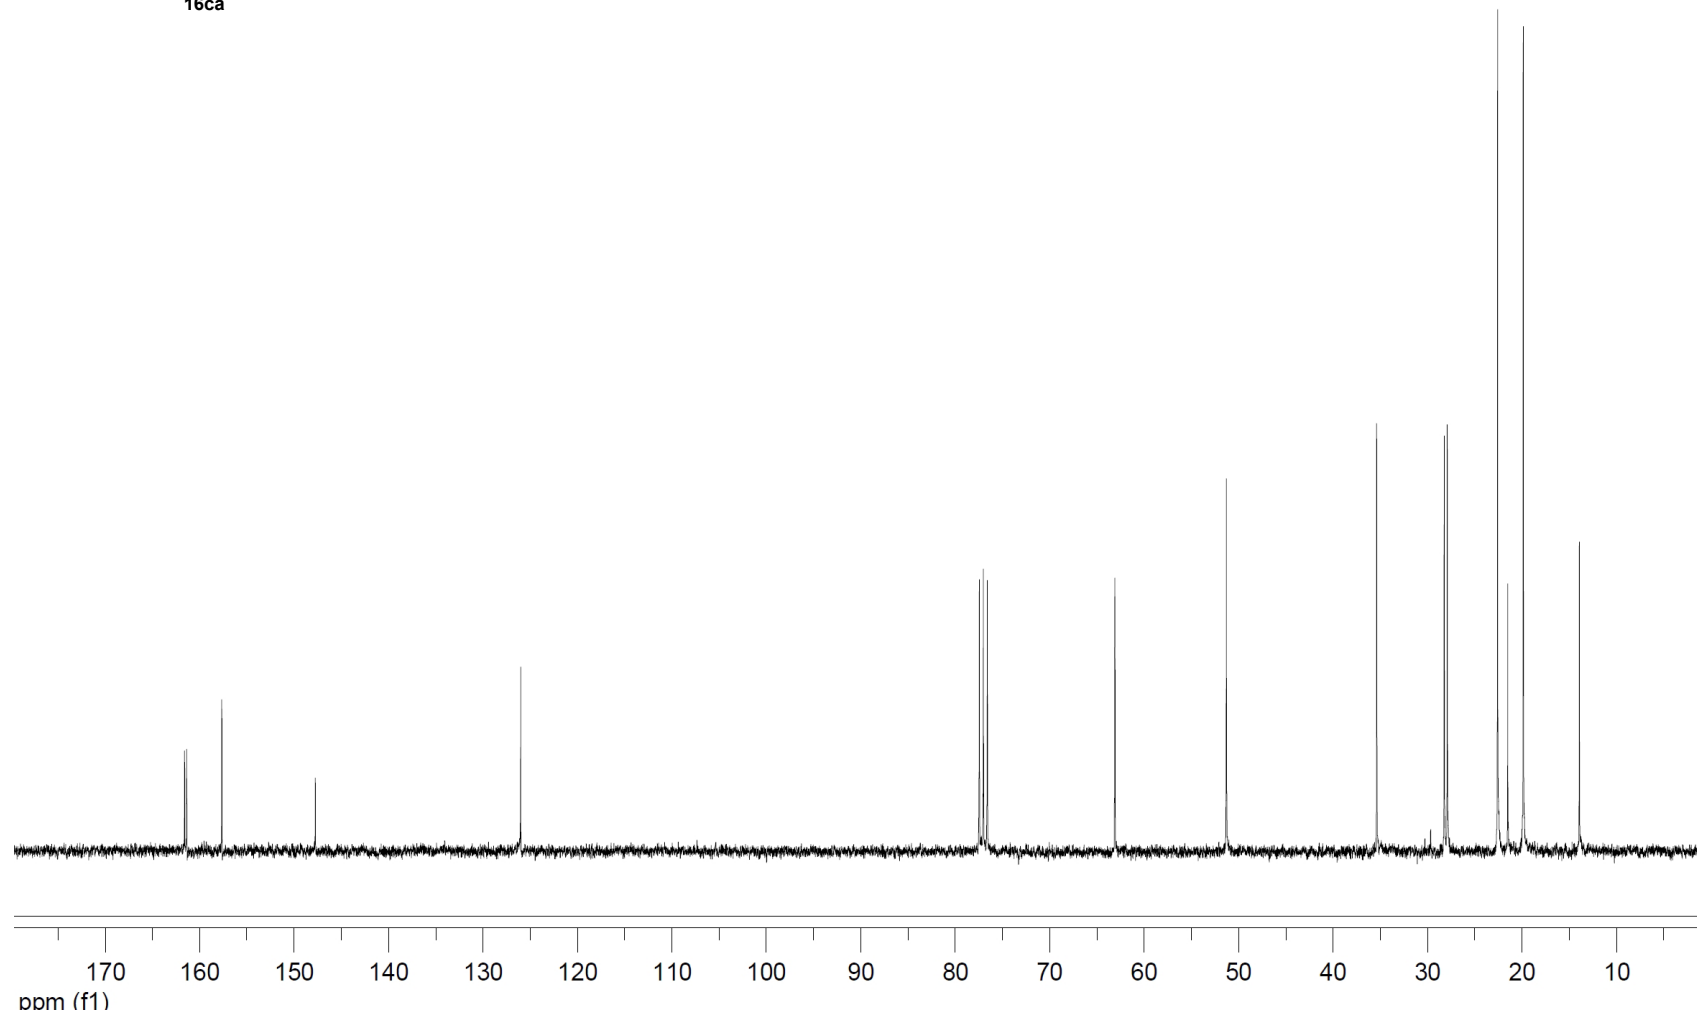

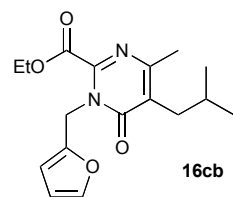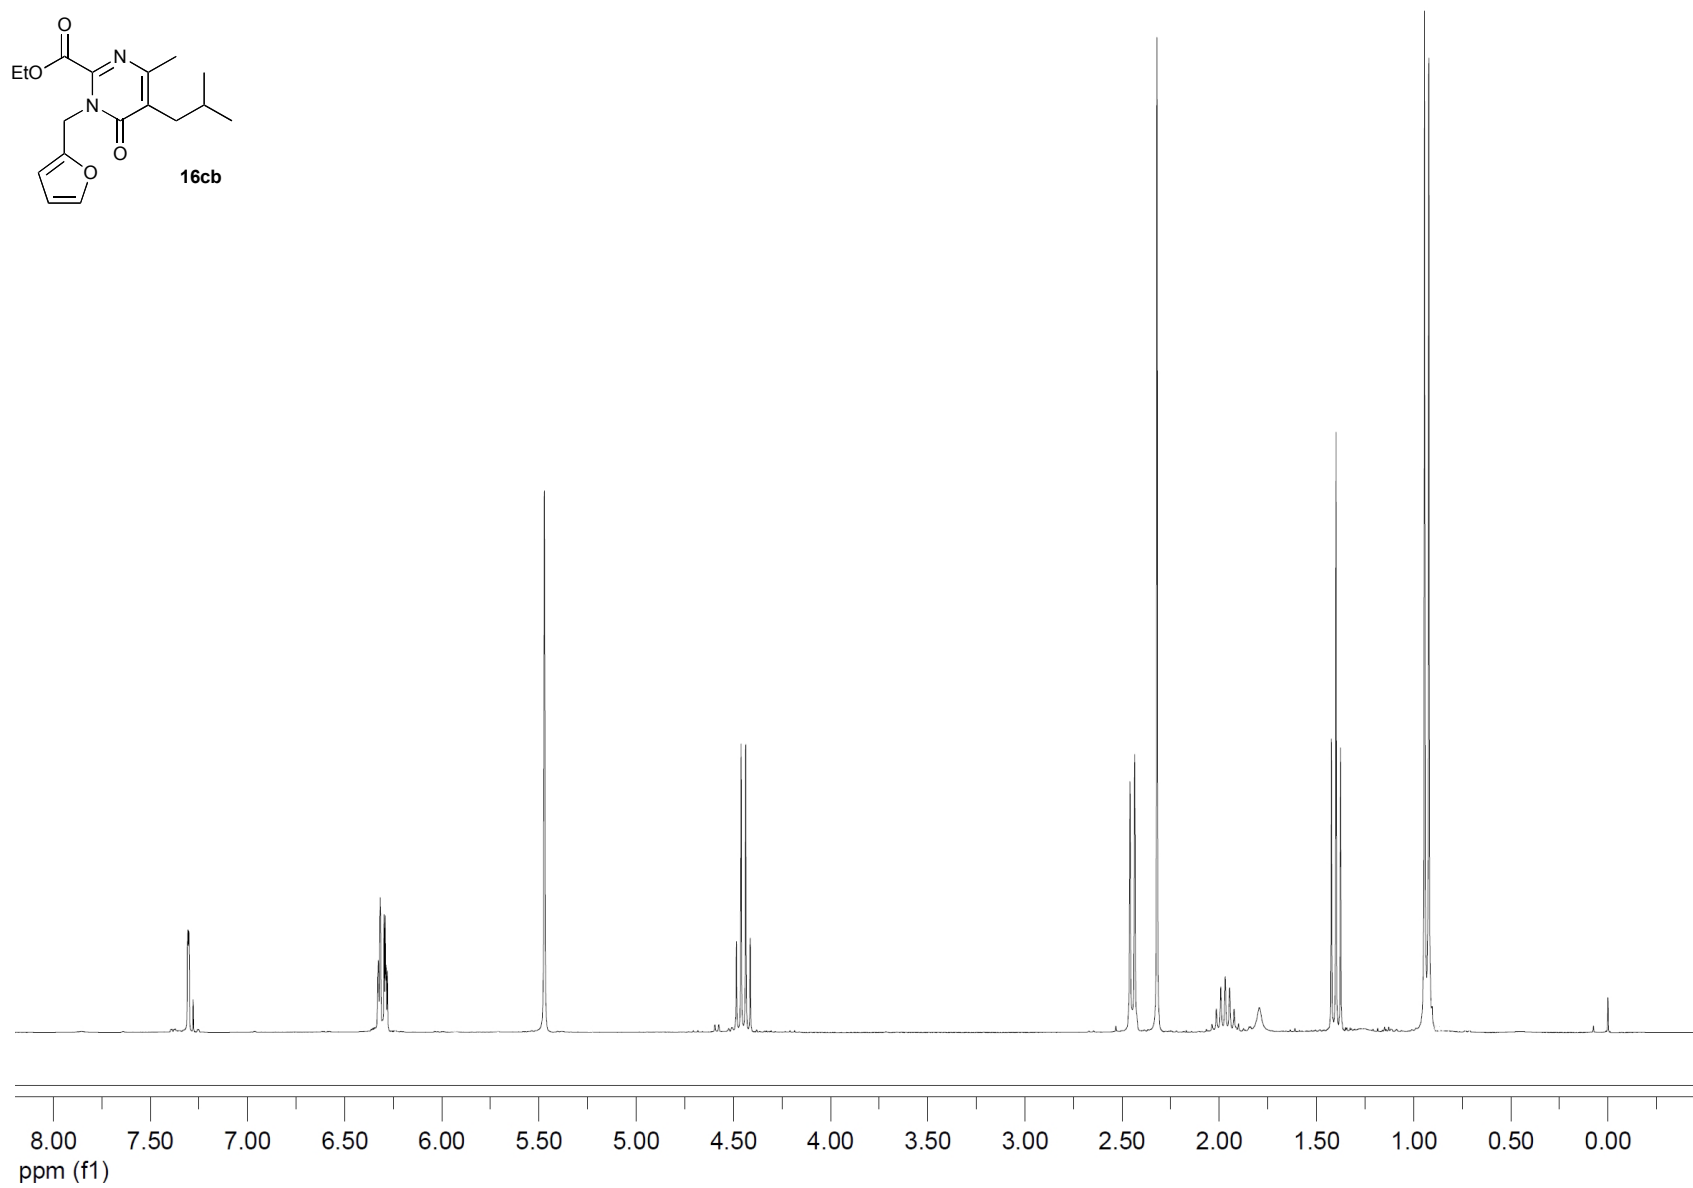



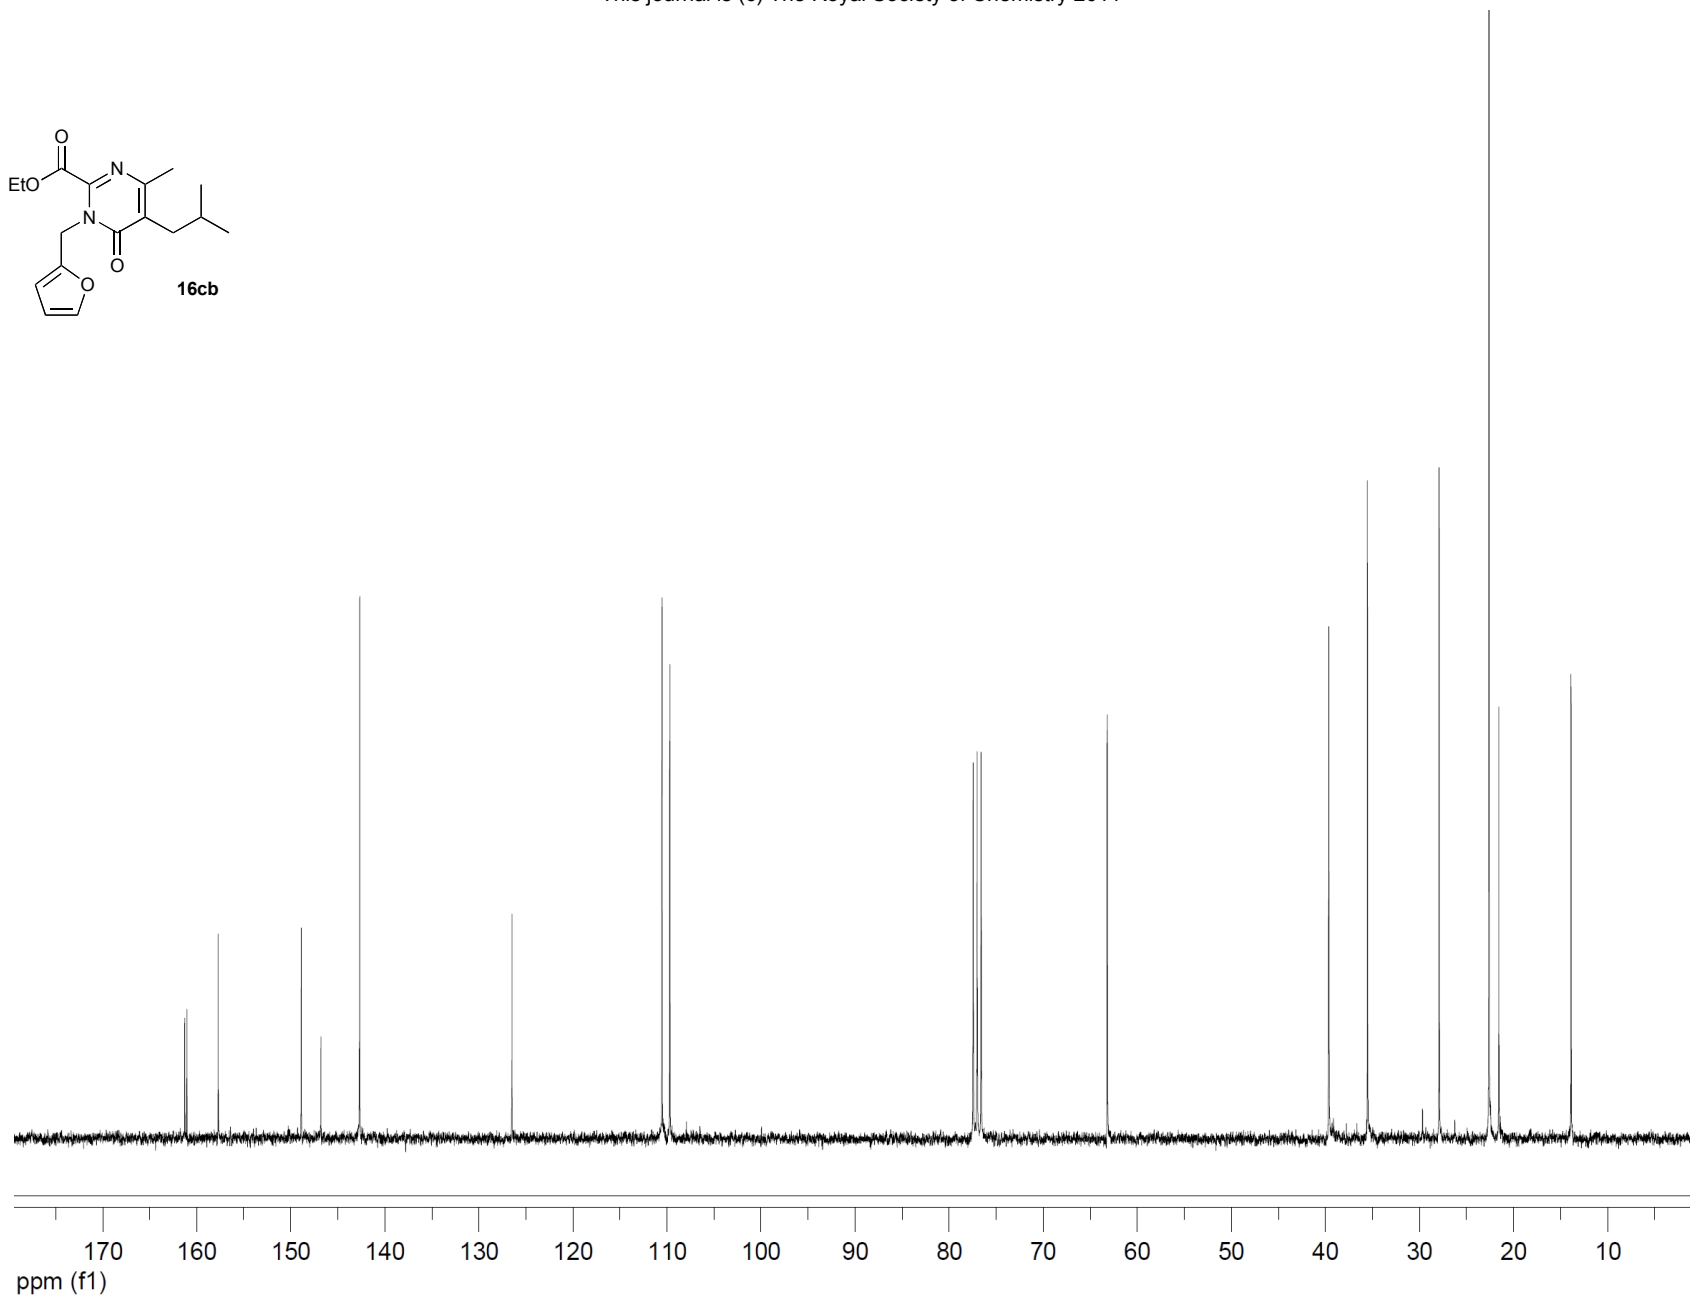

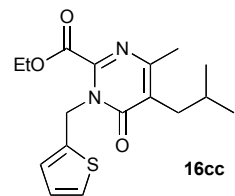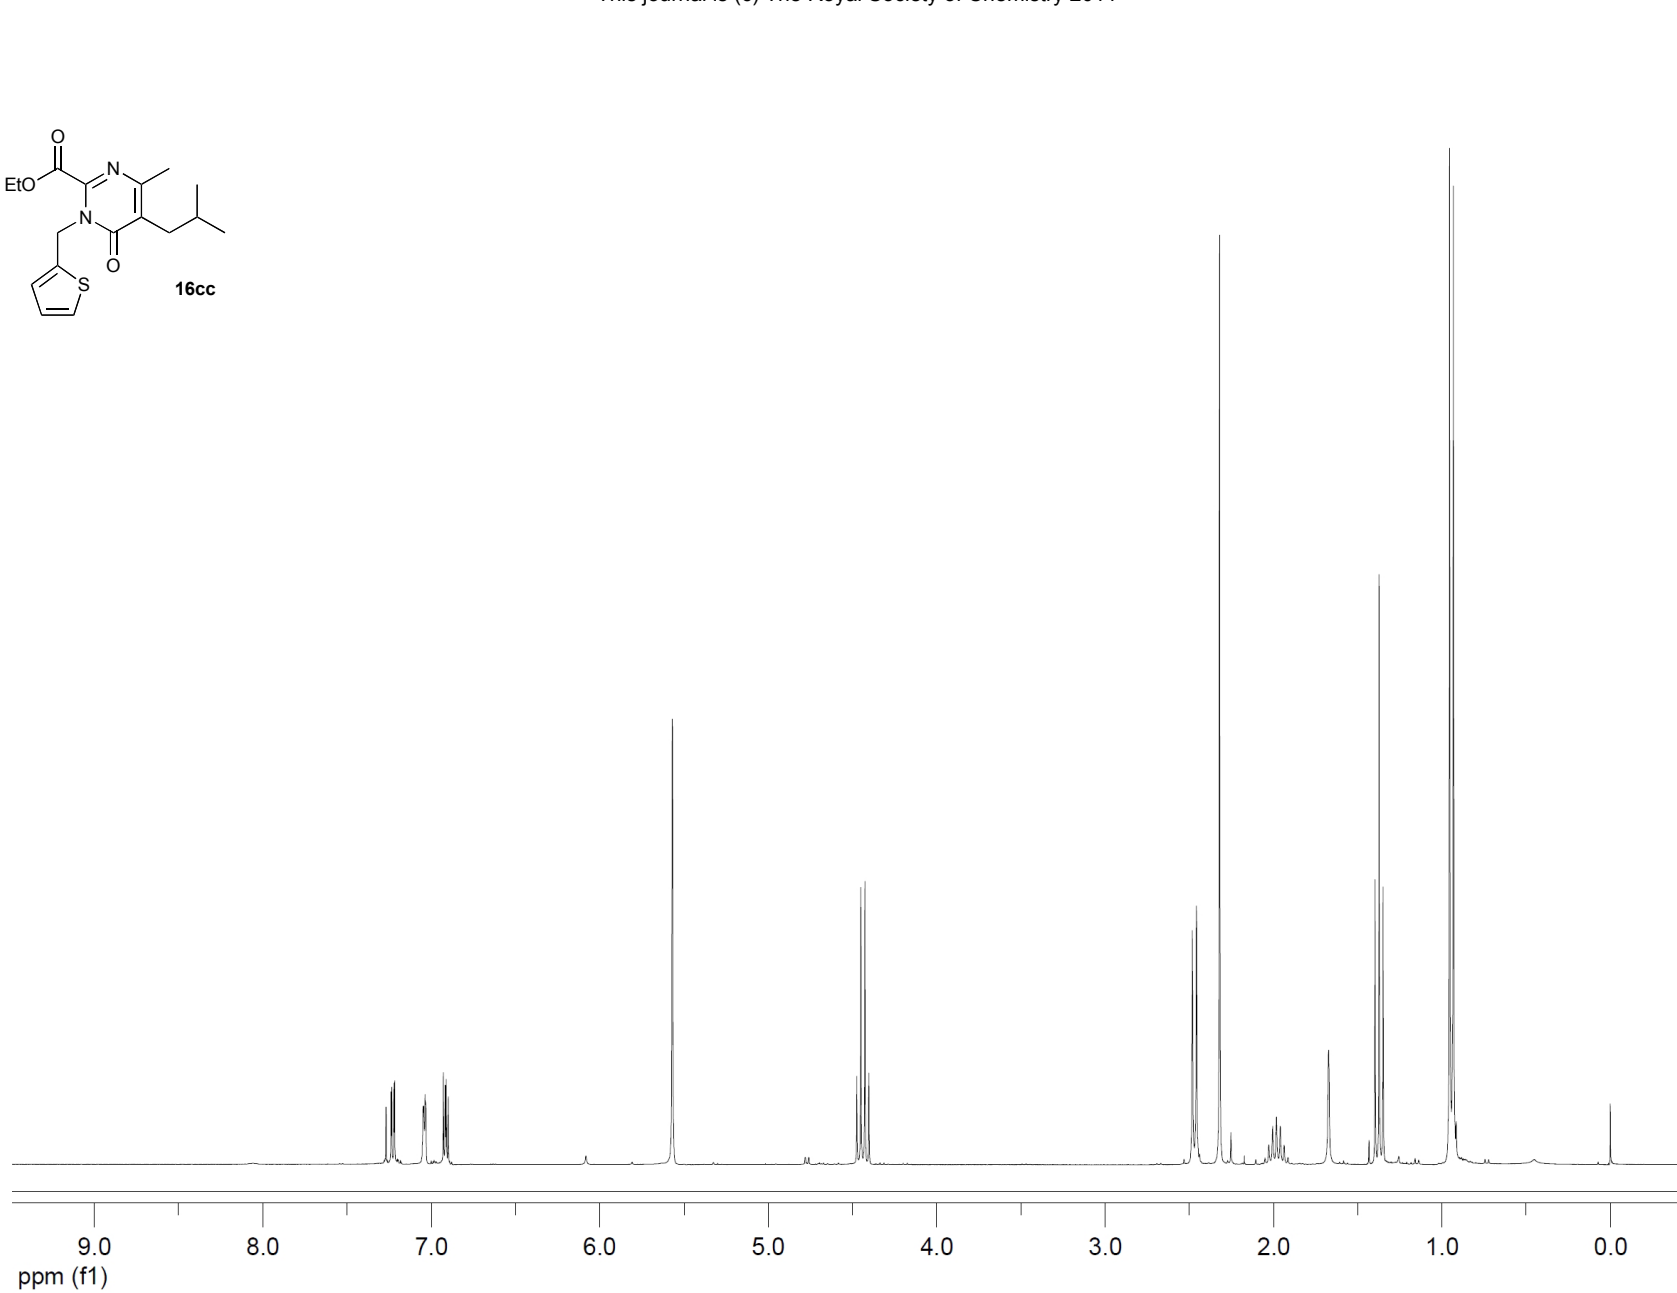

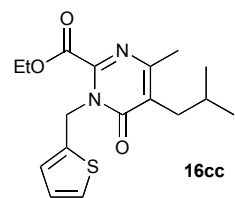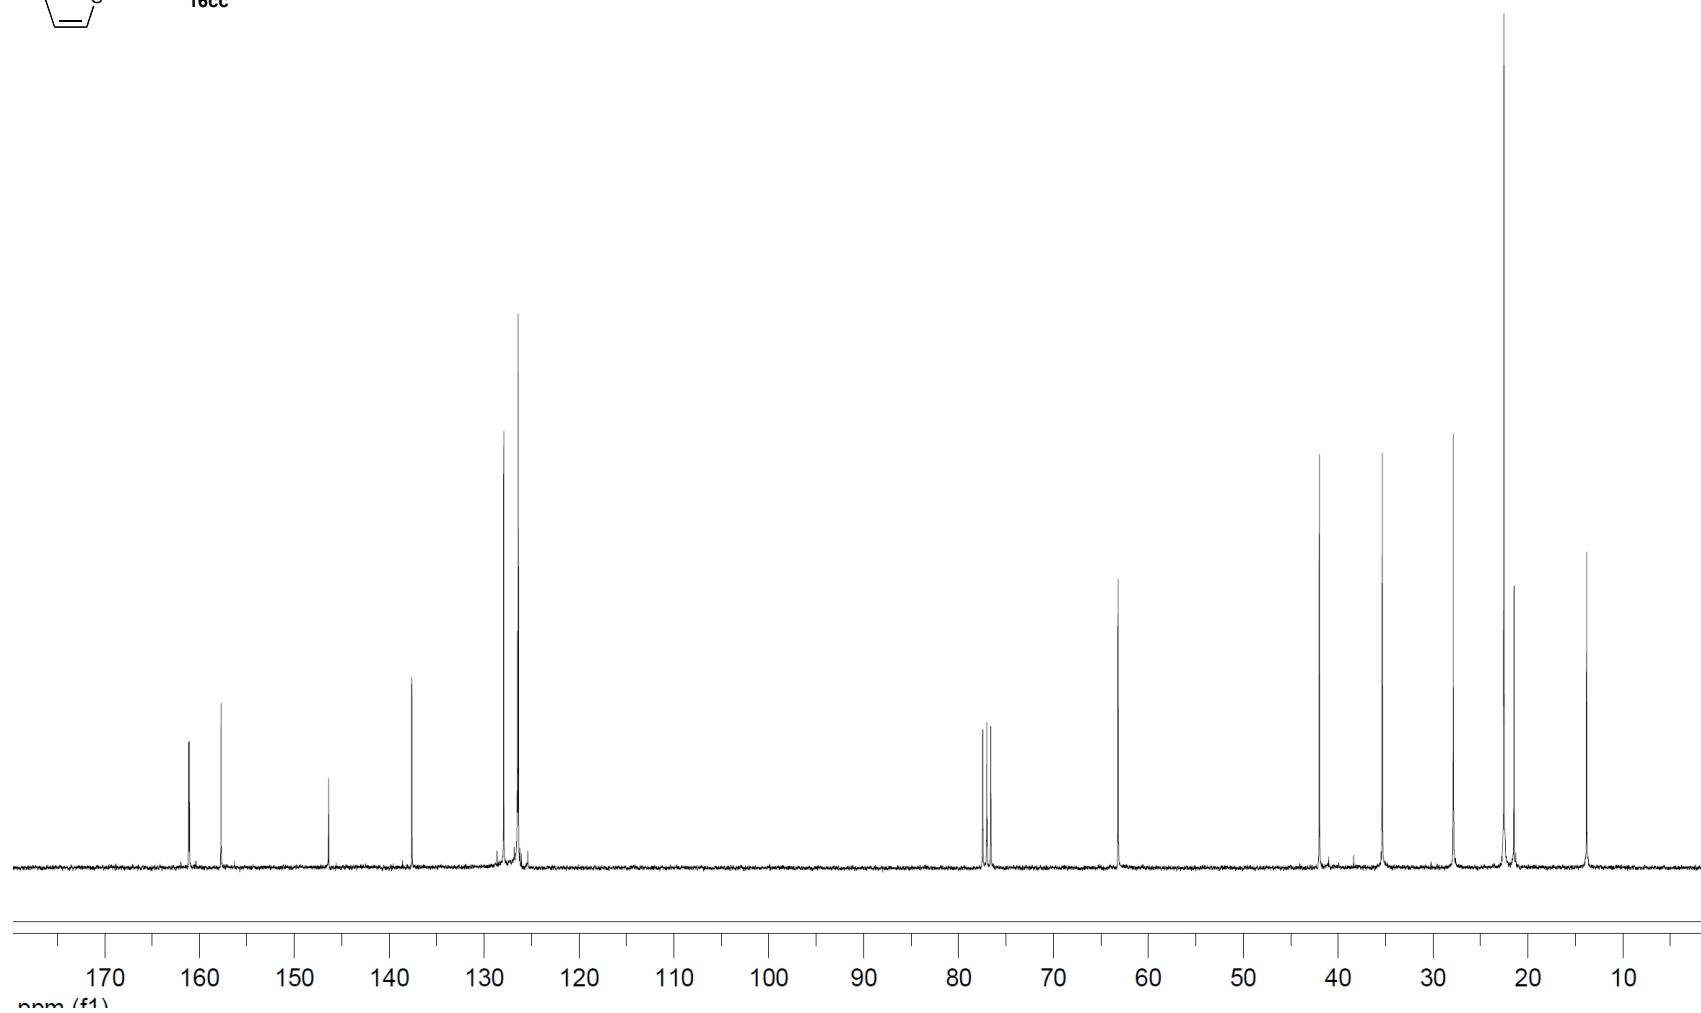

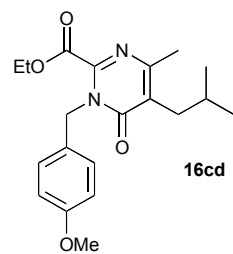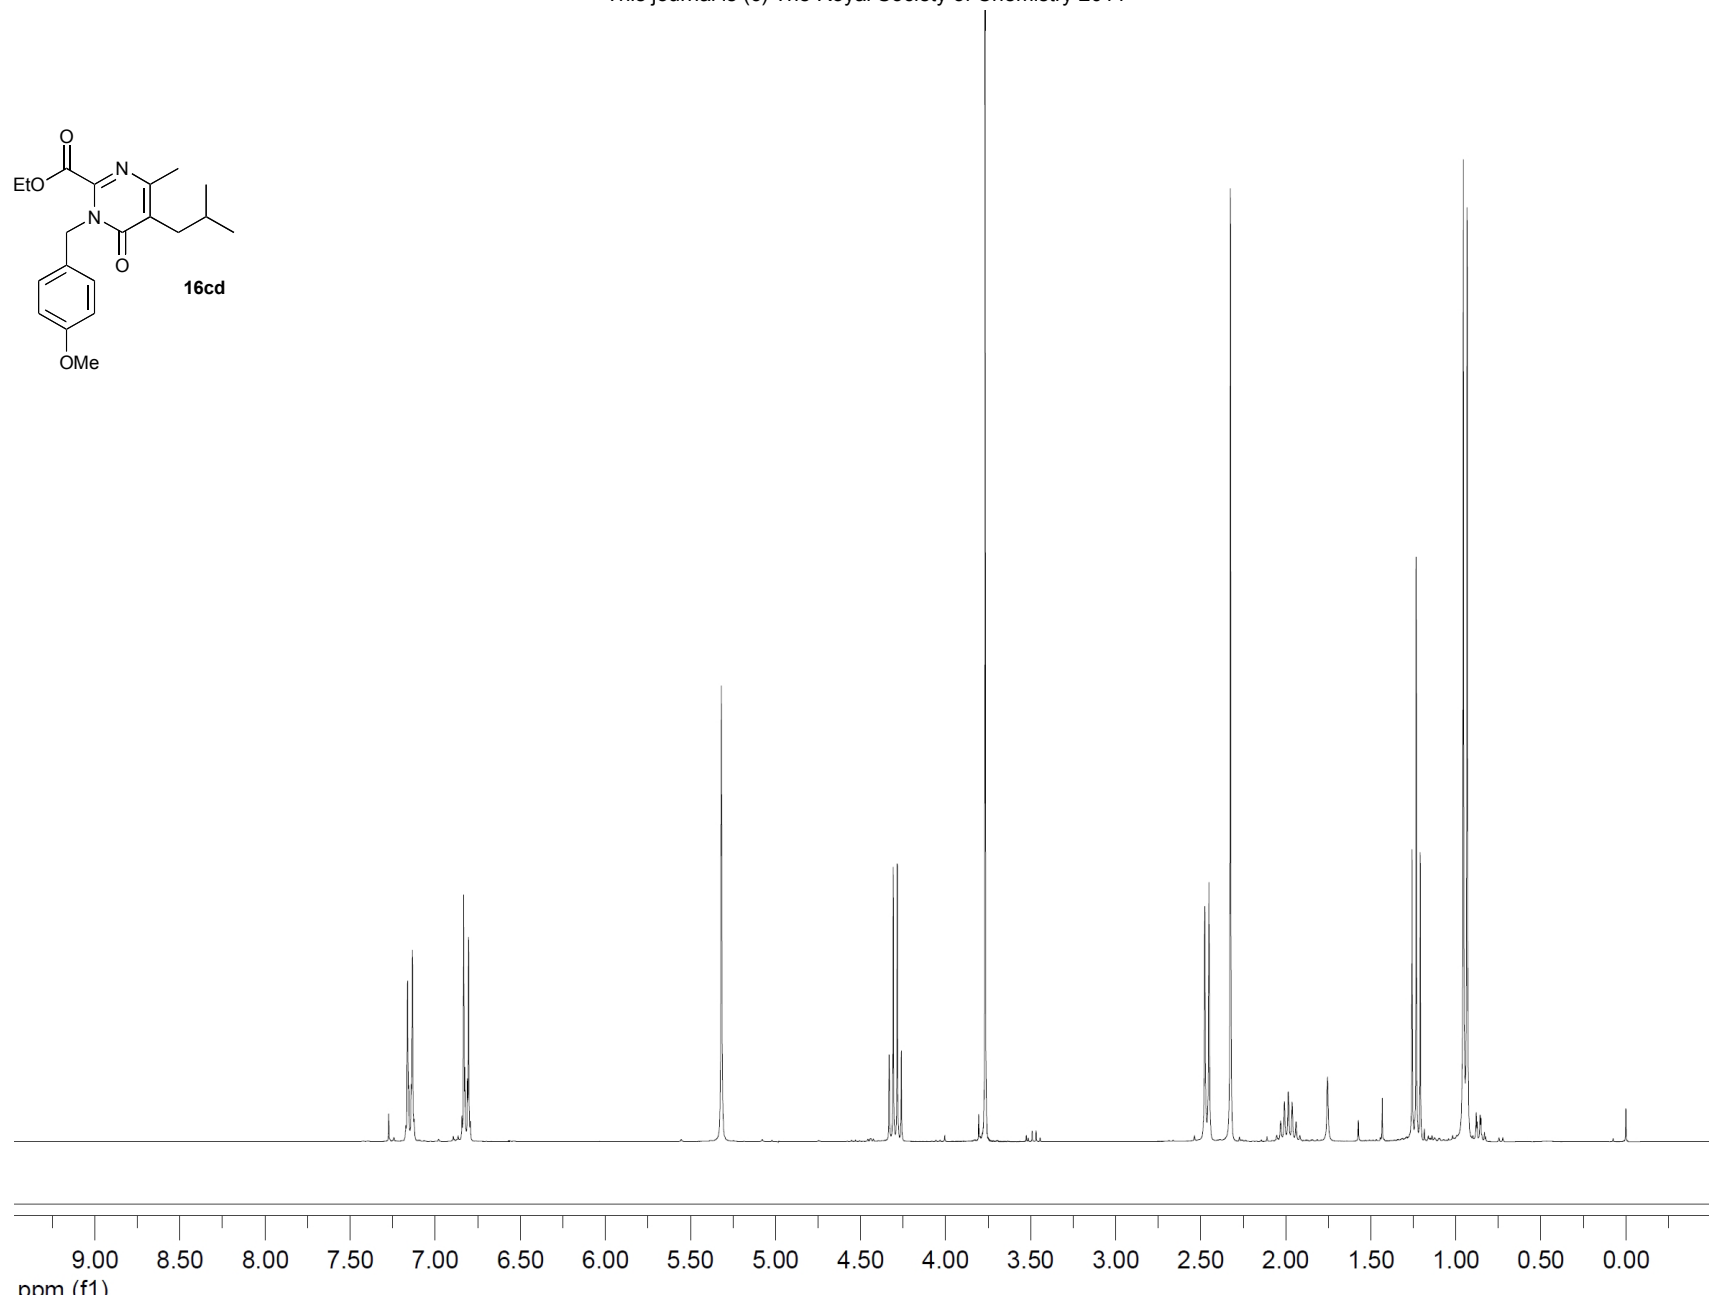

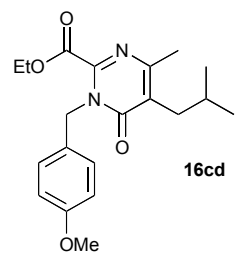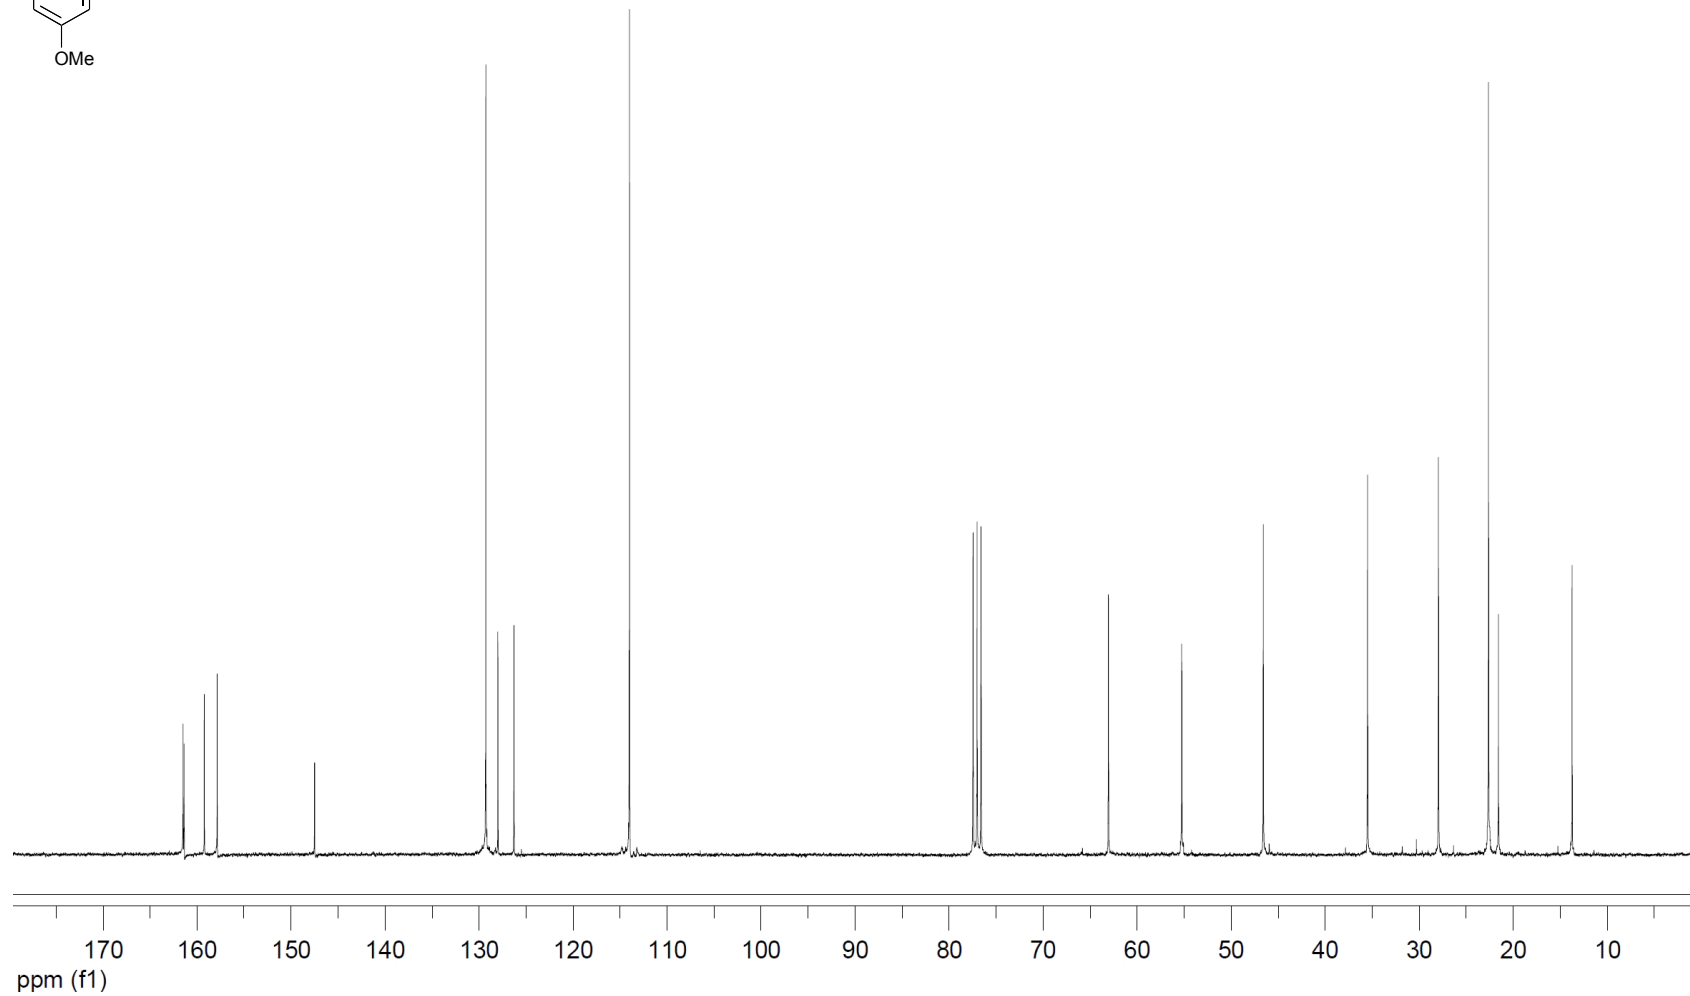

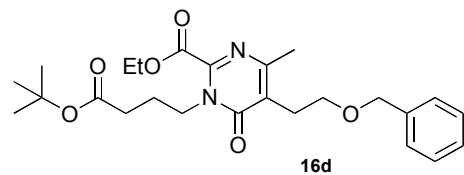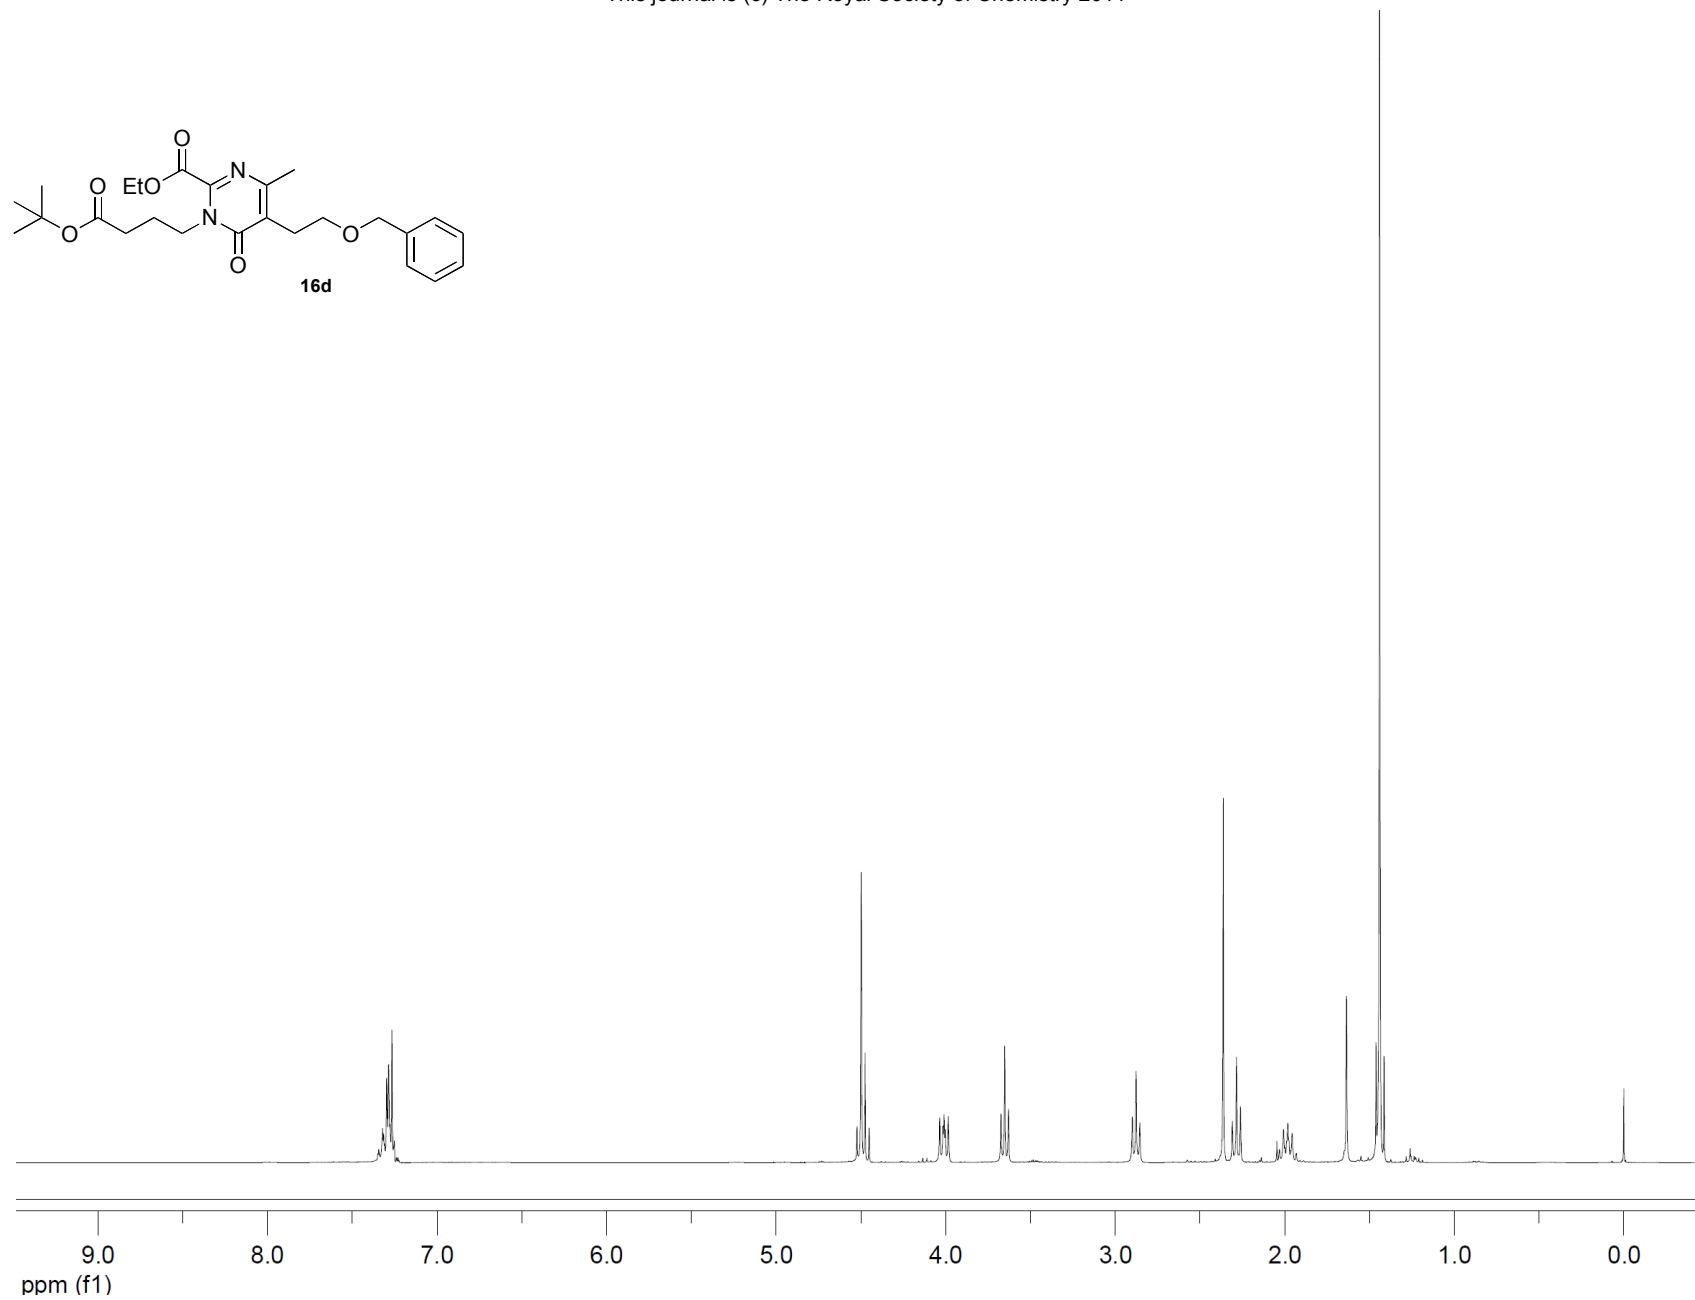

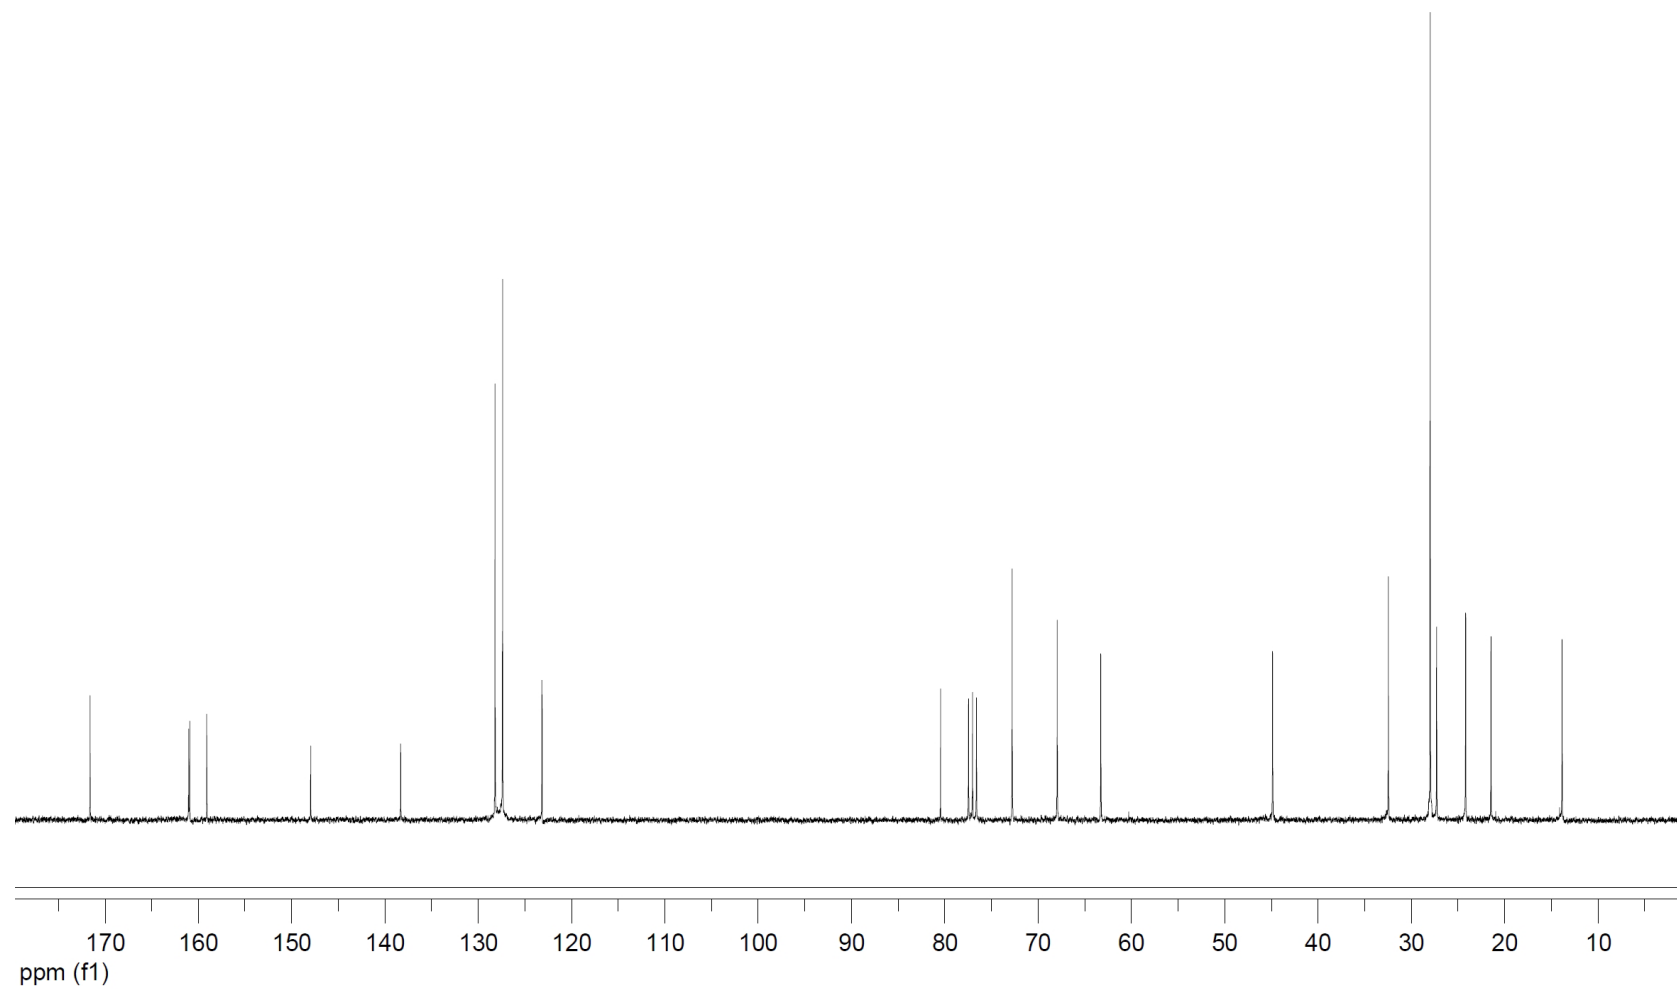

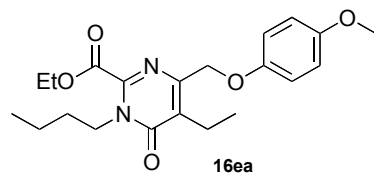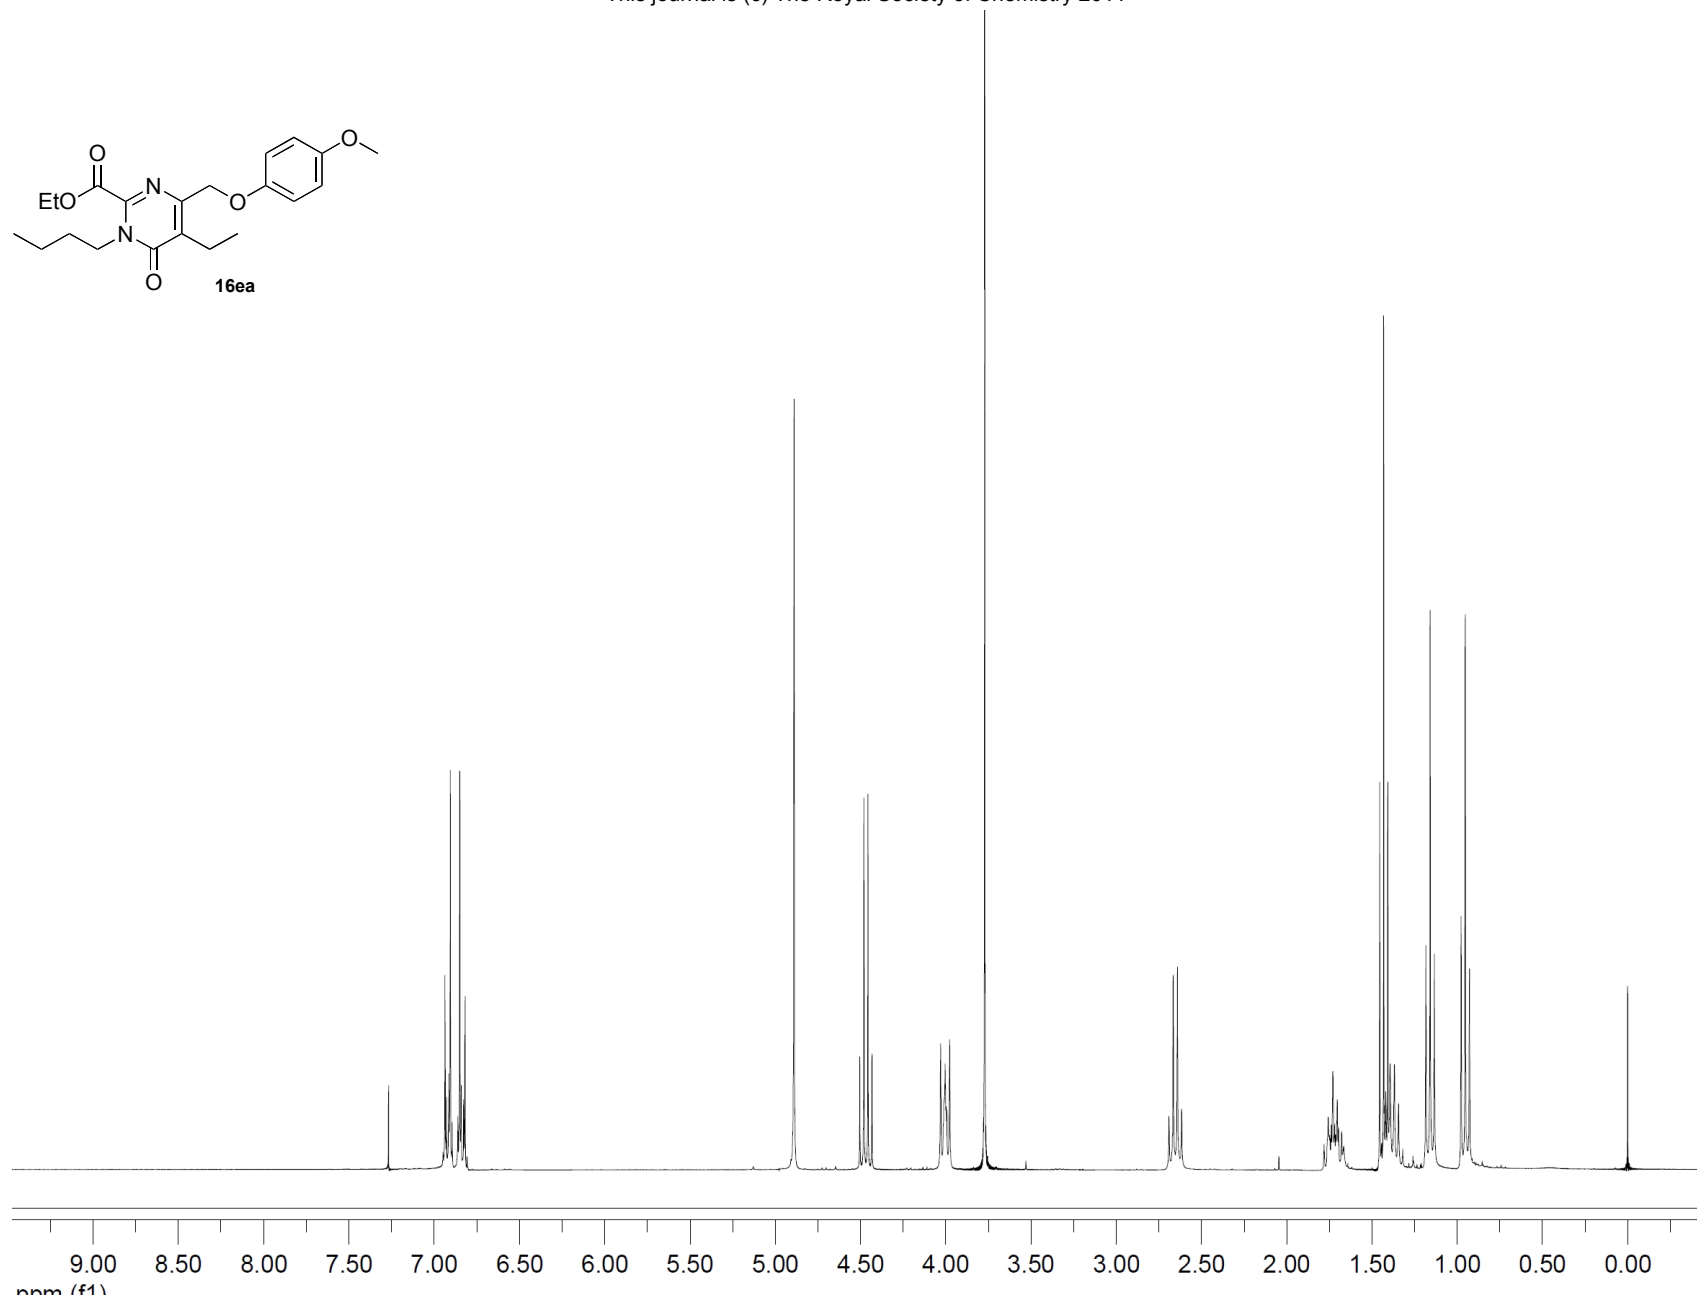



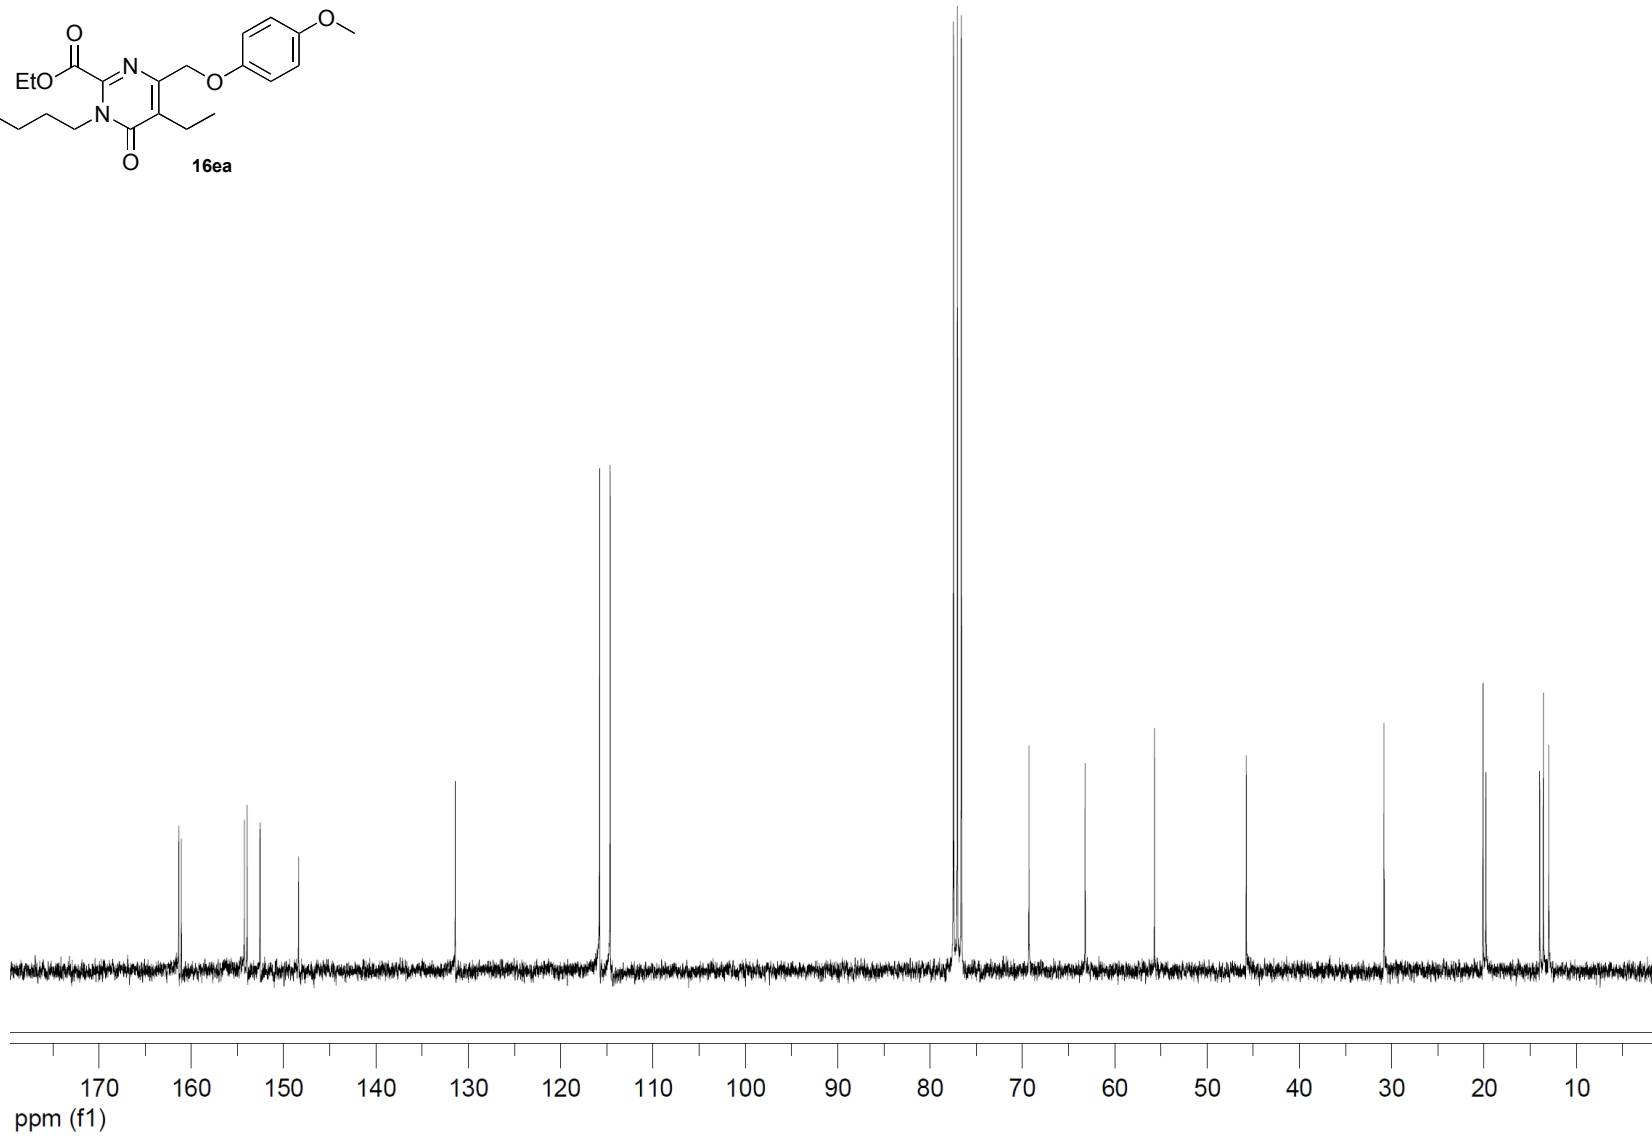

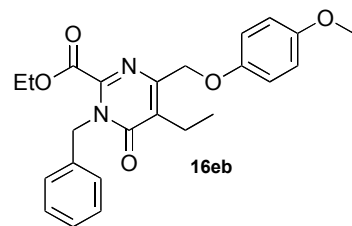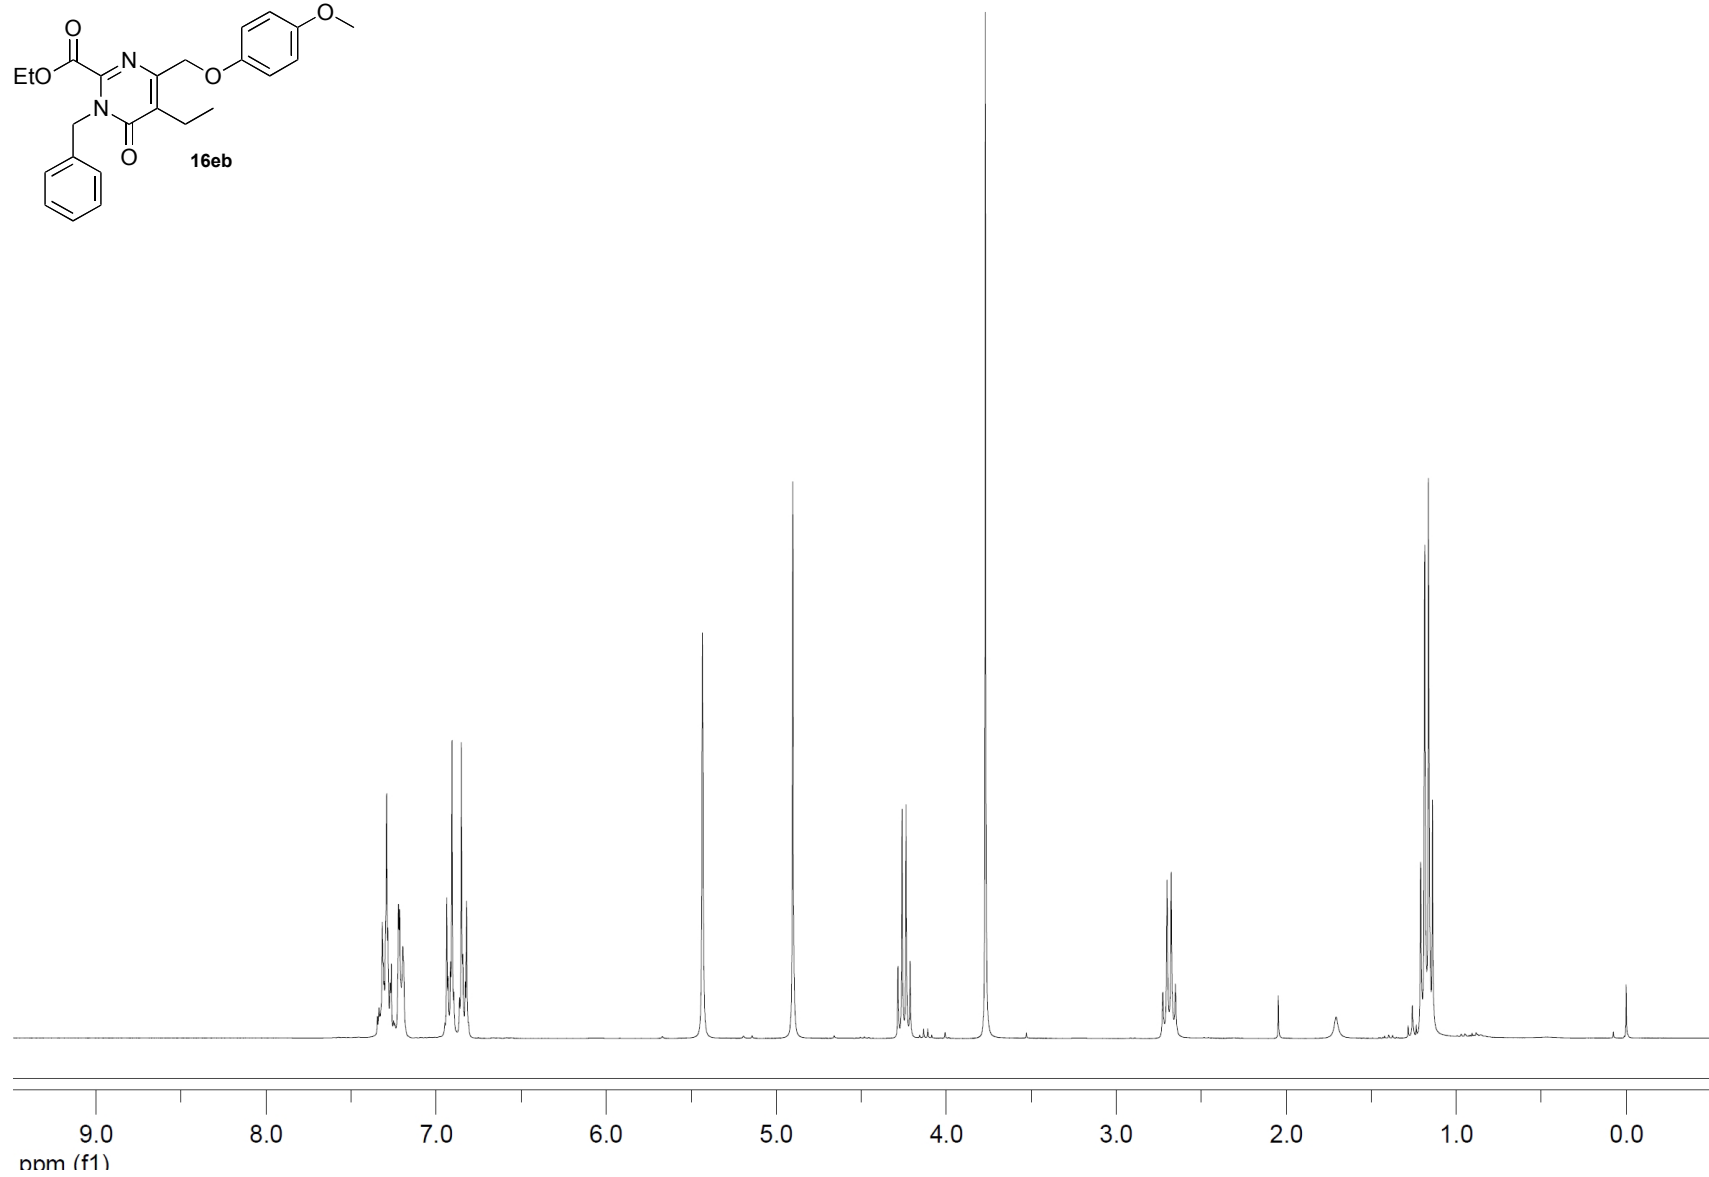

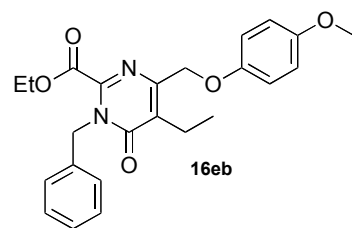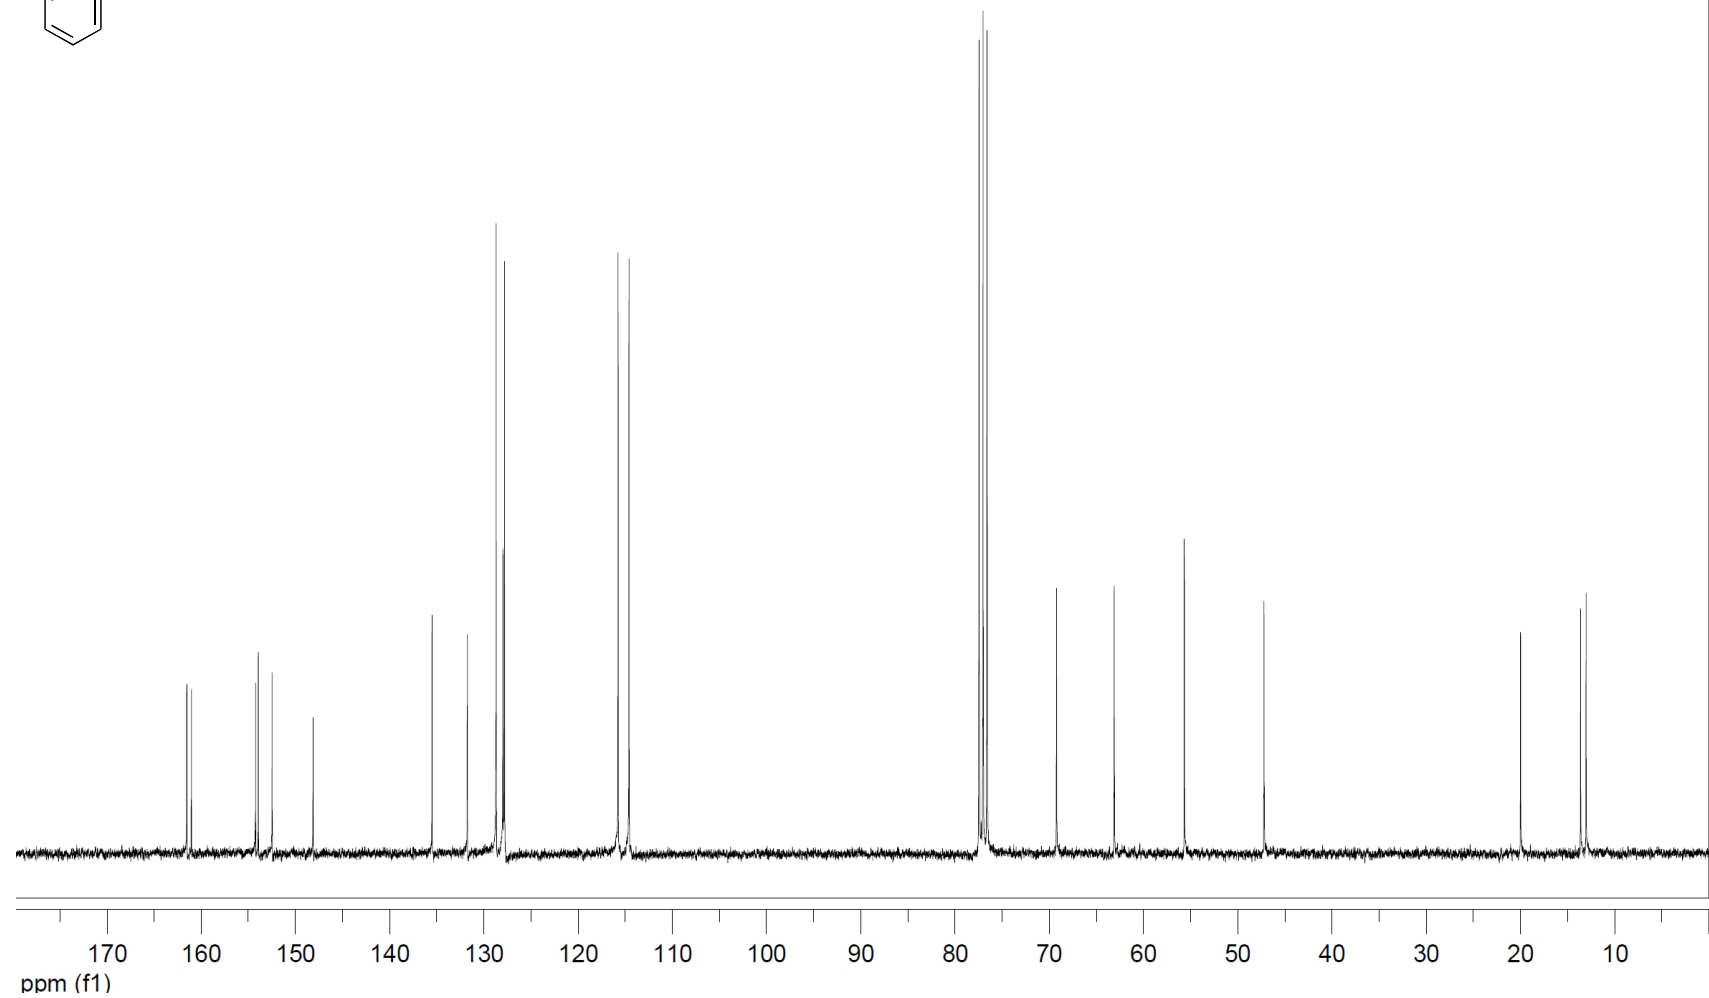

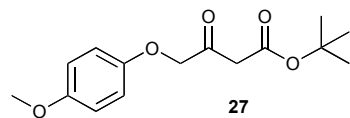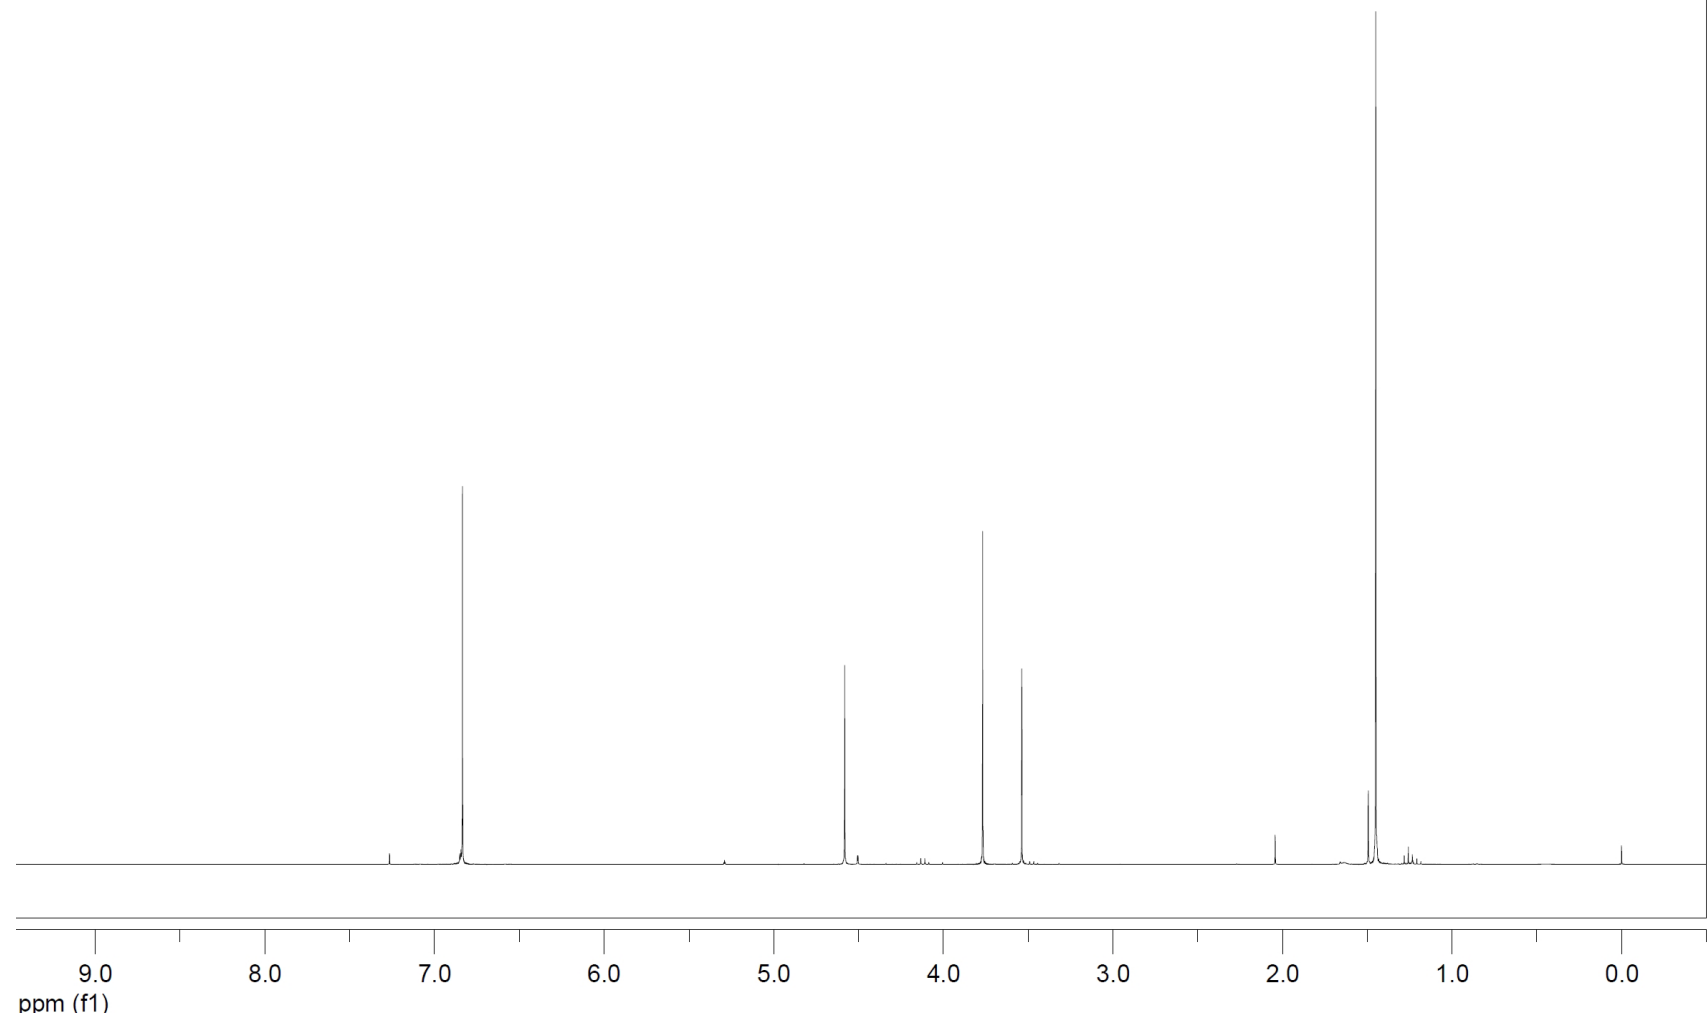

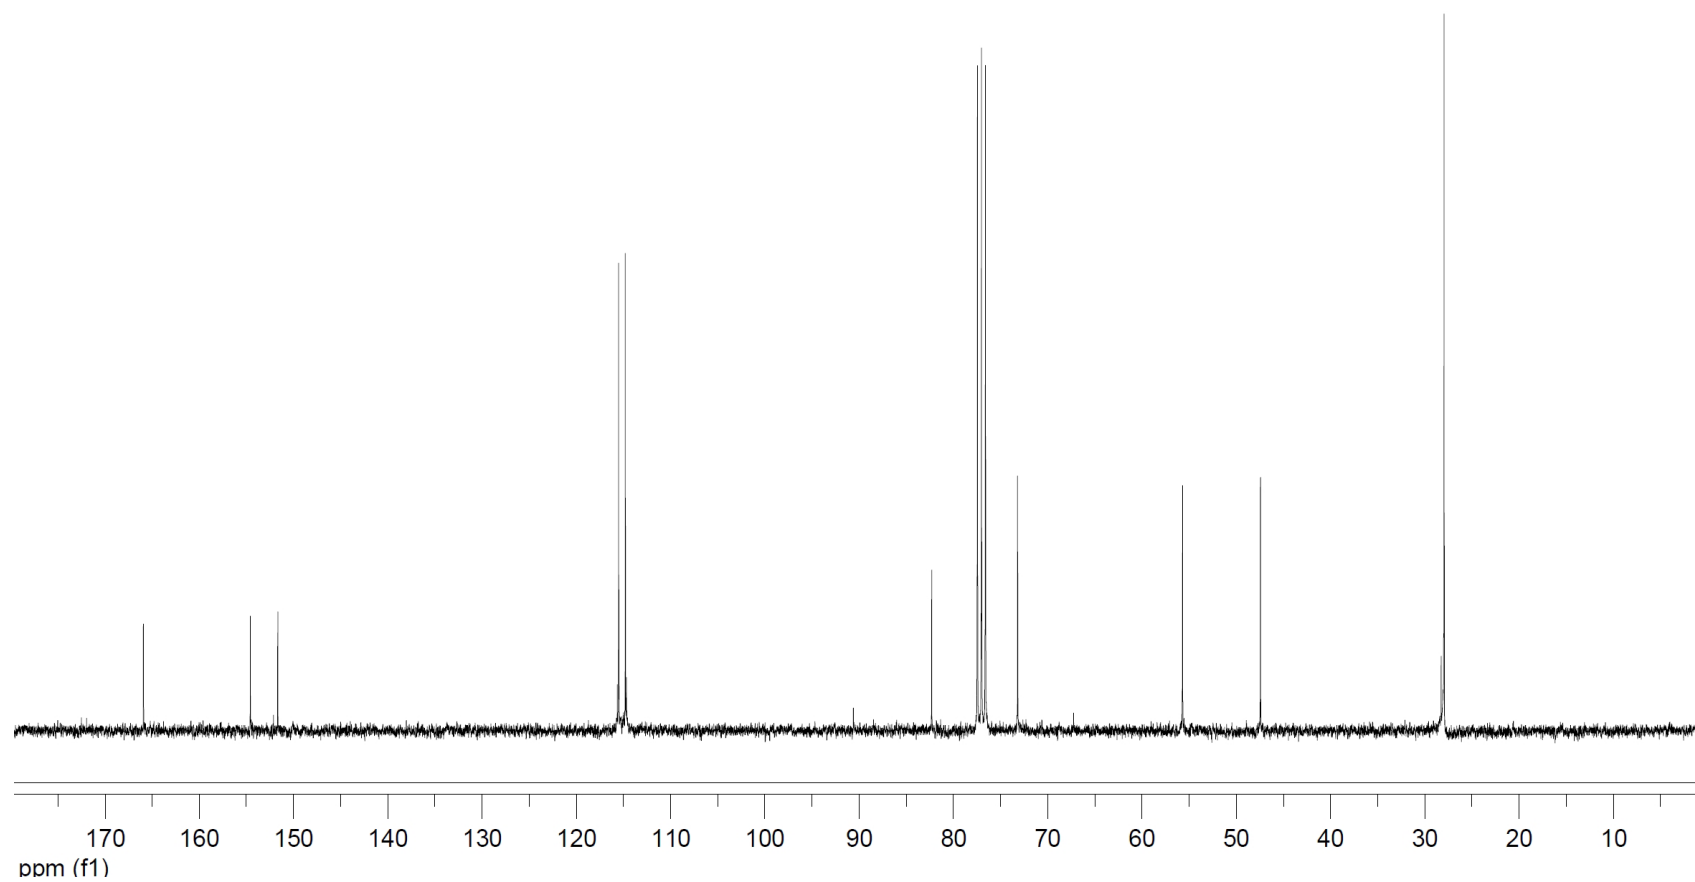

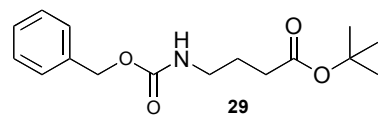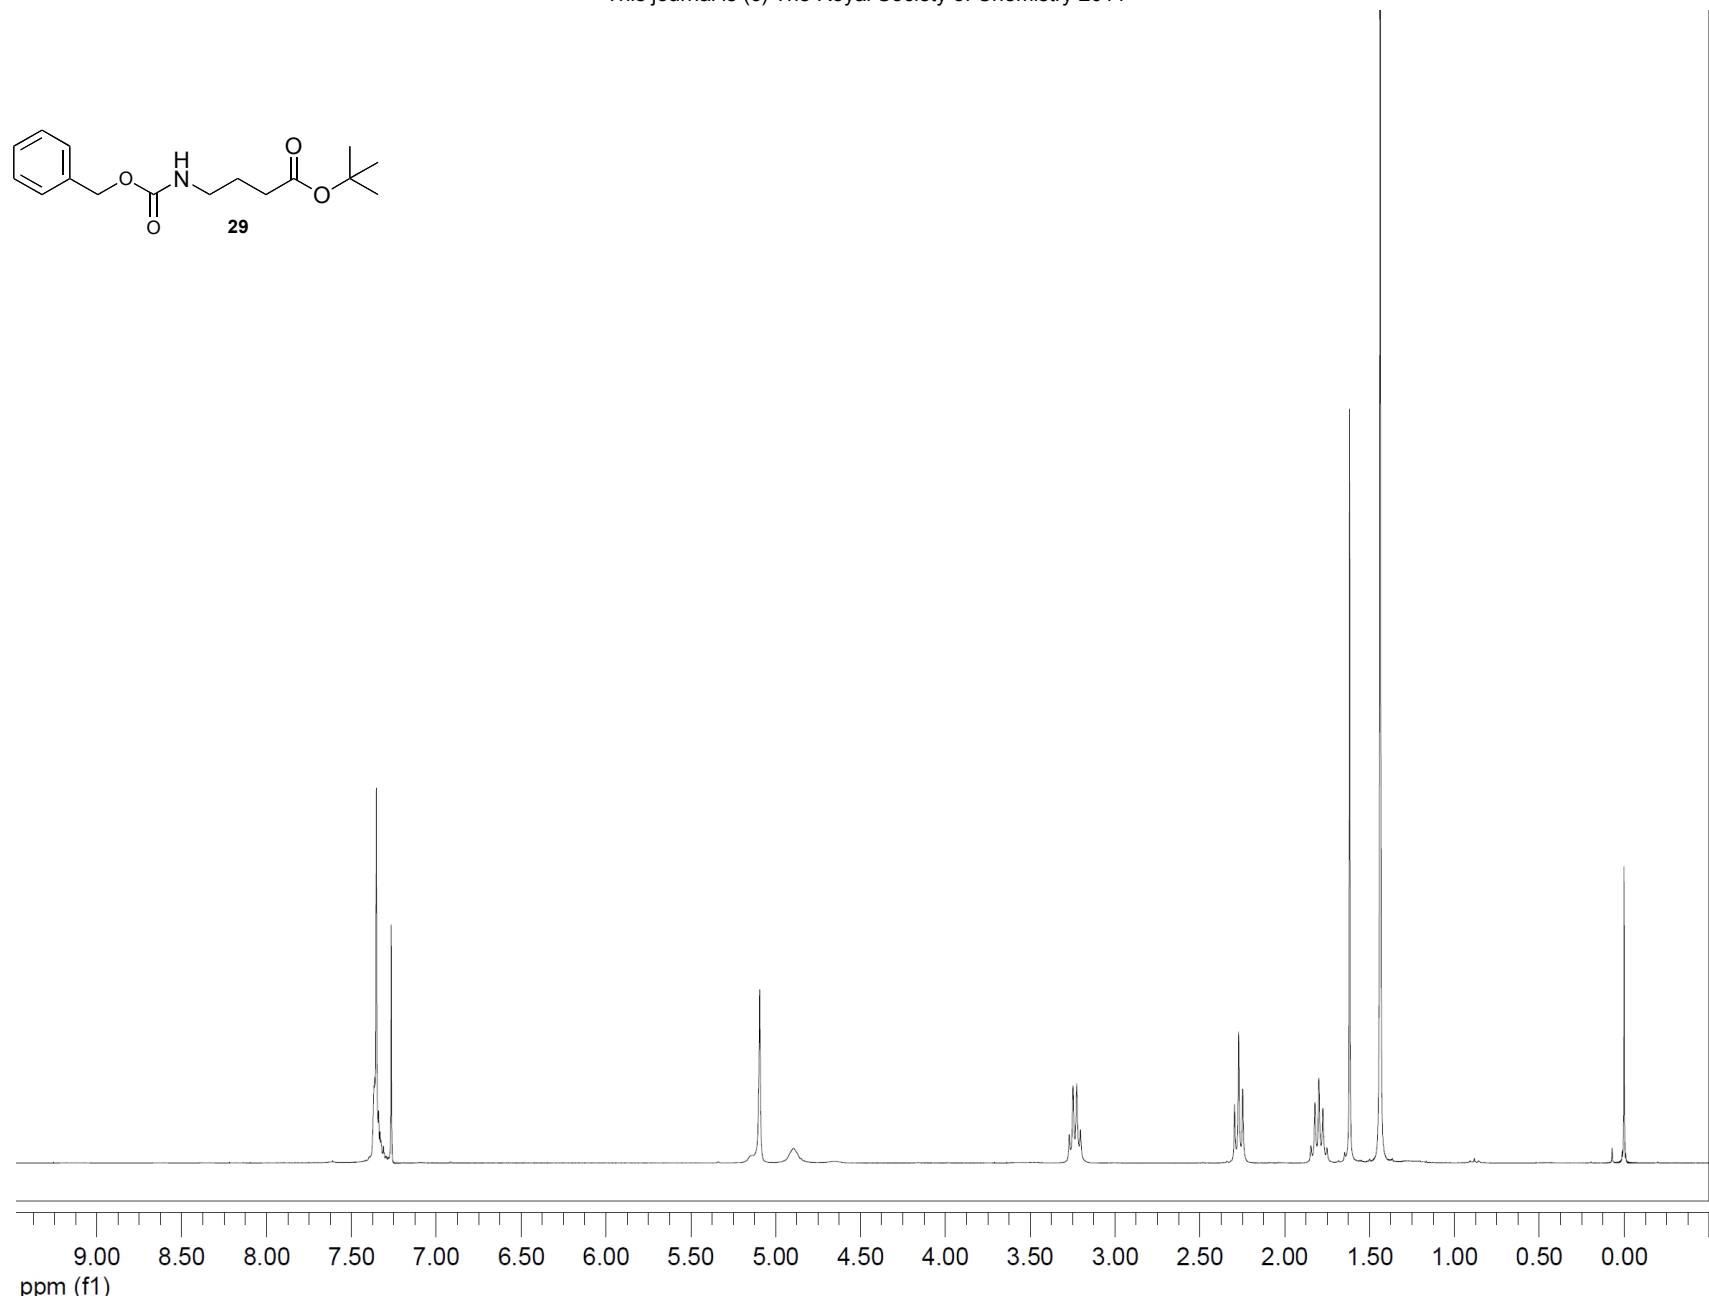

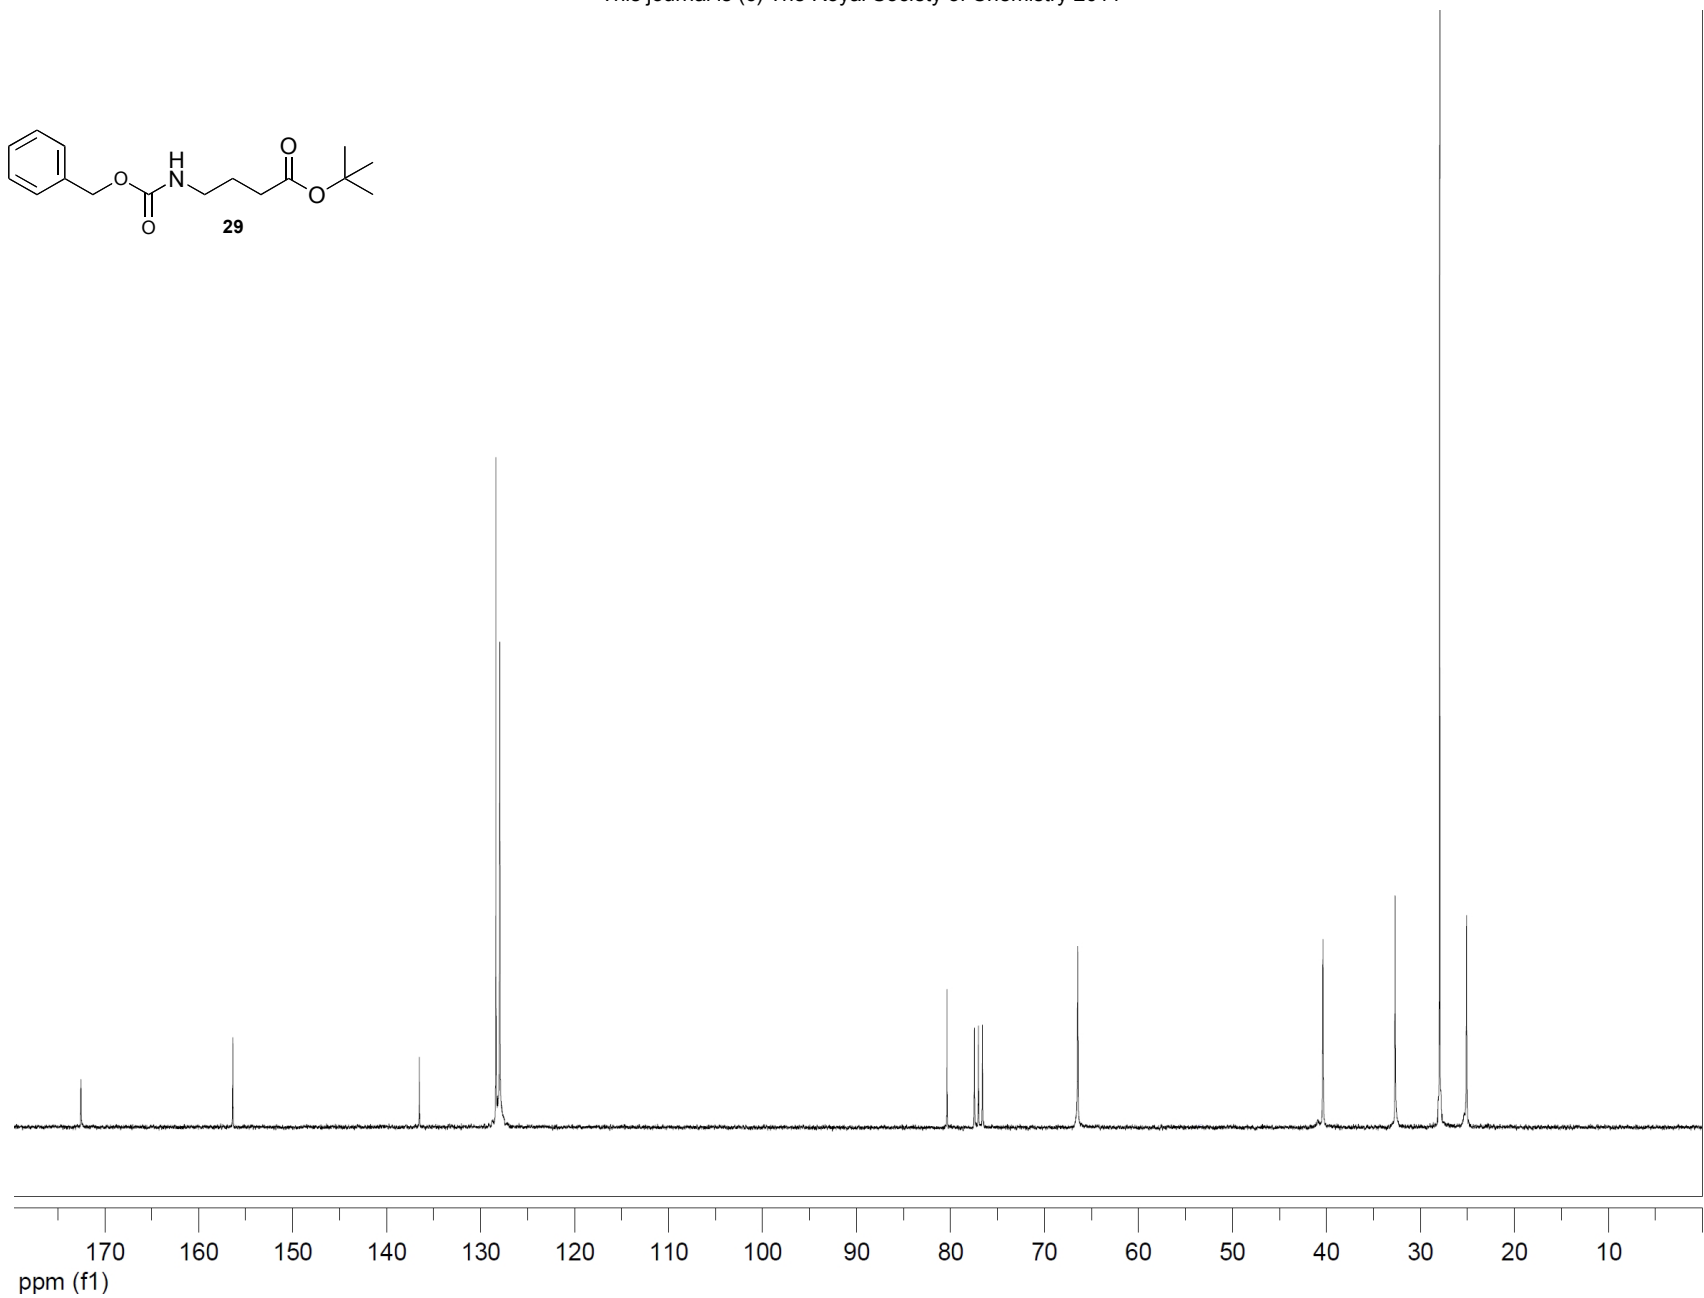

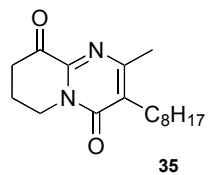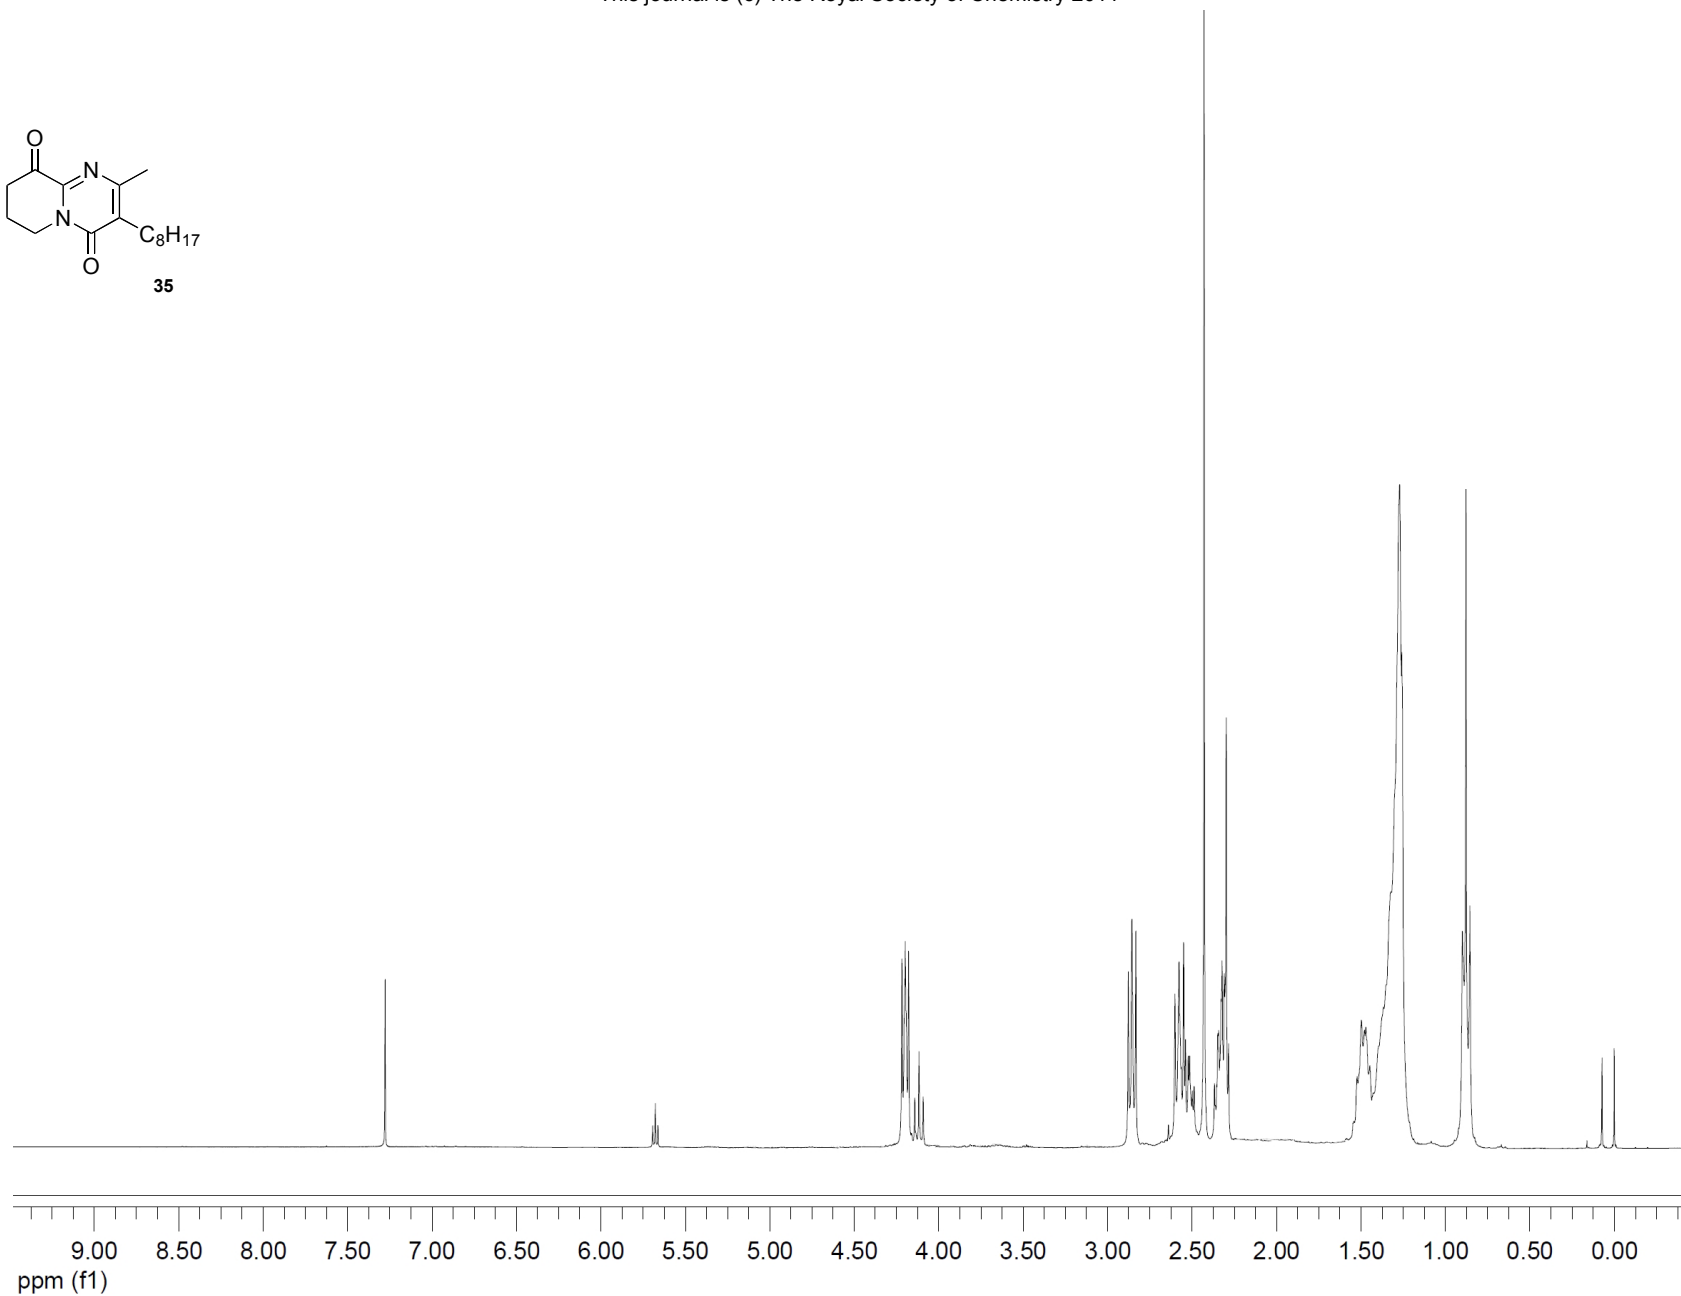



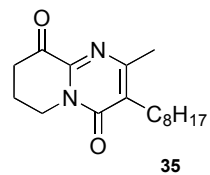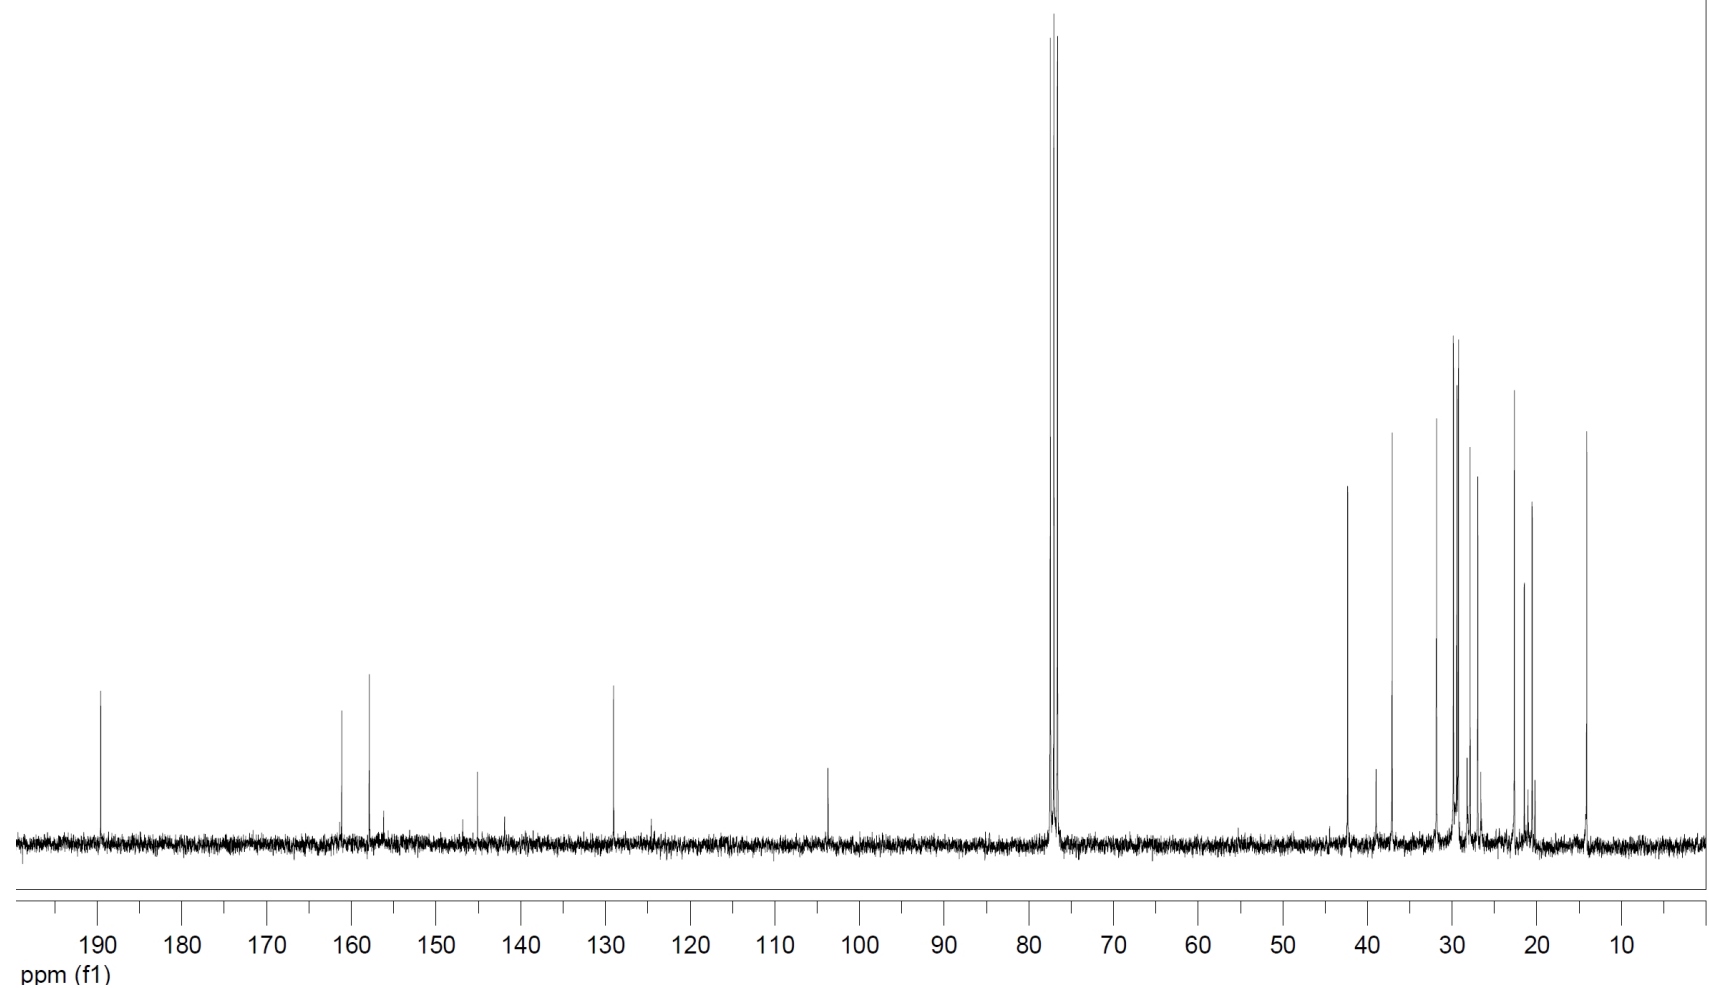

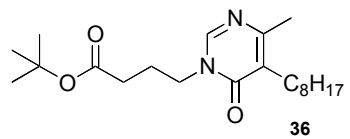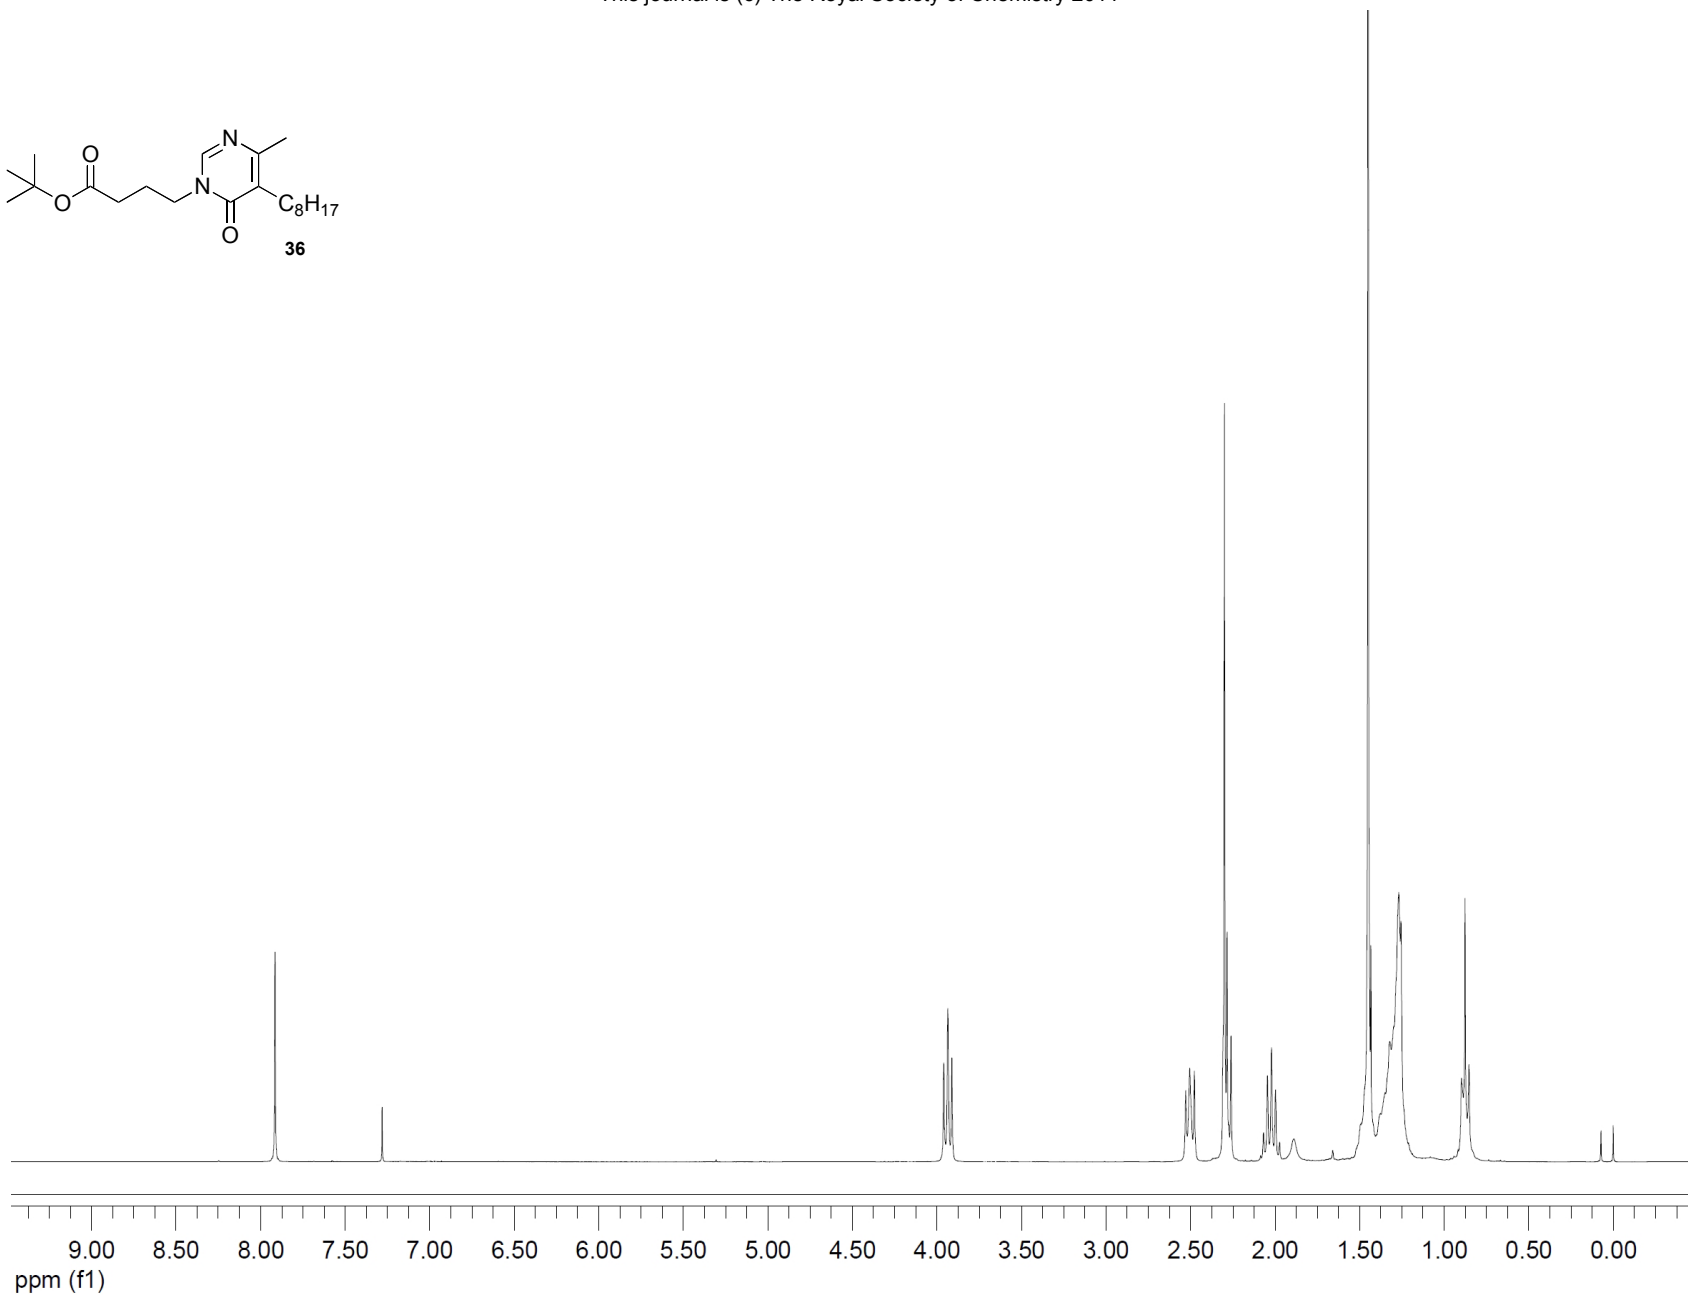

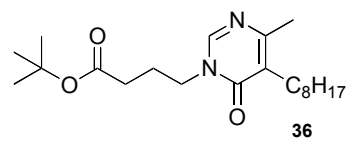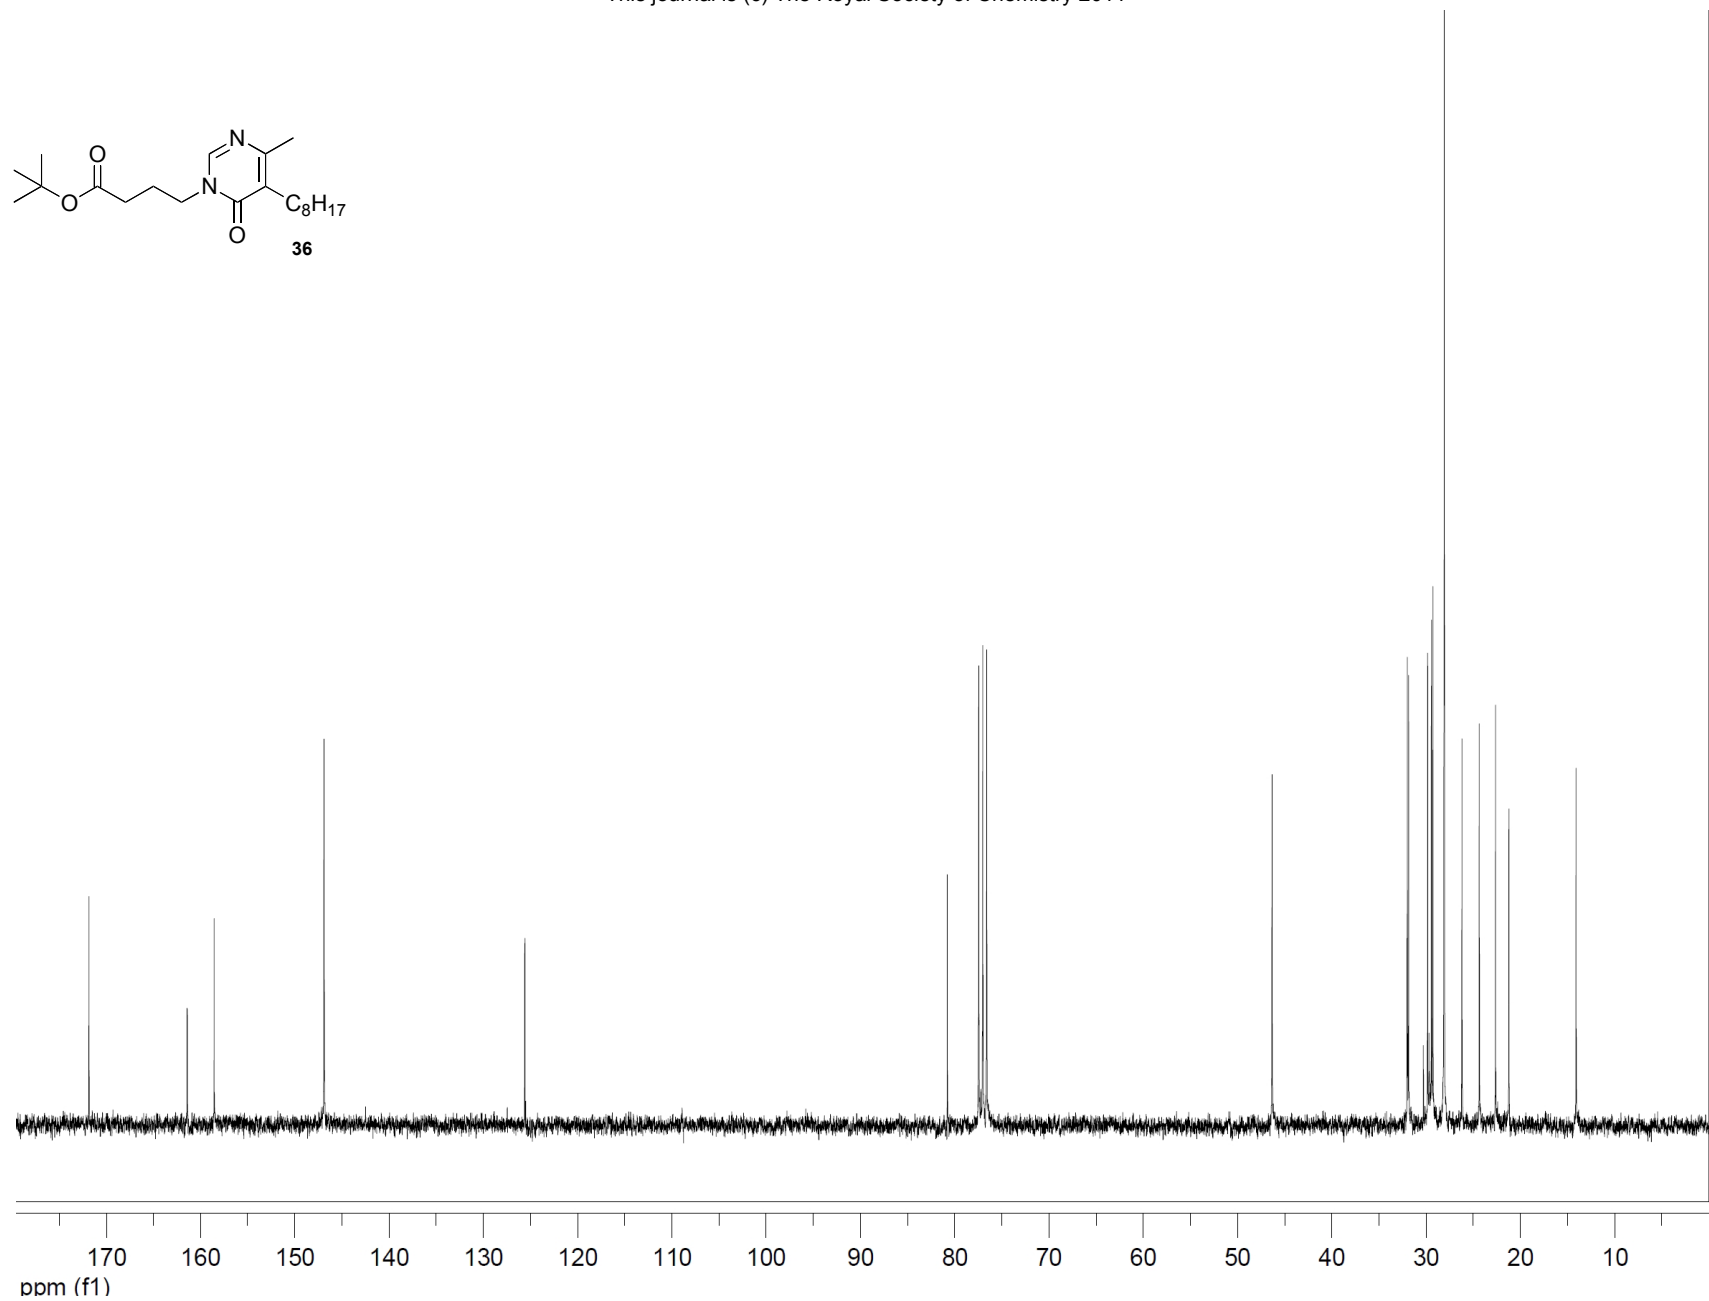

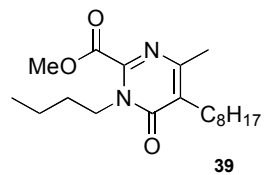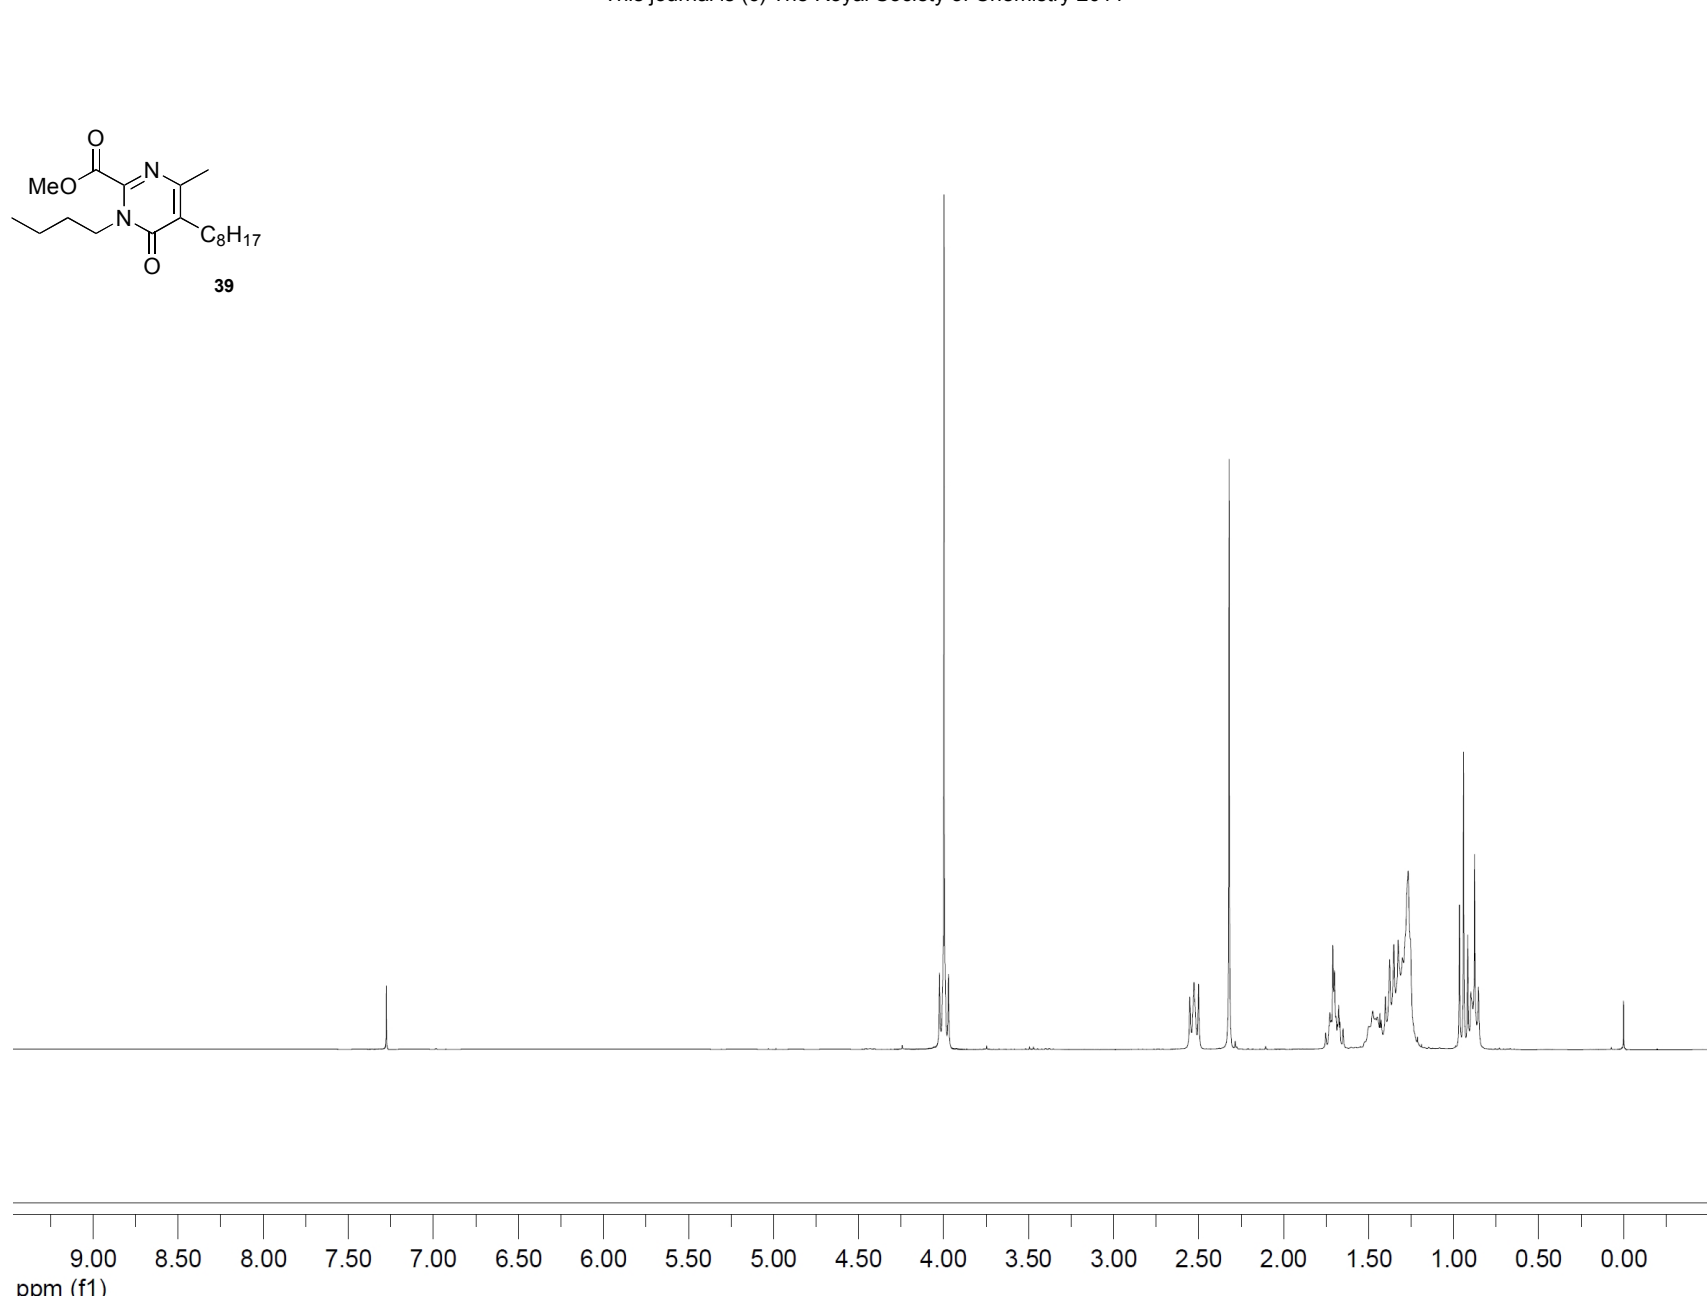

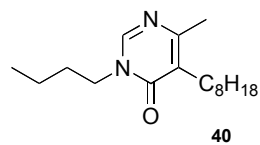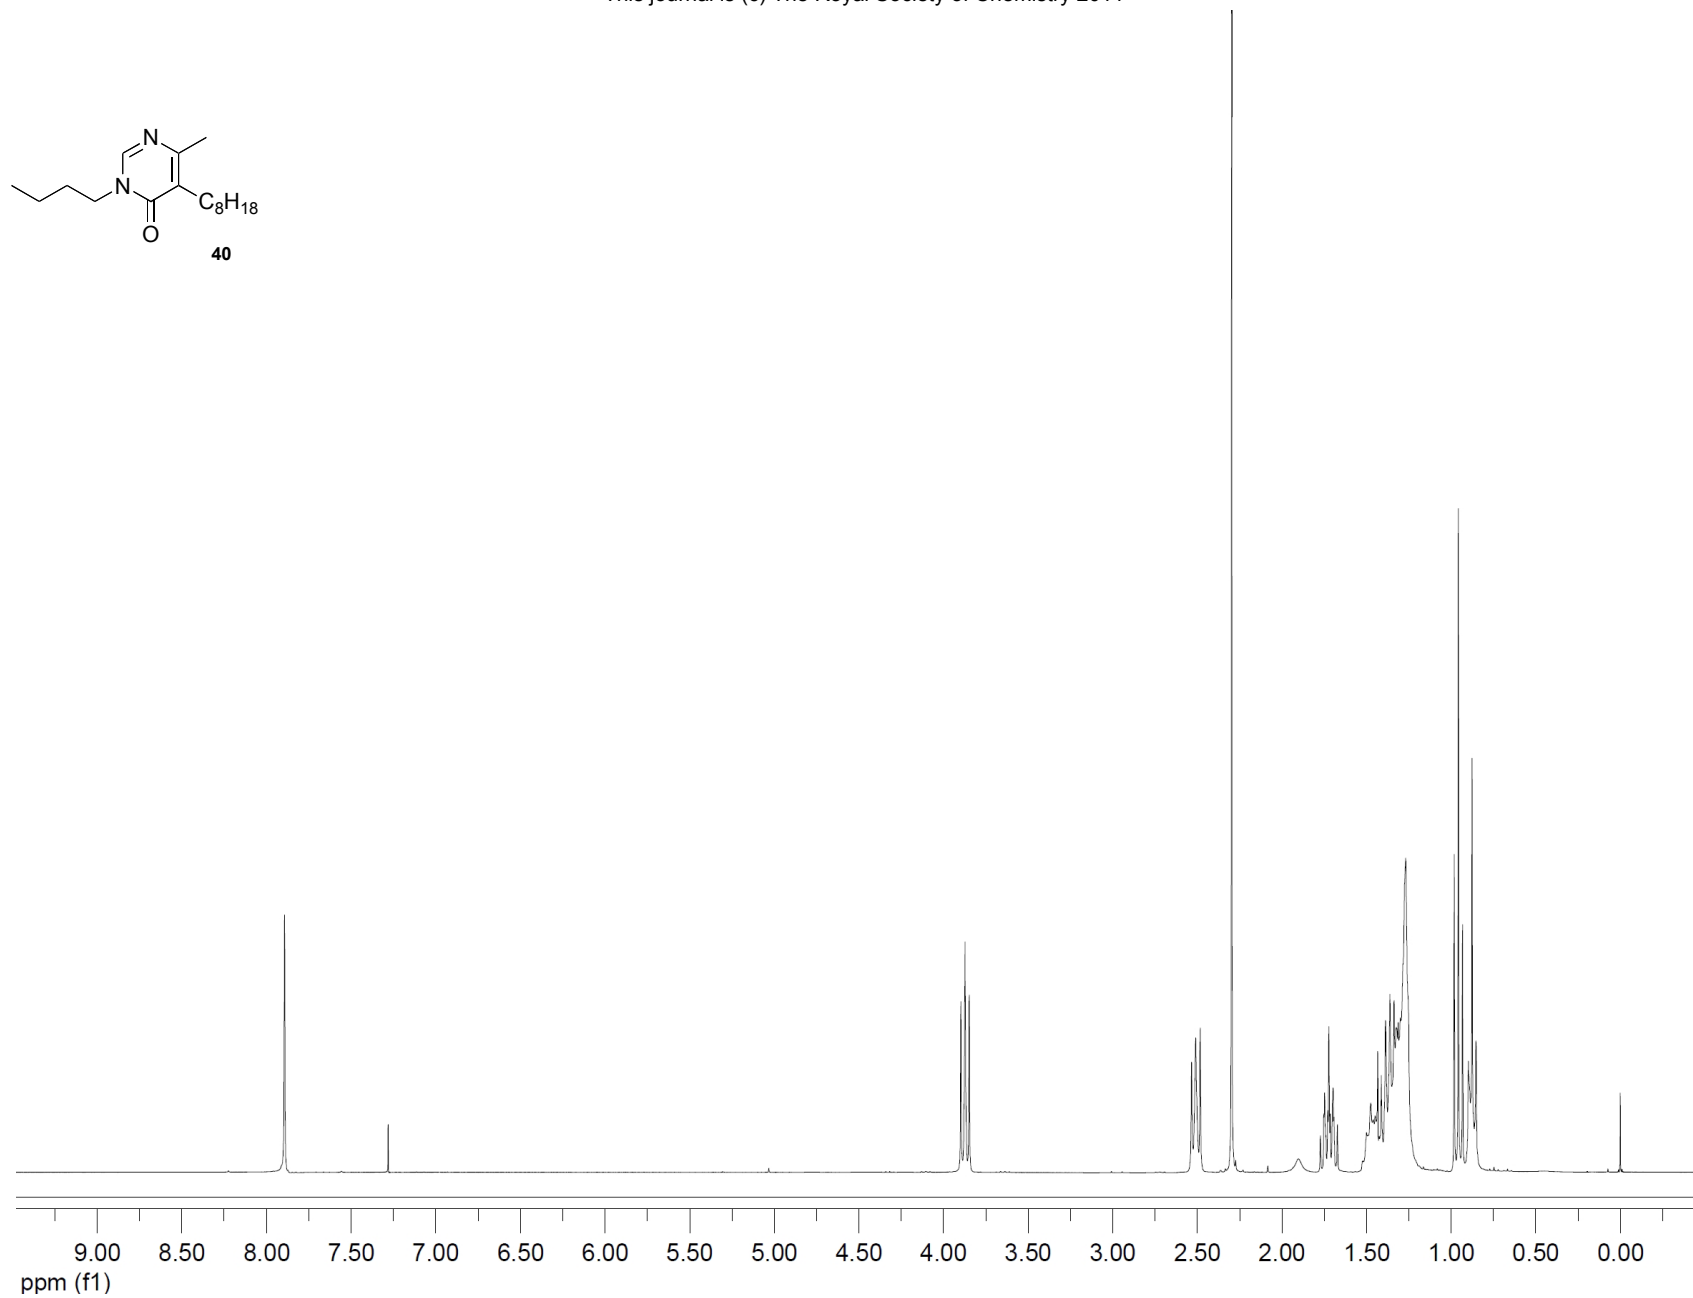



40

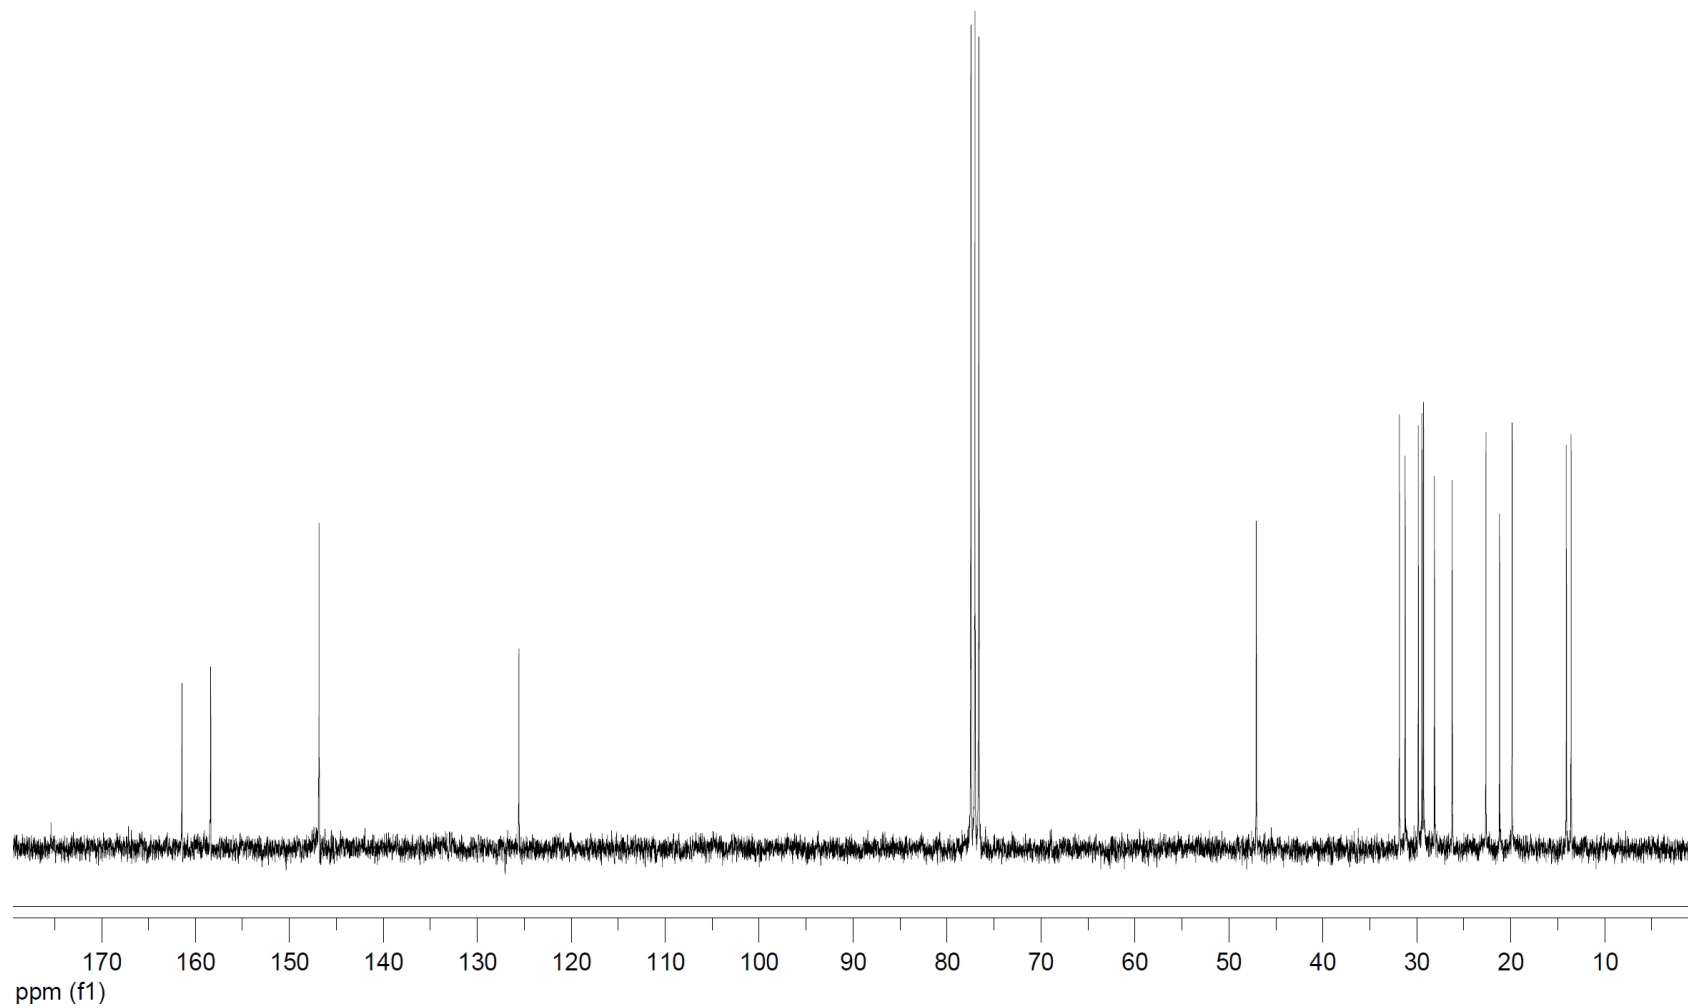

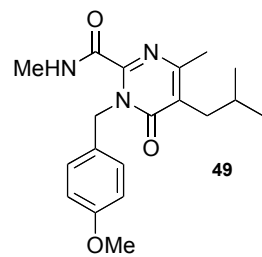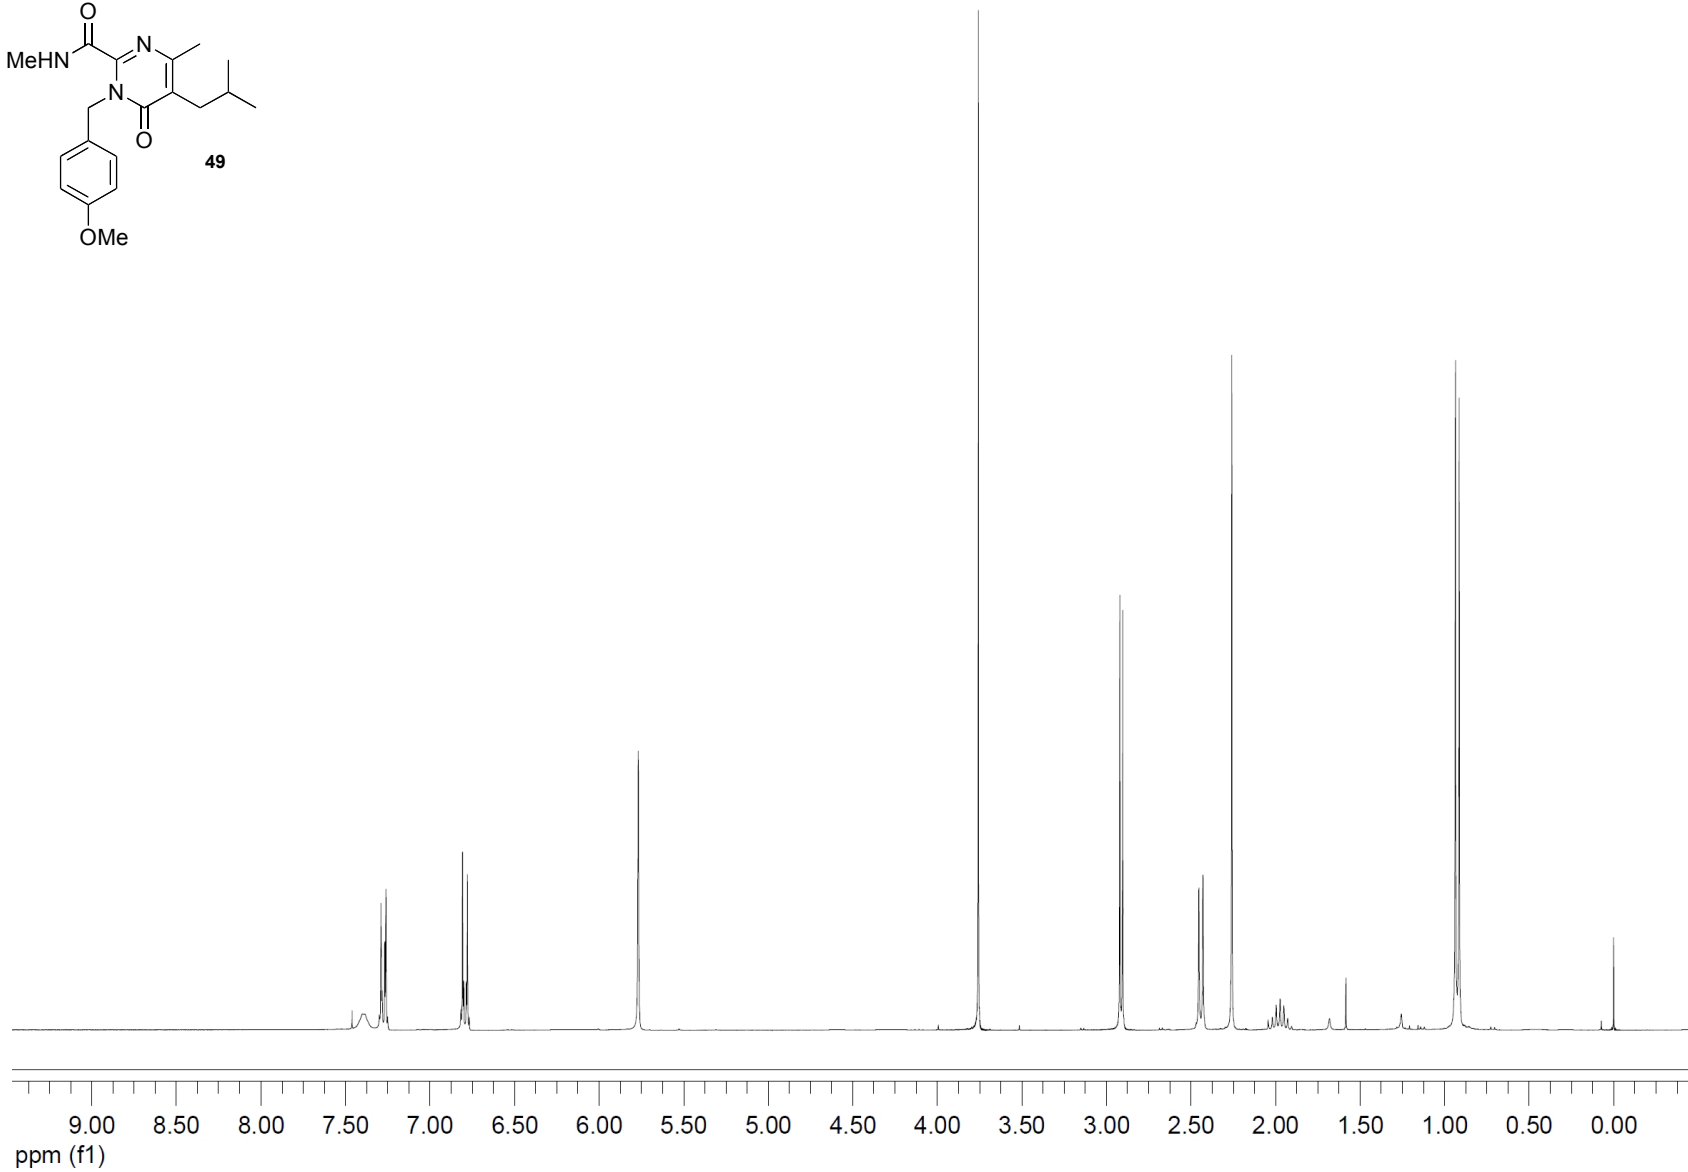

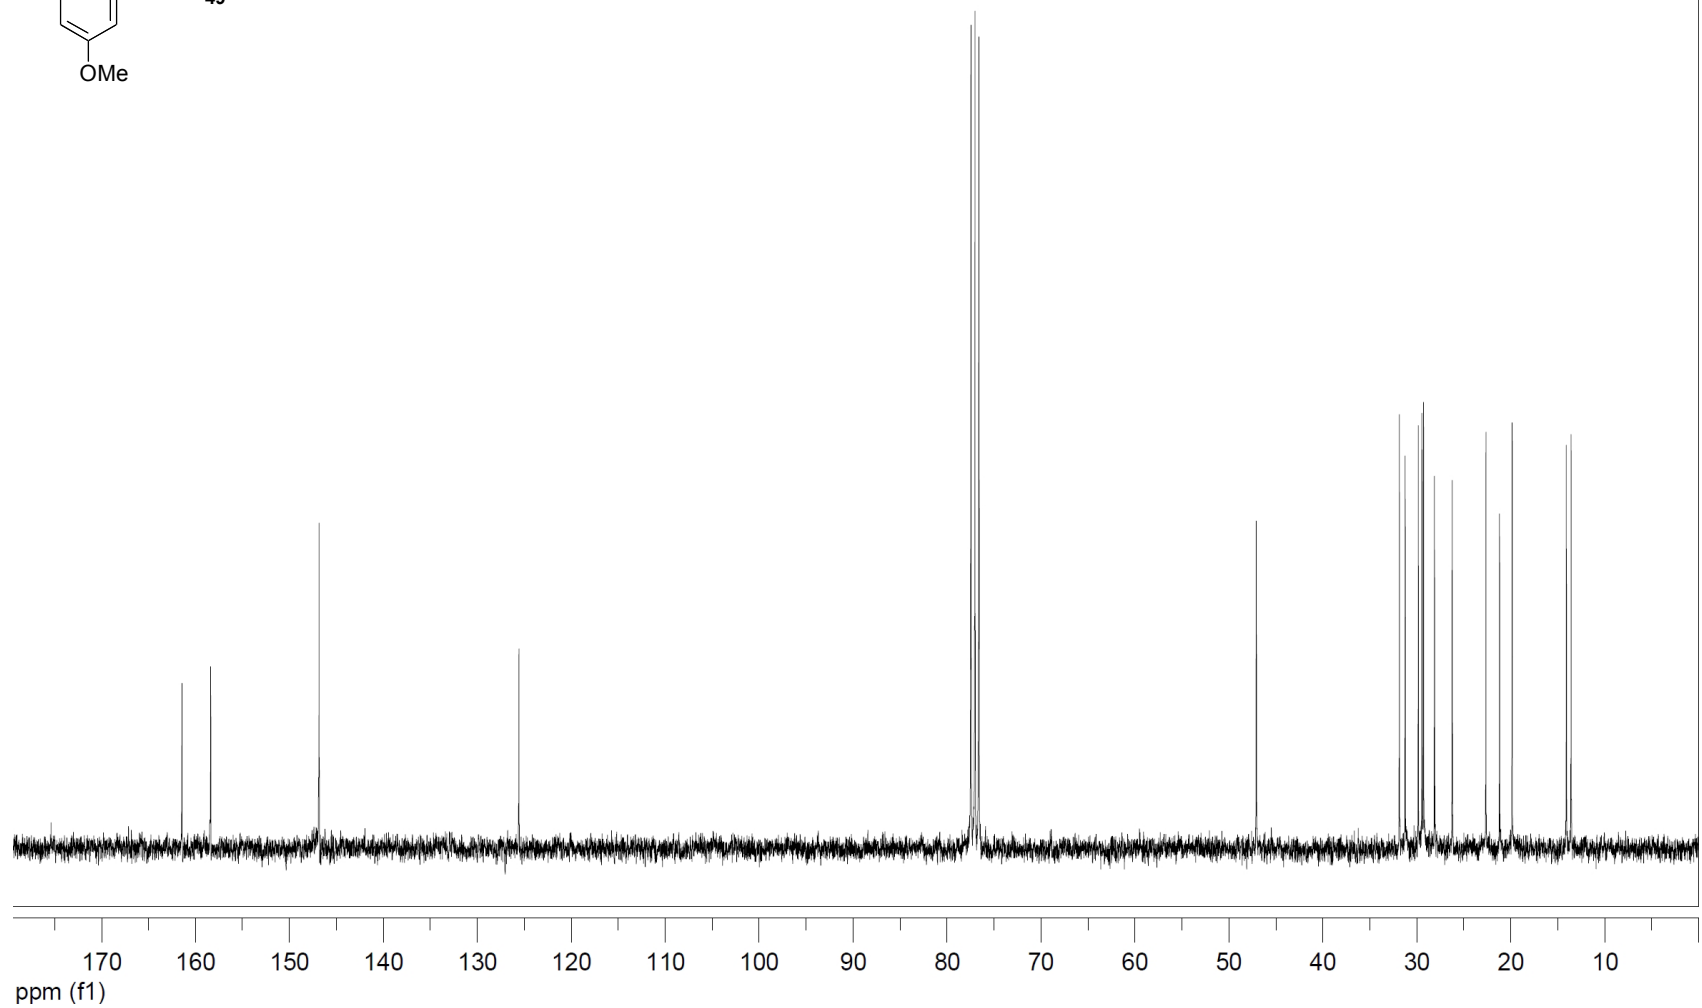



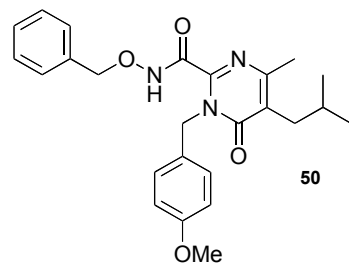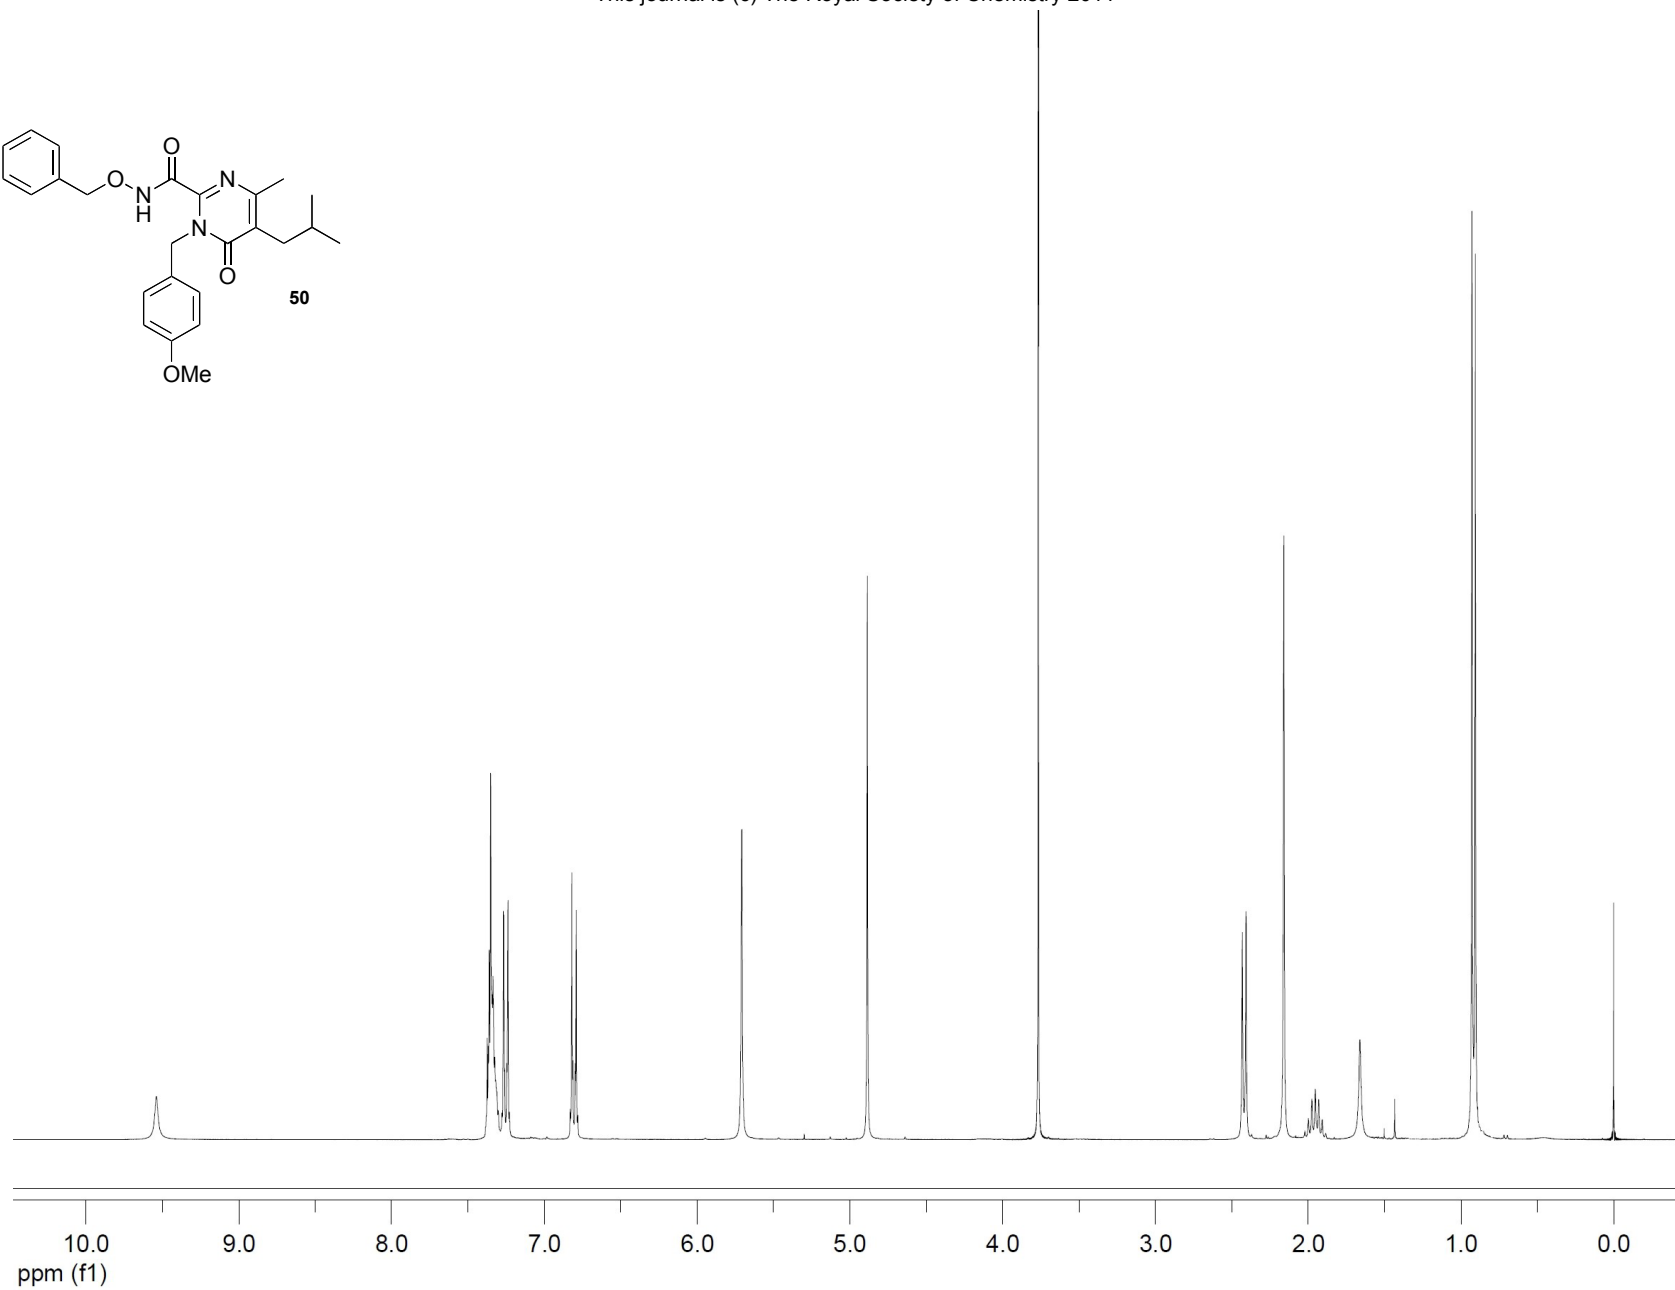

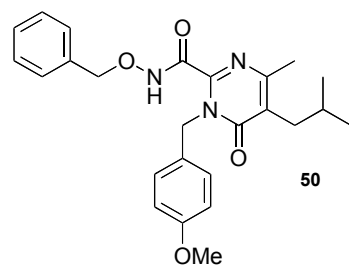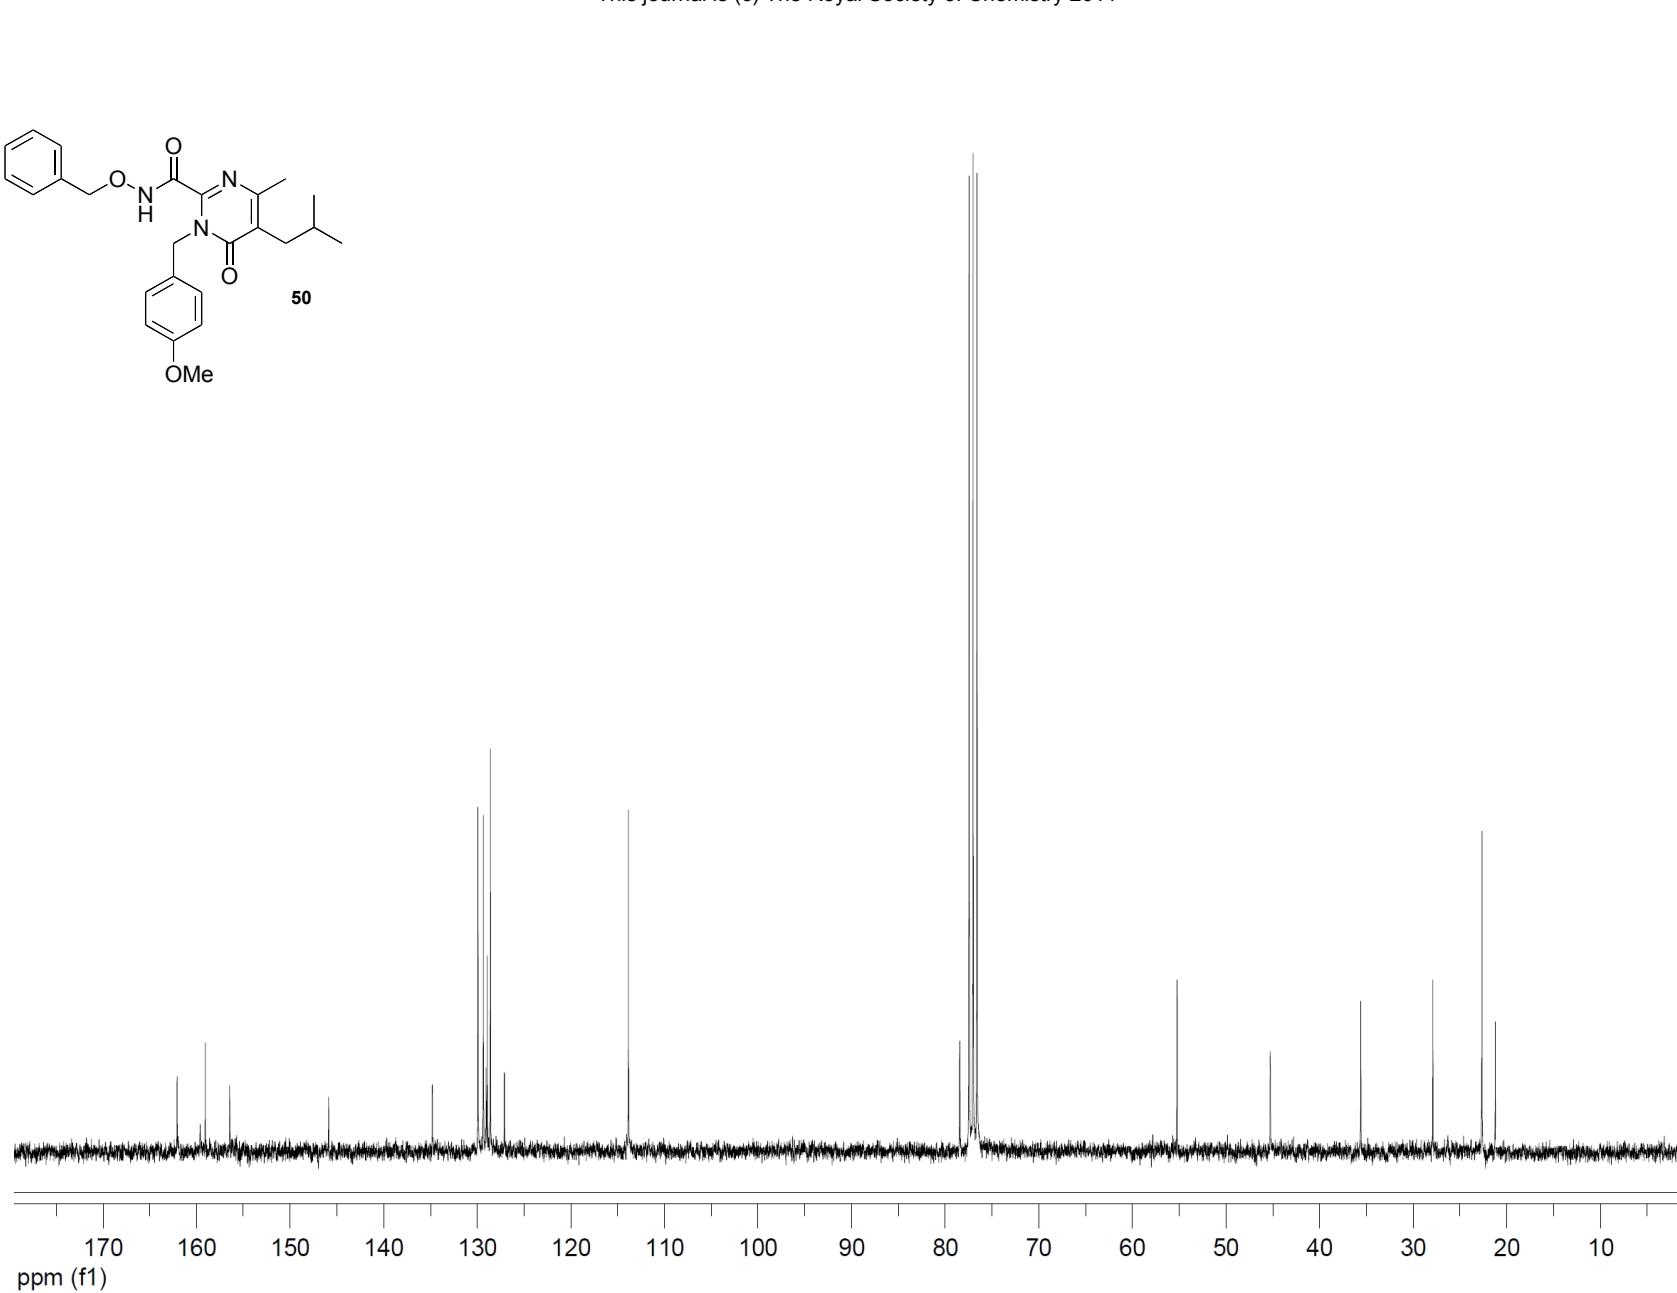

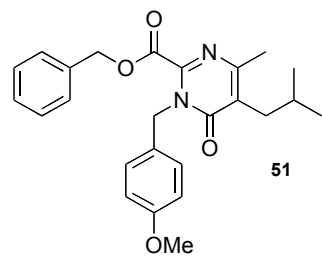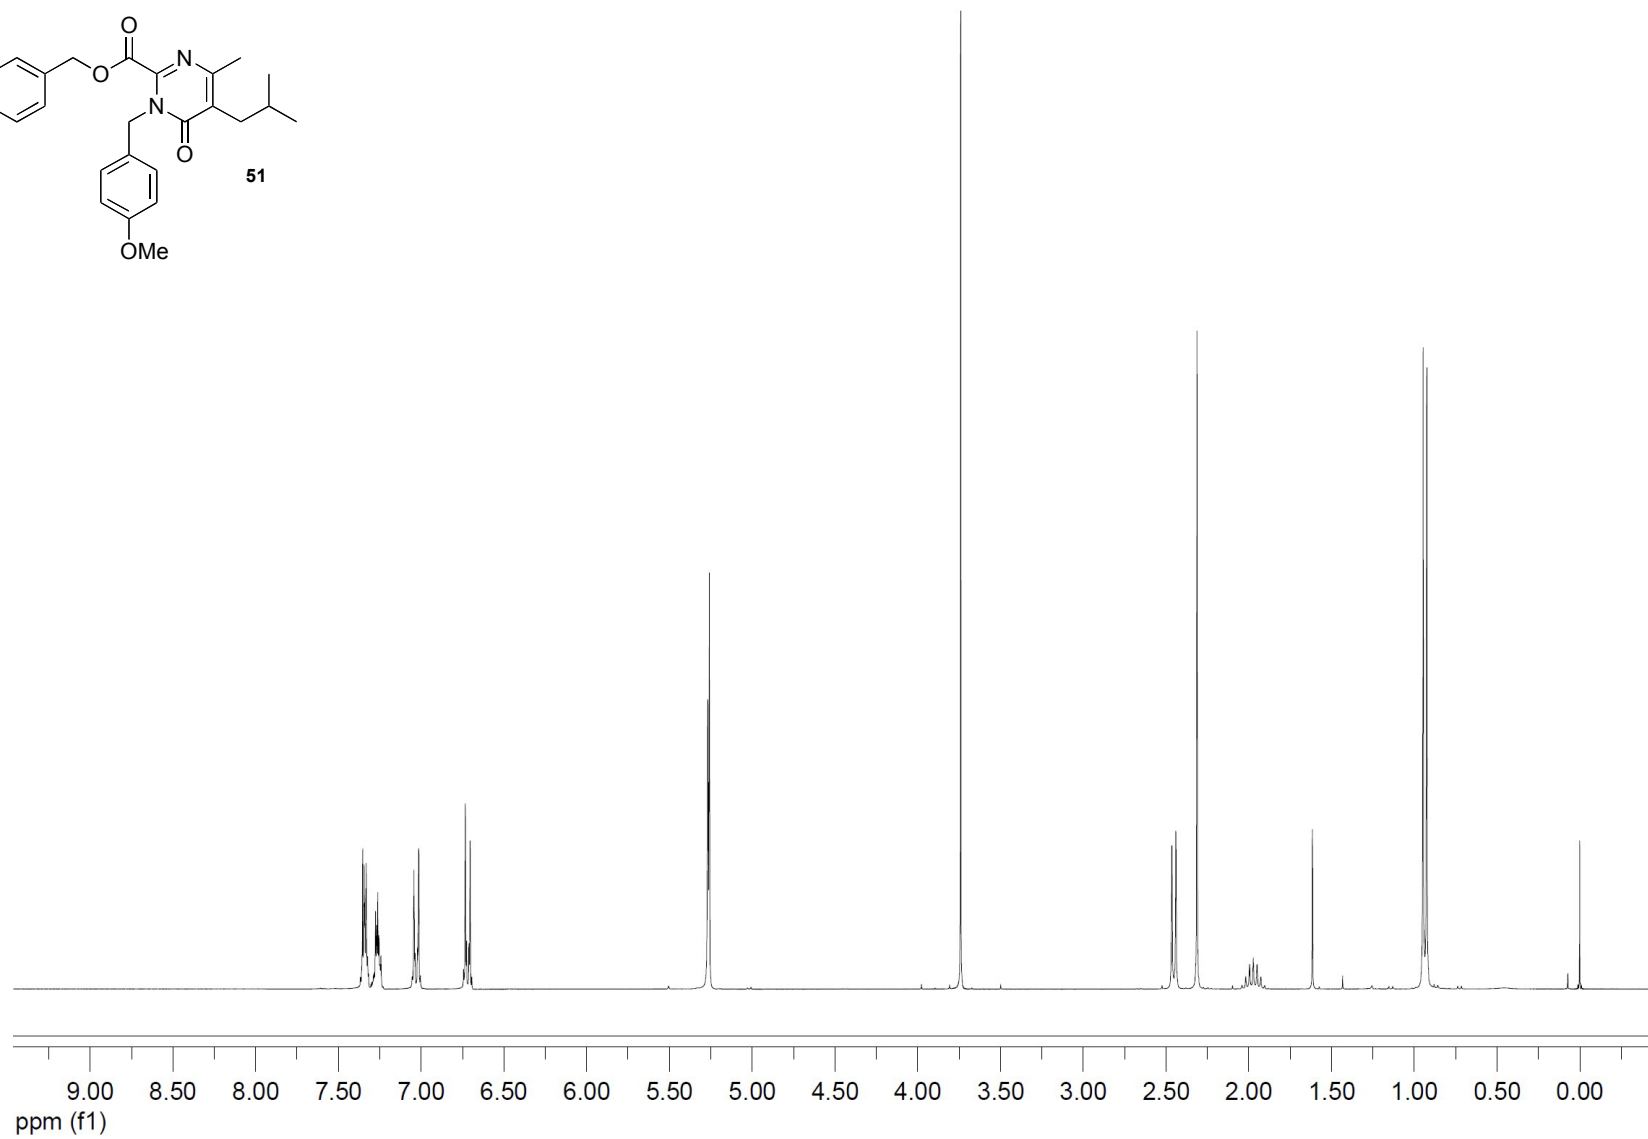

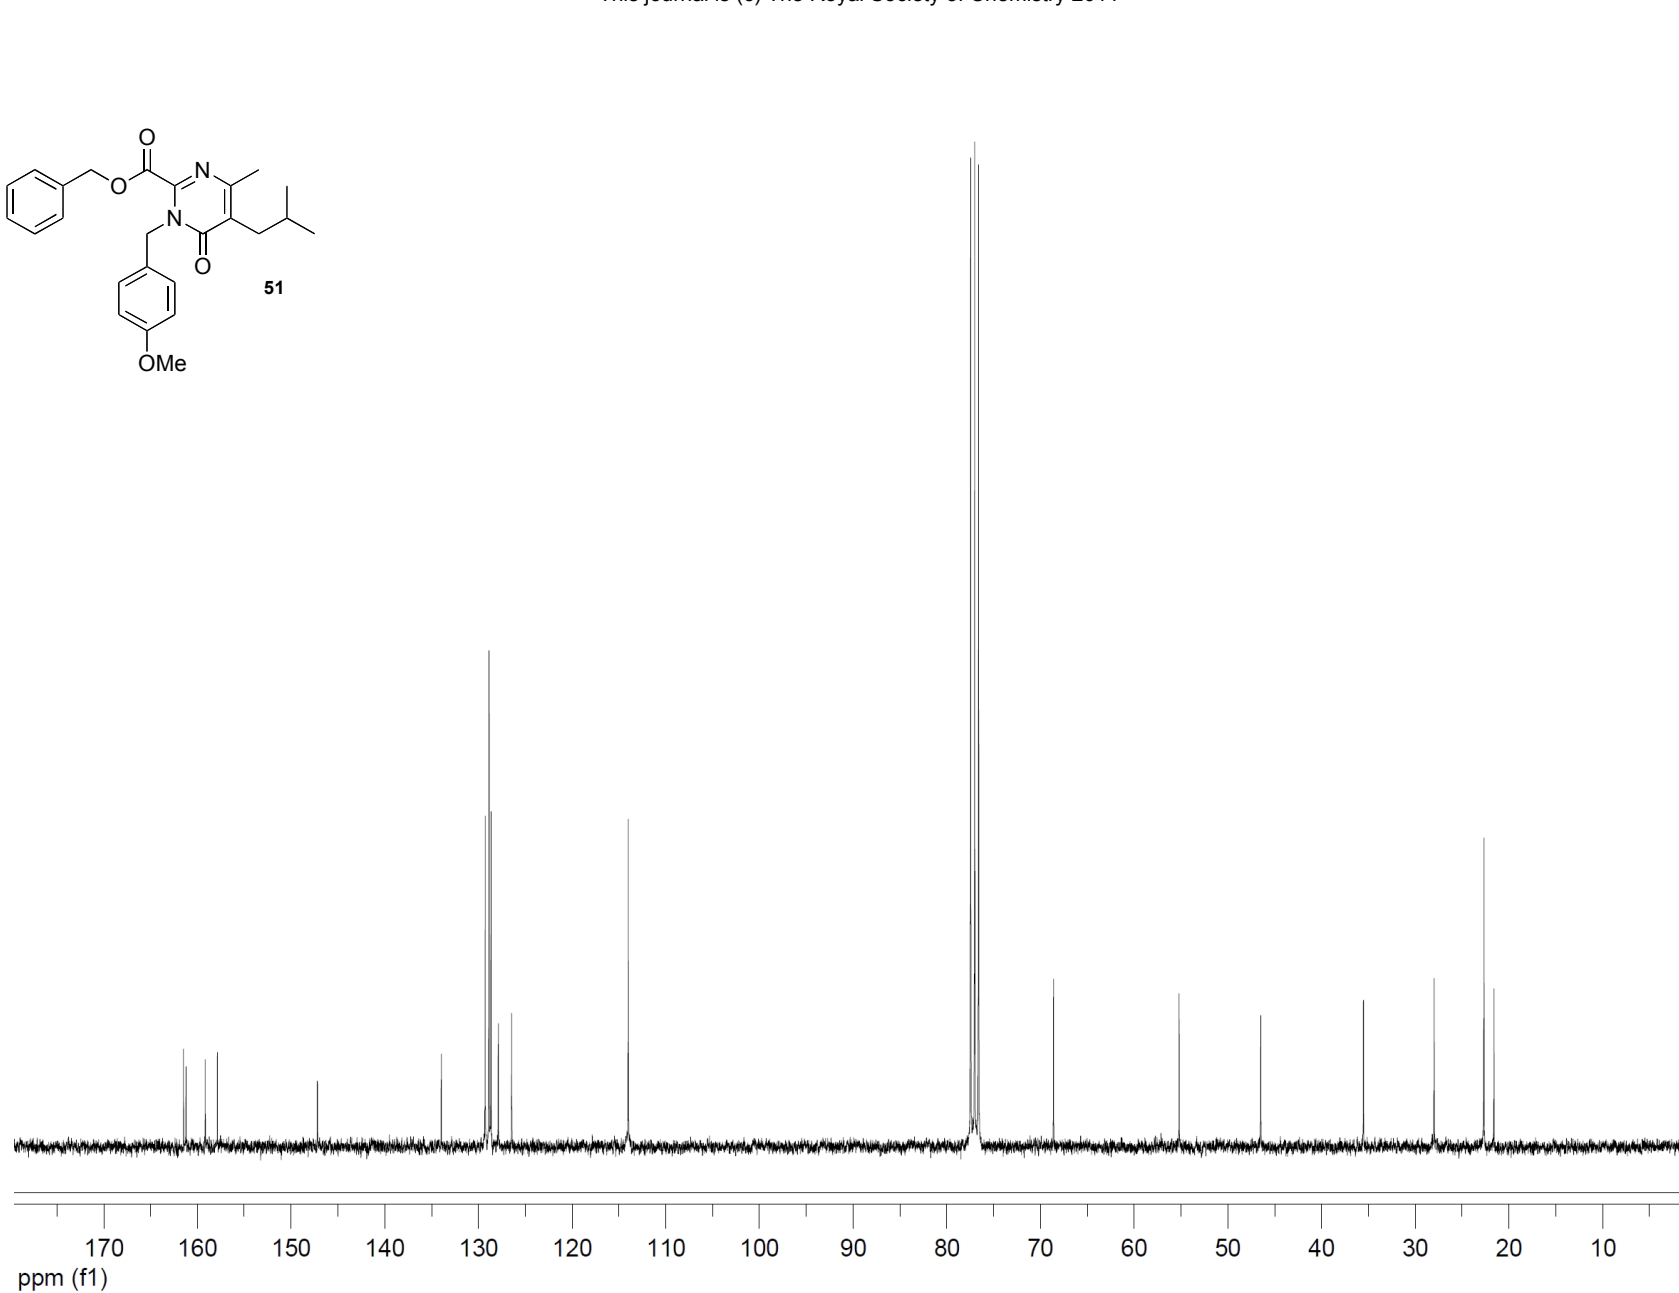

Supplement: c0ob00978d.pdf [file c0ob00978d.pdf]
